# Supplementary material
Source: PubMed Central journal article supplement (PMC3795527)
Supplement: NIHMS517272-supplement-1_si_001.pdf [file NIHMS517272-supplement-1_si_001.pdf]

# Gold(I)-Catalyzed Enantioselective Carboalkoxylation of Alkynes

Weiwei Zi and F. Dean Toste\*

Department of Chemistry, University of California, Berkeley, California 94720, United States

## Table of Contents

|                                                                              |     |
|------------------------------------------------------------------------------|-----|
| 1. General Information-----                                                  | S2  |
| 2. Preparation of Substrates-----                                            | S2  |
| 3. Optimization of Reaction Conditions-----                                  | S4  |
| 4. General Procedure for Gold(I) Catalyzed Carboalkoxylation of Alkynes----- | S5  |
| 5. Spectral Data of Substrates-----                                          | S5  |
| 6. Spectral Data of Products-----                                            | S8  |
| 7. Copies of Spectral Data-----                                              | S14 |
| 8. Copies of Chiral HPLC Analysis-----                                       | S51 |
| 9. Single Crystal X-ray Analysis of 3k-----                                  | S68 |

## Supporting Information

**1. General Information.** Unless otherwise noted, reagents were obtained from commercial sources and used without further purification. All reactions were carried out under air unless otherwise stated. Dry THF, dichloromethane, diethyl ether, toluene, triethylamine, and dimethylformamide were obtained by passage through activated alumina columns under argon. All other dried solvents were obtained by storage over 3Å or 4Å molecular sieves overnight. TLC analysis of reaction mixtures was performed on Merck silica gel 60 F254 TLC plates and visualized by UV, I<sub>2</sub>/silica, and/or ceric ammonium molybdate stain. Flash chromatography was carried out with ICN Sili Tech 32-63 D 60 Å silica gel. <sup>1</sup>H and <sup>13</sup>C NMR spectra were recorded with Bruker AV-300, AVQ-400, AVB-400 spectrometers and were referenced to residual <sup>1</sup>H and <sup>13</sup>C signals of the deuterated solvents respectively ( $\delta$  H 7.26,  $\delta$  C 77.00 for chloroform). Mass spectral data were obtained via the Micro-Mass/Analytical Facility operated by the College of Chemistry, University of California, Berkeley. X-Ray crystallographic analysis was carried out by X-Ray Crystallographic Facility (CHEXRAY, University of California, Berkeley).

### 2. Preparation of Substrates.

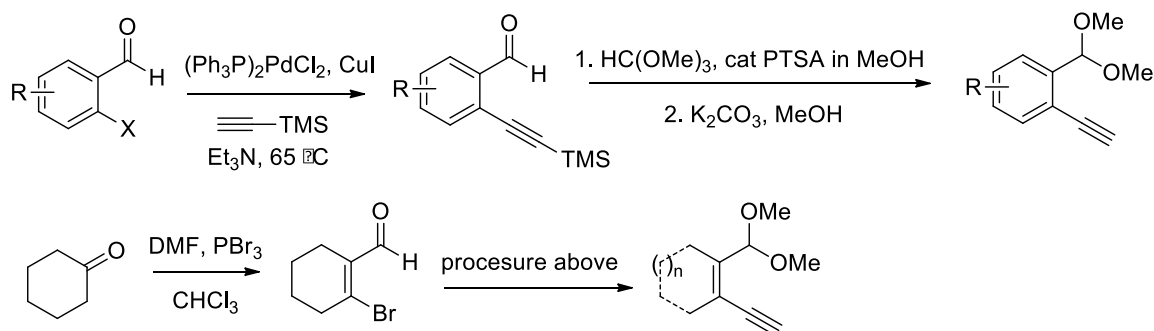

#### 2.1 General Procedure for Preparation of Phenyl Acetylenes.<sup>1</sup>

A mixture of 2-bromobenzaldehyde (1.0 equiv), (Ph<sub>3</sub>P)<sub>2</sub>PdCl<sub>2</sub> (0.02 equiv) and CuI (0.01 equiv) in a flask was degassed, then Et<sub>3</sub>N (0.2 M for substrate) was added under argon atmosphere. To this solution ethynyl trimethylsilane (5 equiv) was added by syringe. The mixture was warmed to 65 °C for 12 hours and TLC showed the starting aldehyde was completely consumed. After cooling to room temperature, the reaction mixture was filtrated through celite. The filtrate was concentrated and purified by chromatography.

The product from the first step was dissolved in MeOH (0.2 M for substrate) and HC(OMe)<sub>3</sub> (5 equiv) was added, followed by PTSA·H<sub>2</sub>O (0.1 equiv). The solution was stirred at room temperature for 4 hours and TLC showed the starting aldehyde was completely consumed. The solvent was removed under reduced pressure and the residue was made basic by addition of

<sup>1</sup> Park, J. H.; Bhilare, S. V.; Youn, S. W. *Org. Lett.* **2011**, 13, 2228

saturated NaHCO<sub>3</sub> solution, extracted with EtOAc (3 times) and the organic layer concentrated. The crude acetal was dissolved in MeOH (0.2 M for substrate) and K<sub>2</sub>CO<sub>3</sub> (0.1 equiv) was added. Desilylation was conducted at room temperature for 2 hours and concentrated. The final product was purified by chromatography.

## 2.2 General Procedure for Preparation of Vinyl Acetylenes.<sup>2</sup>

To a solution of PBr<sub>3</sub> (2.5 equiv) in CHCl<sub>3</sub> (0.25 M for substrate), DMF (3 equiv) was added slowly at 0 °C. The mixture was stirred for 1 hour at room temperature and ketone (1 equiv) was added slowly. After addition was complete, the solution was stirred overnight and then poured into pre-cooled saturated NaHCO<sub>3</sub> solution very carefully. The mixture was extracted with CH<sub>2</sub>Cl<sub>2</sub> and the combined organic layers were dried over Na<sub>2</sub>SO<sub>4</sub>, concentrated under reduced pressure and the crude aldehyde purified by chromatography.

The next three steps (Sonogashira coupling, protection of aldehyde and desilylation) were conducted using the procedure described above.

## 2.3 Preparation of Mixed Acetal.<sup>3</sup>

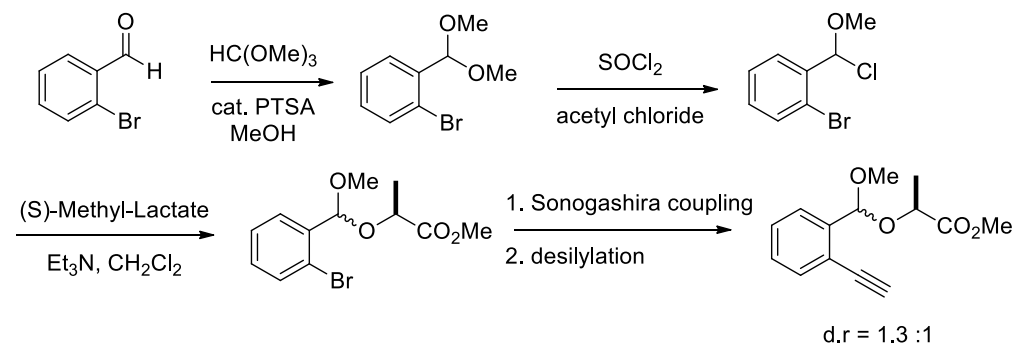

The mixed acetal for mechanistic study was prepared as follows. To a solution of 2-bromobenzaldehyde (4.6 g, 25 mmol) in MeOH (50 mL) was added HC(OMe)<sub>3</sub> (6.8 mL, 62.5 mmol), followed by PTSA·H<sub>2</sub>O (475 mg, 2.5 mmol). The solution was stirred at room temperature for 4 hours and TLC showed the starting aldehyde was completely consumed. The solvent was removed under reduced pressure and the residue was made basic by addition of saturated NaHCO<sub>3</sub> solution, extracted with EtOAc (3 times) and then the organic layers. Were concentrated. The residue was dissolved in acetyl chloride (15 mL) and SOCl<sub>2</sub> (0.2 mL) was added. The mixture was stirred overnight, the solvent was removed under reduced pressure to give the benzyl chloride which was used directly for the next step without further purification.

To a solution of freshly prepared benzyl chloride (2.4 g, 10 mmol) in CH<sub>2</sub>Cl<sub>2</sub> (50 mL) was added (S)-methyl lactate (1.0 g, 10 mmol) followed by Et<sub>3</sub>N (4.1 mL, 30 mmol). The mixture was stirred at room temperature overnight then filtrated through celite. The filtrate was concentrated under reduced pressure and purified by chromatography to give mixed acetal as a colorless oil

<sup>2</sup> Lin, M.-Y.; Das, A.; Liu, R.-S. *J. Am. Chem. Soc.* **2006**, 128, 9340.

<sup>3</sup> Midtkandal, R. R.; Macdonald, S. J. F.; Migaud, M. E. *Chem. Commun.* **2010**, 46, 4538.

(1.5 g, 49% yield). The next two steps (Sonogashira coupling, desilylation) were conducted using the procedure described above.

### 3. Optimization of Reaction Conditions

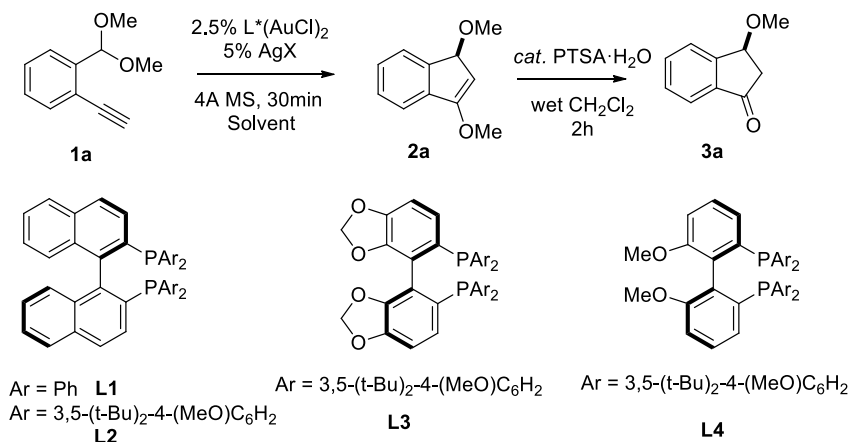

| entry <sup>a</sup>    | L         | AgX                      | solvent                         | yield (%) <sup>b</sup> | ee (%) <sup>c</sup> |
|-----------------------|-----------|--------------------------|---------------------------------|------------------------|---------------------|
| 1                     | L1        | AgSbF <sub>6</sub>       | CH <sub>2</sub> Cl <sub>2</sub> | 75                     | 8                   |
| 2                     | L2        | AgSbF <sub>6</sub>       | CH <sub>2</sub> Cl <sub>2</sub> | 77                     | 2                   |
| 3                     | L3        | AgSbF <sub>6</sub>       | CH <sub>2</sub> Cl <sub>2</sub> | 71                     | 5                   |
| 4                     | L4        | AgSbF <sub>6</sub>       | CH <sub>2</sub> Cl <sub>2</sub> | 74                     | 24                  |
| 5                     | L4        | AgSbF <sub>6</sub>       | CCl <sub>4</sub>                | 74                     | 94                  |
| 6                     | L4        | AgSbF <sub>6</sub>       | benzene                         | 80                     | 89                  |
| 7                     | L4        | AgSbF <sub>6</sub>       | toluene                         | 88                     | 94                  |
| 8                     | L4        | AgSbF <sub>6</sub>       | o-xylene                        | 88                     | 92                  |
| 9                     | L4        | AgSbF <sub>6</sub>       | m-xylene                        | 81                     | 94                  |
| 10                    | L4        | AgBF <sub>4</sub>        | toluene                         | n.r.                   | n.d.                |
| 11                    | L4        | NaBARF                   | toluene                         | 63                     | -35                 |
| <b>12<sup>d</sup></b> | <b>L4</b> | <b>AgSbF<sub>6</sub></b> | <b>toluene</b>                  | <b>92</b>              | <b>95</b>           |

<sup>a</sup> Reaction conditions: 1) 2.5 mol % gold catalyst, 5 mol % AgSbF<sub>6</sub>, 0.05 mmol 1a, 10 mg 4Å molecular sieve, 1 mL solvent. 2) 2.5 mol % PTSA · H<sub>2</sub>O, 1 mL CH<sub>2</sub>Cl<sub>2</sub>, 0.1 mL H<sub>2</sub>O. <sup>b</sup> Isolated yields. <sup>c</sup> Determined by chiral HPLC. <sup>d</sup> 2.5 mmol % AgSbF<sub>6</sub> was used.

#### 4. General Procedure for Gold(I) Catalyzed Carboalkoxylation of Alkynes

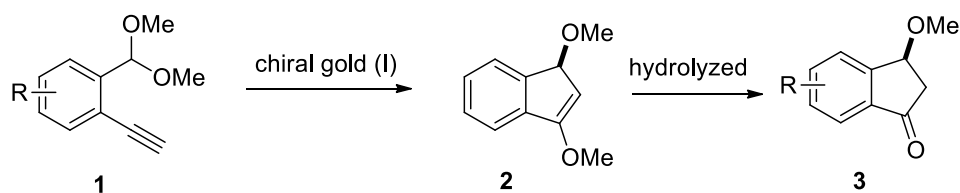

Step 1: (R)-DTBM-MeO-Biphep(AuCl)<sub>2</sub> (8.0 mg, 0.025 equiv) was dissolved in toluene (2 mL). AgSbF<sub>6</sub> (1.7 mg, 0.025 equiv) was added and the solution was stirred at room temperature for 10 min before adding 4 Å molecular sieve (50 mg). Substrate **1** (0.2 mmol) was added to the above solution and mixture was stirred at room temperature. The reaction was monitored by TLC, and once the reaction was done the solution was transferred to a short pad of silica gel, eluted with EtOAc and concentrated under reduced pressure to give crude **2**.

Step 2: The crude **2** was dissolved in CH<sub>2</sub>Cl<sub>2</sub> (2 mL) and H<sub>2</sub>O (0.2 mL) was added followed by PTSA·H<sub>2</sub>O (1 mg, 0.025 equiv). The mixture was stirred at room temperature for 2-8 hours (monitored by TLC) and then saturated NaHCO<sub>3</sub> solution was added and extracted with EtOAc. The combined organic layers were concentrated under reduced pressure. The desired 3-methoxyindanone **3** was purified by chromatography.

A racemic sample was obtained by using Ph<sub>3</sub>PAuCl or racemic Binap(AuCl)<sub>2</sub> instead of (R)-DTBM-MeO-Biphep(AuCl)<sub>2</sub> under the same procedure as above.

#### 5. Spectral Data of Substrates

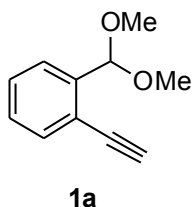

<sup>1</sup>H NMR (400 MHz, CDCl<sub>3</sub>) δ 7.61 (d, *J* = 7.6 Hz, 1H), 7.52 (dd, *J* = 7.6, 1.2 Hz, 1H), 7.39 (td, *J* = 7.6, 1.2 Hz, 1H), 7.30 (td, *J* = 7.6, 1.2 Hz, 1H), 5.37 (s, 1H), 3.39 (s, 6H), 3.34 (s, 1H); <sup>13</sup>C NMR (100 MHz, CDCl<sub>3</sub>) δ 140.10, 132.99, 128.71, 128.34, 126.19, 120.91, 101.92, 81.76, 81.10, 53.81

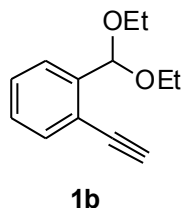

<sup>1</sup>H NMR (400 MHz, CDCl<sub>3</sub>) δ 7.65 (d, *J* = 8.0 Hz, 1H), 7.50 (dd, *J* = 7.6, 1.2 Hz, 1H), 7.38 (td, *J* = 7.6, 1.2 Hz, 1H), 7.28 (td, *J* = 7.6, 1.6 Hz, 1H), 5.83 (s, 1H), 3.73-3.66 (m, 2H), 3.63-3.54 (m, 2H), 3.32 (s, 1H), 1.25 (t, *J* = 7.2 Hz, 6H); <sup>13</sup>C NMR (100 MHz, CDCl<sub>3</sub>) δ 141.25, 132.87, 128.88, 128.15, 126.13, 120.82, 100.24, 81.62, 81.23, 62.39, 15.17; HRMS (ESI) calcd. for C<sub>13</sub>H<sub>16</sub>O<sub>2</sub>Na (M + Na)<sup>+</sup>: 227.1043, Found: 227.1044.

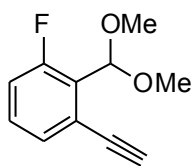

**1c**

$^1\text{H}$  NMR (400 MHz,  $\text{CDCl}_3$ )  $\delta$  7.32-7.27 (m, 1H), 7.15-7.10 (m, 1H), 5.80 (s, 1H), 3.53 (s, 6H), 3.39 (s, 1H);  $^{13}\text{C}$  NMR (100 MHz,  $\text{CDCl}_3$ )  $\delta$  160.76 (d,  $J = 249.9$  Hz), 129.93 (d,  $J = 9.7$  Hz), 129.29 (d,  $J = 3.6$  Hz), 127.35 (d,  $J = 13.3$  Hz), 123.01 (d,  $J = 7.2$  Hz), 117.50 ( $J = 23.3$  Hz), 103.22, 82.42, 80.50 (d,  $J = 3.3$  Hz), 55.45; HRMS (ESI) calcd. for  $\text{C}_{11}\text{H}_{11}\text{O}_2\text{FNa}$  ( $\text{M} + \text{Na}$ ) $^+$ : 217.0635, Found: 217.0637.

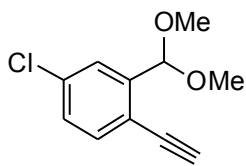

**1d**

$^1\text{H}$  NMR (400 MHz,  $\text{CDCl}_3$ )  $\delta$  7.61 (d,  $J = 2.4$  Hz, 1H), 7.45 (d,  $J = 8.4$  Hz, 1H), 7.28 (dd,  $J = 8.4, 2.0$  Hz, 1H), 5.67 (s, 1H), 3.39 (s, 6H), 3.37 (s, 1H);  $^{13}\text{C}$  NMR (100 MHz,  $\text{CDCl}_3$ )  $\delta$  141.95, 135.01, 134.15, 128.61, 126.79, 119.33, 101.17, 82.66, 80.14, 53.77; HRMS (EI) calcd. for  $\text{C}_{11}\text{H}_{11}\text{O}_2\text{Cl}$  ( $\text{M}$ ) $^+$ : 210.0448, Found: 210.0450.

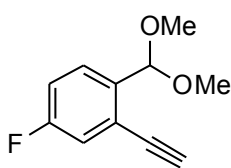

**1e**

$^1\text{H}$  NMR (400 MHz,  $\text{CDCl}_3$ )  $\delta$  7.62 (dd,  $J = 8.8, 6.0$  Hz, 1H), 7.24 (dd,  $J = 8.8, 2.8$  Hz, 1H), 7.12 (td,  $J = 8.4, 2.8$  Hz, 1H), 5.71 (s, 1H), 3.42 (s, 6H), 3.41 (s, 1H);  $^{13}\text{C}$  NMR (100 MHz,  $\text{CDCl}_3$ )  $\delta$  162.05 (d,  $J = 246.9$  Hz), 136.42 (d,  $J = 29$  Hz), 128.35 (d,  $J = 87.0$  Hz), 119.53 (d,  $J = 224$  Hz), 116.13 (d,  $J = 210$  Hz), 82.76, 79.98 (d,  $J = 28$  Hz), 53.82; HRMS (EI) calcd. for  $\text{C}_{11}\text{H}_{11}\text{OF}$  ( $\text{M}$ ) $^+$ : 197.0743, Found: 197.0742.

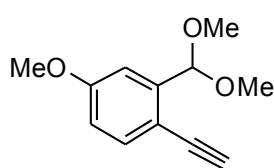

**1f**

$^1\text{H}$  NMR (400 MHz,  $\text{CDCl}_3$ )  $\delta$  7.44 (d,  $J = 8.4$  Hz, 1H), 7.13 (d,  $J = 2.8$  Hz, 1H), 6.83 (dd,  $J = 8.8, 2.8$  Hz, 1H), 5.67 (s, 1H), 5.68 (s, 1H), 3.84 (s, 3H), 3.41 (s, 6H), 3.25 (s, 1H);  $^{13}\text{C}$  NMR (100 MHz,  $\text{CDCl}_3$ )  $\delta$  159.95, 141.99, 134.34, 114.72, 112.99, 111.11, 101.95, 81.19, 80.26, 55.38, 54.03; HRMS (EI) calcd. for  $\text{C}_{12}\text{H}_{14}\text{O}_3$  ( $\text{M}$ ) $^+$ : 206.0943, Found: 206.0944.

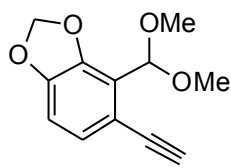

**1g**

$^1\text{H}$  NMR (400 MHz,  $\text{CDCl}_3$ )  $\delta$  7.10 (d,  $J = 8.0$  Hz, 1H), 6.79 (d,  $J = 8.0$  Hz, 1H), 6.09 (s, 2H), 5.75 (s, 1H), 3.52 (s, 6H), 3.24 (s, 1H);  $^{13}\text{C}$  NMR (100 MHz,  $\text{CDCl}_3$ )  $\delta$  149.02, 145.28, 127.77, 121.86, 114.43, 108.66, 103.17, 101.93, 81.2, 79.88, 55.11; HRMS (EI) calcd. for  $\text{C}_{12}\text{H}_{12}\text{O}_4$  ( $\text{M}$ ) $^+$ : 220.0736, Found: 220.0736.

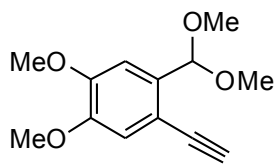

**1h**

$^1\text{H}$  NMR (400 MHz,  $\text{CDCl}_3$ )  $\delta$  7.08 (s, 1H), 6.96 (s, 1H), 5.64 (s, 1H), 3.91 (s, 3H), 3.86 (s, 3H), 3.38 (s, 6H), 3.25 (s, 1H);  $^{13}\text{C}$  NMR (100 MHz,  $\text{CDCl}_3$ )  $\delta$  149.74, 148.56, 134.01, 114.71, 112.88, 108.70, 102.16, 81.19, 80.29, 55.93, 54.10; HRMS (EI) calcd. for  $\text{C}_{13}\text{H}_{16}\text{O}_4$  ( $\text{M}$ ) $^+$ : 236.1049, Found: 236.1053.

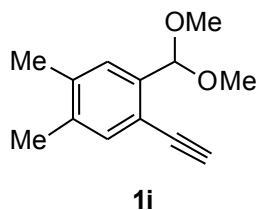

$^1\text{H}$  NMR (400 MHz,  $\text{CDCl}_3$ )  $\delta$  7.36 (s, 1H), 7.30 (s, 1H), 5.67 (s, 1H), 3.39 (s, 6H), 3.26 (s, 1H), 2.28 (s, 3H), 3.24 (s, 3H);  $^{13}\text{C}$  NMR (100 MHz,  $\text{CDCl}_3$ )  $\delta$  137.85, 137.53, 136.93, 133.84, 127.25, 118.05, 102.09, 81.42, 80.63, 53.86, 19.88, 19.26; HRMS (EI) calcd. for  $\text{C}_{13}\text{H}_{16}\text{O}_2$  ( $\text{M}^+$ ): 204.1150, Found: 204.1155.

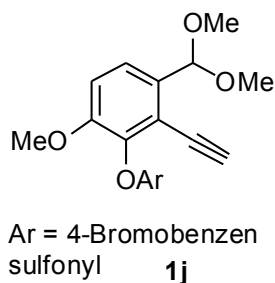

$^1\text{H}$  NMR (400 MHz,  $\text{CDCl}_3$ )  $\delta$  7.85 (d,  $J = 8.8$  Hz, 2H), 7.69 (d,  $J = 9.2$  Hz, 1H), 7.47 (d,  $J = 8.8$  Hz, 1H), 6.95 (d,  $J = 8.4$  Hz, 1H), 5.57 (s, 1H), 3.66 (s, 3H), 3.36 (s, 6H), 3.29 (s, 3H);  $^{13}\text{C}$  NMR (100 MHz,  $\text{CDCl}_3$ )  $\delta$  152.16, 140.20, 136.89, 133.53, 132.03, 129.97, 128.94, 125.69, 117.69, 112.72, 101.38, 87.34, 75.37, 55.86, 53.84; HRMS (ESI) calcd. for  $\text{C}_{18}\text{H}_{17}\text{O}_6\text{BrSK}$  ( $\text{M} + \text{K}$ ) $^+$ : 475.9561, Found: 475.9564.

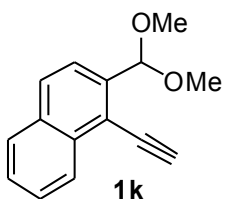

$^1\text{H}$  NMR (400 MHz,  $\text{CDCl}_3$ )  $\delta$  8.43 (d,  $J = 8.4$  Hz, 1H), 7.90-7.85 (m, 2H), 7.74 (d,  $J = 8.8$  Hz, 1H), 7.64-7.54 (m, 2H), 5.98 (s, 1H), 3.79 (s, 1H), 3.46 (s, 6H);  $^{13}\text{C}$  NMR (100 MHz,  $\text{CDCl}_3$ )  $\delta$  139.54, 133.41, 133.06, 129.11, 128.20, 127.18, 126.84, 126.41, 123.32, 118.43, 102.88, 87.45, 79.00, 54.31; HRMS (EI) calcd. for  $\text{C}_{15}\text{H}_{14}\text{O}_2$  ( $\text{M}^+$ ): 226.0994, Found: 226.0993.

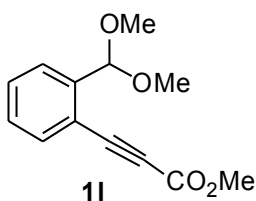

$^1\text{H}$  NMR (400 MHz,  $\text{CDCl}_3$ )  $\delta$  7.68 (d,  $J = 7.6$  Hz, 1H), 7.64 (d,  $J = 7.2$  Hz, 1H), 7.51 (t,  $J = 7.6$  Hz, 1H), 7.64 (d,  $J = 7.2$  Hz, 1H), 7.51 (t,  $J = 7.6$  Hz, 1H), 7.38 (t,  $J = 7.6$  Hz, 1H), 5.68 (s, 1H), 3.88 (s, 3H), 3.45 (s, 6H);  $^{13}\text{C}$  NMR (100 MHz,  $\text{CDCl}_3$ )  $\delta$  154.41, 141.78, 133.82, 130.67, 128.59, 126.44, 118.44, 102.12, 84.61, 83.97, 54.37, 52.84; HRMS (ESI) calcd. for  $\text{C}_{13}\text{H}_{14}\text{O}_4\text{K}$  ( $\text{M} + \text{K}$ ) $^+$ : 273.0524, Found: 273.0524.

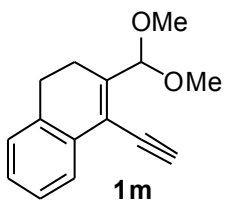

$^1\text{H}$  NMR (400 MHz,  $\text{CDCl}_3$ )  $\delta$  8.43 (d,  $J = 8.4$  Hz, 1H), 7.90-7.85 (m, 2H), 7.74 (d,  $J = 8.8$  Hz, 1H), 7.64-7.54 (m, 2H), 5.98 (s, 1H), 3.79 (s, 1H), 3.46 (s, 6H);  $^{13}\text{C}$  NMR (100 MHz,  $\text{CDCl}_3$ )  $\delta$  144.75, 135.49, 132.22, 128.13, 127.30, 126.63, 125.74, 119.18, 104.67, 83.98, 78.77, 55.05, 27.16, 21.33; HRMS (EI) calcd. for  $\text{C}_{15}\text{H}_{16}\text{O}_2$  ( $\text{M}^+$ ): 228.1150, Found: 228.1154.

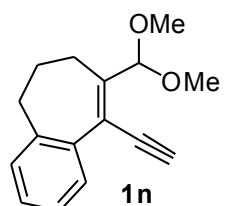

$^1\text{H}$  NMR (400 MHz,  $\text{CDCl}_3$ )  $\delta$  7.53 (d,  $J = 7.6$  Hz, 1H), 7.32-7.19 (m, 3H), 5.50 (s, 1H), 3.49 (s, 6H), 3.24 (s, 1H), 2.62 (t,  $J = 6.8$  Hz, 2H), 2.22-2.17 (m, 2H), 2.05 (t,  $J = 6.8$  Hz, 2H);  $^{13}\text{C}$  NMR (100 MHz,  $\text{CDCl}_3$ )  $\delta$  147.86, 140.47, 138.03, 128.79, 128.15, 127.80, 126.16, 121.77, 105.38, 81.46, 81.33, 55.16, 35.33, 31.98, 23.64; HRMS (EI) calcd. for  $\text{C}_{16}\text{H}_{18}\text{O}_2$  ( $\text{M}^+$ ): 232.1307, Found: 242.1304.

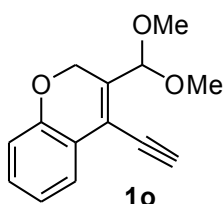

$^1\text{H}$  NMR (400 MHz,  $\text{CDCl}_3$ )  $\delta$  7.51 (dd,  $J = 7.6, 1.2$  Hz, 1H), 7.20 (td,  $J = 8.0, 1.6$  Hz, 1H), 6.97 (td,  $J = 7.6, 0.8$  Hz, 1H), 6.84 (d,  $J = 8.0$  Hz, 1H), 5.34 (s, 1H), 4.83 (s, 2H), 3.45 (s, 6H), 3.42 (s, 1H);  $^{13}\text{C}$  NMR (100 MHz,  $\text{CDCl}_3$ )  $\delta$  153.79, 136.71, 130.20, 126.07, 121.56, 120.94, 116.56, 115.89, 103.22, 85.00, 76.48, 63.84, 54.91; HRMS (EI) calcd. for  $\text{C}_{14}\text{H}_{14}\text{O}_3$  ( $\text{M}$ ) $^+$ : 230.0943, Found: 230.0948.

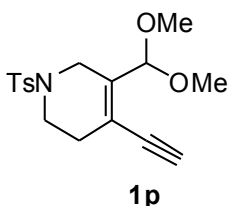

$^1\text{H}$  NMR (400 MHz,  $\text{CDCl}_3$ )  $\delta$  7.67 (d,  $J = 8.0$  Hz, 2H), 7.31 (d,  $J = 8.0, 2\text{H}$ ), 5.22 (s, 1H), 3.70 (s, 2H), 3.37 (s, 6H), 3.19-3.14 (m, 3H), 2.43 (s, 3H), 2.42-2.39 (m, 2H);  $^{13}\text{C}$  NMR (100 MHz,  $\text{CDCl}_3$ )  $\delta$  143.64, 139.03, 133.03, 129.70, 127.73, 116.92, 103.66, 82.65, 80.35, 55.26, 42.74, 42.37, 29.80, 21.50; HRMS (ESI) calcd. for  $\text{C}_{17}\text{H}_{21}\text{N}_1\text{O}_4\text{NaS}$  ( $\text{M} + \text{Na}$ ) $^+$ : 358.1084, Found: 358.1090.

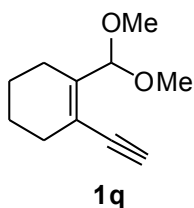

$^1\text{H}$  NMR (400 MHz,  $\text{CDCl}_3$ )  $\delta$  5.24 (s, 1H), 3.39 (s, 6H), 3.11 (s, 1H), 2.26-2.19 (m, 2H), 2.18-2.09 (m, 2H), 1.68-1.57 (m, 24);  $^{13}\text{C}$  NMR (100 MHz,  $\text{CDCl}_3$ )  $\delta$  143.40, 118.85, 105.07, 82.58, 80.80, 55.13, 30.16, 22.18, 22.07, 21.56; HRMS (EI) calcd. for  $\text{C}_{11}\text{H}_{16}\text{O}_2$  ( $\text{M}$ ) $^+$ : 180.1150, Found: 180.1149.

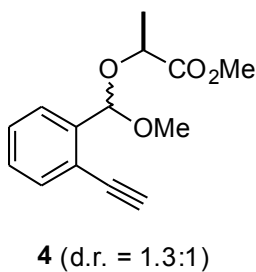

$^1\text{H}$  NMR (400 MHz,  $\text{CDCl}_3$ )  $\delta$  7.66 (d,  $J = 6.4$  Hz, 1H), 7.53-7.48 (m, 1H), 7.39 (t,  $J = 6.8$  Hz, 1H), 7.30 (t,  $J = 7.6$  Hz, 1H), 5.93 and 5.86 (s, 1H in a ratio of 1:1.3), 3.69 (s, 3H), 3.44 and 3.33 (s, 3H in a ratio of 1.3:1), 3.32 (s, 1H), 1.43 and 1.42 (d,  $J = 6.8$  Hz, 3H in a ratio of 1.3:1);  $^{13}\text{C}$  NMR (100 MHz,  $\text{CDCl}_3$ )  $\delta$  173.44, 173.29, 139.70, 139.63, 132.94, 132.78, 128.99, 128.73, 126.61, 128.46, 126.74, 126.36, 121.14, 120.81, 100.96, 100.26, 81.93, 81.91, 89.81, 79.89, 70.15, 54.68, 53.47, 51.88, 51.81, 18.69, 18.58; HRMS (ESI) calcd. for  $\text{C}_{14}\text{H}_{16}\text{O}_4\text{K}$  ( $\text{M} + \text{K}$ ) $^+$ : 287.0680, Found: 287.0680.

## 6. Spectral Data of Products

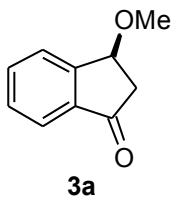

Colorless oil, 92% yield.  $^1\text{H}$  NMR (400 MHz,  $\text{CDCl}_3$ )  $\delta$  7.75 (d,  $J = 7.6$  Hz, 1H), 7.70-7.63 (m, 2H), 7.50-7.45 (m, 1H), 5.62 (dd,  $J = 6.4, 2.8$  Hz, 1H), 3.49 (s, 3H), 2.98 (dd,  $J = 14.4, 6.4$  Hz, 1H), 2.64 (dd,  $J = 14.4, 2.8$  Hz, 1H);  $^{13}\text{C}$  NMR (100 MHz,  $\text{CDCl}_3$ )  $\delta$  202.98, 153.12, 136.76, 134.96, 129.52, 126.45, 123.22, 76.67, 57.14, 43.38; HRMS (ESI) calcd. for  $\text{C}_{10}\text{H}_{11}\text{O}_2$  ( $\text{M} + \text{H}$ ) $^+$ : 163.0754, Found: 163.0754. HPLC (Chiralpak IC column, 90:10 hexanes/isopropanol, 1 ml/min), tr = 12.0 min (minor), 12.6 min (major); ee = 95%.



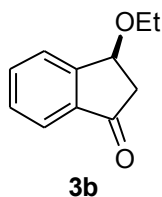

Colorless oil, 90% yield.  $^1\text{H}$  NMR (400 MHz,  $\text{CDCl}_3$ )  $\delta$  7.74 (d,  $J = 8.0$  Hz, 1H), 7.71-7.63 (m, 2H), 7.47 (t,  $J = 7.2$  Hz, 1H), 5.10 (dd,  $J = 6.4$ , 2.8 Hz, 1H), 3.73-3.65 (m, 2H), 3.01 (dd,  $J = 18.4$ , 6.4 Hz, 1H), 2.65 (dd,  $J = 18.8$ , 2.8 Hz, 1H), 1.28 (t,  $J = 6.8$  Hz, 3H);  $^{13}\text{C}$  NMR (100 MHz,  $\text{CDCl}_3$ )  $\delta$  203.20, 153.55, 136.71, 134.98, 129.38, 126.47, 123.17, 75.16, 65.29, 44.14, 15.43; HRMS (ESI) calcd. for  $\text{C}_{11}\text{H}_{13}\text{O}_2$  ( $\text{M} + \text{H}$ ) $^+$ : 177.0910, Found: 177.0911. HPLC (Chiralpak IC column, 90:10 hexanes/isopropanol, 1 ml/min),  $t_r = 9.5$  min (minor), 10.6 min (major); ee = 90%.

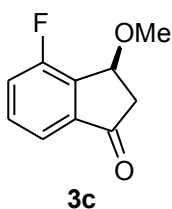

White solid, 96% yield.  $^1\text{H}$  NMR (400 MHz,  $\text{CDCl}_3$ )  $\delta$  7.60 (d,  $J = 7.6$  Hz, 1H), 7.52 (td,  $J = 7.6$ , 4.4 Hz, 1H), 7.37 (t,  $J = 7.6$  Hz, 1H), 5.24 (dd,  $J = 6.4$ , 2.0 Hz, 1H), 3.54 (d,  $J = 1.2$  Hz, 1H), 3.02 (dd,  $J = 19.2$ , 6.8 Hz, 1H), 2.75 (dd,  $J = 19.2$ , 2.0 Hz, 1H);  $^{13}\text{C}$  NMR (100 MHz,  $\text{CDCl}_3$ )  $\delta$  202.16 (d,  $J = 15$  Hz), 160.43 (d,  $J = 252.9$  Hz), 138.20 (d,  $J = 33$  Hz), 138.55 (d,  $J = 17.9$  Hz), 131.88 (d,  $J = 6.4$  Hz), 121.69 (d,  $J = 20$  Hz), 119.30 (d,  $J = 48$  Hz), 74.17, 57.52 (d,  $J = 2.0$  Hz), 43.59; HRMS (ESI) calcd. for  $\text{C}_{10}\text{H}_{10}\text{O}_5\text{F}$  ( $\text{M} + \text{H}$ ) $^+$ : 181.0659, Found: 181.0661. HPLC (Chiralpak IC column, 95:05 hexanes/isopropanol, 1 ml/min),  $t_r = 12.8$  min (minor), 13.5 min (major); ee = 94%.

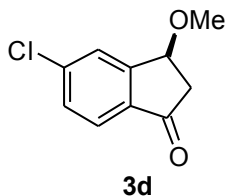

White solid, 90% yield.  $^1\text{H}$  NMR (400 MHz,  $\text{CDCl}_3$ )  $\delta$  7.72-7.69 (m, 2H), 7.48 (dd,  $J = 8.0$ , 1.6 Hz, 1H), 5.01 (dd,  $J = 6.4$ , 2.8 Hz, 1H), 3.53 (s, 3H), 3.03 (dd,  $J = 18.8$ , 6.4 Hz, 1H), 2.69 (dd,  $J = 18.8$ , 3.2 Hz, 1H);  $^{13}\text{C}$  NMR (100 MHz,  $\text{CDCl}_3$ )  $\delta$  201.33, 154.65, 141.55, 135.18, 130.30, 126.79, 124.47, 76.25, 57.37, 43.54; HRMS (ESI) calcd. for  $\text{C}_{10}\text{H}_{10}\text{O}_2\text{Cl}$  ( $\text{M} + \text{H}$ ) $^+$ : 197.0364, Found: 197.0365. HPLC (Chiralpak IC column, 90:10 hexanes/isopropanol, 1 ml/min),  $t_r = 9.1$  min (major), 9.9 min (minor); ee = 89%.

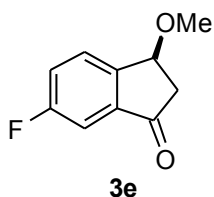

Light color solid, 94% yield.  $^1\text{H}$  NMR (400 MHz,  $\text{CDCl}_3$ )  $\delta$  7.69-7.64 (m, 1H), 7.39-7.30 (m, 2H), 4.98 (dd,  $J = 6.4$ , 2.0 Hz, 1H), 3.48 (s, 3H), 3.02 (dd,  $J = 18.8$ , 6.4 Hz, 1H), 2.68 (dd,  $J = 18.8$ , 2.8 Hz, 1H);  $^{13}\text{C}$  NMR (100 MHz,  $\text{CDCl}_3$ )  $\delta$  201.73 (d,  $J = 3.8$  Hz), 163.60 (d,  $J = 249.1$  Hz), 148.77 (d,  $J = 1.8$  Hz), 138.75 (d,  $J = 7.4$  Hz), 128.19 (d,  $J = 8.6$  Hz), 122.61 (d,  $J = 23.1$  Hz), 109.14 (d,  $J = 22.1$  Hz), 76.12, 57.17, 43.96; HRMS (ESI) calcd. for  $\text{C}_{10}\text{H}_{10}\text{O}_2\text{F}$  ( $\text{M} + \text{H}$ ) $^+$ : 181.0659, Found: 181.0660. HPLC (Chiralpak IC column, 95:05 hexanes/isopropanol, 1 ml/min),  $t_r = 10.7$  min (minor), 11.3 min (major); ee = 83%.

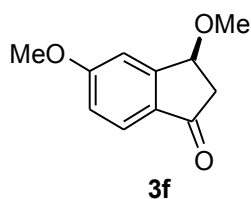

Yellow powder, 95% yield.  $^1\text{H}$  NMR (400 MHz,  $\text{CDCl}_3$ )  $\delta$  7.66 (d,  $J = 8.4$  Hz, 1H), 7.09 (s, 1H), 6.98 (dd,  $J = 8.4, 2.0$  Hz, 1H), 4.95 (dd,  $J = 6.4, 2.8$  Hz, 1H), 3.89 (s, 3H), 3.47 (s, 3H), 2.95 (dd,  $J = 18.4, 6.4$  Hz, 1H), 2.62 (dd,  $J = 18.4, 2.8$  Hz, 1H);  $^{13}\text{C}$  NMR (100 MHz,  $\text{CDCl}_3$ )  $\delta$  201.05, 165.52, 156.12, 130.01, 124.88, 117.76, 109.06, 76.48, 57.00, 55.71, 43.43; HRMS (ESI) calcd. for  $\text{C}_{11}\text{H}_{13}\text{O}_3$  ( $\text{M} + \text{H}$ ) $^+$ : 193.0859, Found: 193.0859. HPLC (Chiralpak IC column, 80:20 hexanes/isopropanol, 1 ml/min),  $t_r = 13.3$  min (major), 15.4 min (minor); ee = 85%

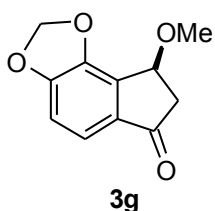

Yellow powder, 80% yield.  $^1\text{H}$  NMR (400 MHz,  $\text{CDCl}_3$ )  $\delta$  7.36 (d,  $J = 8.0$  Hz, 1H), 6.94 (d,  $J = 8.4$  Hz, 1H), 6.16 (d,  $J = 0.8$  Hz, 1H), 6.10 (d,  $J = 0.8$  Hz, 1H), 5.08 (dd,  $J = 6.8, 2.4$  Hz, 1H), 3.51 (s, 3H), 2.96 (dd,  $J = 18.8, 6.8$  Hz, 1H), 2.65 (dd,  $J = 18.8, 2.4$  Hz, 1H);  $^{13}\text{C}$  NMR (100 MHz,  $\text{CDCl}_3$ )  $\delta$  200.81, 153.26, 144.37, 132.35, 132.33, 118.81, 110.38, 102.52, 74.08, 57.41, 43.79; HRMS (ESI) calcd. for  $\text{C}_{11}\text{H}_{11}\text{O}_4$  ( $\text{M} + \text{H}$ ) $^+$ : 207.0652, Found: 207.0652. HPLC (Chiralpak IC column, 80:20 hexanes/isopropanol, 1 ml/min),  $t_r = 16.8$  min (major), 26.6 min (minor); ee = 91%.

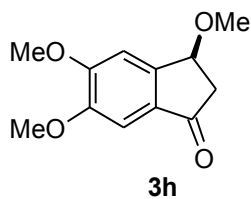

Yellow powder, 92% yield.  $^1\text{H}$  NMR (400 MHz,  $\text{CDCl}_3$ )  $\delta$  7.15 (s, 1H), 7.08 (s, 1H), 4.99 (dd,  $J = 6.4, 2.4$  Hz, 1H), 3.99 (s, 3H), 3.91 (s, 3H), 3.46 (s, 3H), 2.95 (dd,  $J = 18.4, 6.4$  Hz, 1H), 2.61 (dd,  $J = 18.4, 2.4$  Hz, 1H);  $^{13}\text{C}$  NMR (100 MHz,  $\text{CDCl}_3$ )  $\delta$  201.50, 155.69, 151.03, 148.35, 130.00, 107.06, 103.58, 76.52, 56.95, 56.36, 56.20, 43.30; HRMS (ESI) calcd. for  $\text{C}_{12}\text{H}_{15}\text{O}_4$  ( $\text{M} + \text{H}$ ) $^+$ : 223.0965, Found: 223.0965. HPLC (Chiralpak IC column, 80:20 hexanes/isopropanol, 1 ml/min),  $t_r = 20.5$  min (major), 21.9 min (minor); ee = 98%.

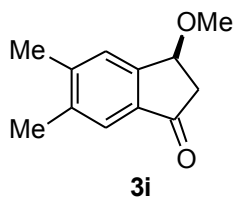

Yellow solid, 97% yield.  $^1\text{H}$  NMR (400 MHz,  $\text{CDCl}_3$ )  $\delta$  7.50 (s, 1H), 7.44 (s, 1H), 4.96 (dd,  $J = 6.0, 2.4$  Hz, 1H), 3.47 (s, 3H), 2.94 (dd,  $J = 18.4, 6.4$  Hz, 1H), 2.60 (dd,  $J = 18.4, 2.8$  Hz, 1H), 2.36 (s, 3H), 2.31 (s, 3H);  $^{13}\text{C}$  NMR (100 MHz,  $\text{CDCl}_3$ )  $\delta$  202.81, 151.33, 145.28, 138.67, 134.98, 127.04, 123.55, 76.3, 57.00, 43.53, 20.74, 19.90; HRMS (ESI) calcd. for  $\text{C}_{12}\text{H}_{15}\text{O}_2$  ( $\text{M} + \text{H}$ ) $^+$ : 191.1067, Found: 191.1068. HPLC (Chiralpak IA column, 98:02 hexanes/isopropanol, 1 ml/min),  $t_r = 12.5$  min (major), 13.9 min (minor); ee = 99%

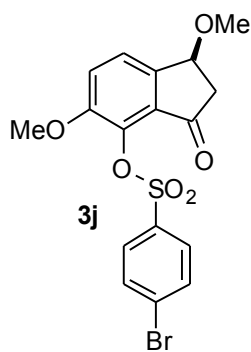

Yellow powder, 85% yield.  $^1\text{H}$  NMR (400 MHz,  $\text{CDCl}_3$ )  $\delta$  7.84 (d,  $J = 8.8$  Hz, 2H), 7.69 (d,  $J = 8.8$  Hz, 2H), 7.55 (d,  $J = 8.4$  Hz, 1H), 7.25 (d,  $J = 8.4$  Hz, 1H), 4.91 (dd,  $J = 6.4, 2.8$  Hz, 1H), 3.67 (s, 3H), 3.45 (s, 3H), 2.95 (dd,  $J = 18.4, 6.4$  Hz, 1H), 2.62 (dd,  $J = 18.4, 2.8$  Hz, 1H);  $^{13}\text{C}$  NMR (100 MHz,  $\text{CDCl}_3$ )  $\delta$  198.45, 153.00, 145.65, 136.12, 132.68, 132.00, 130.80, 130.03, 129.12, 125.92, 119.82, 75.43, 57.10, 56.52, 44.48; HRMS (ESI) calcd. for  $\text{C}_{17}\text{H}_{15}\text{O}_6\text{BrKS}$  ( $\text{M} + \text{H}$ ) $^+$ : 464.9404, Found: 464.9405. HPLC (Chiralpak IA column, 90:10 hexanes/isopropanol, 1 ml/min), tr = 18.5 min (minor), 23.0 min (major); ee = 97%

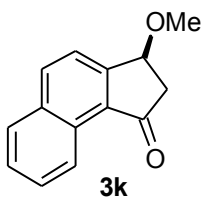

White solid, 94% yield.  $^1\text{H}$  NMR (400 MHz,  $\text{CDCl}_3$ )  $\delta$  9.13 (d,  $J = 8.4$  Hz, 1H), 8.10 (d,  $J = 8.4$  Hz, 1H), 7.90 (d,  $J = 8.0$  Hz, 1H), 7.71 (d,  $J = 8.4$  Hz, 1H), 7.68 (d,  $J = 8.0$  Hz, 1H), 7.59 (t,  $J = 8.0$  Hz, 1H), 5.09 (dd,  $J = 6.4, 2.4$  Hz, 1H), 3.53 (s, 3H), 3.10 (dd,  $J = 18.4, 6.4$  Hz, 1H), 2.78 (dd,  $J = 18.4, 2.4$  Hz, 1H);  $^{13}\text{C}$  NMR (100 MHz,  $\text{CDCl}_3$ )  $\delta$  203.26, 155.60, 136.13, 133.65, 131.17, 129.09, 128.66, 128.16, 127.28, 124.66, 122.87, 76.31, 57.14, 43.82; HRMS (ESI) calcd. for  $\text{C}_{14}\text{H}_{13}\text{O}_2$  ( $\text{M} + \text{H}$ ) $^+$ : 213.0910, Found: 213.0911. HPLC (Chiralpak IC column, 85:15 hexanes/isopropanol, 1 ml/min), tr = 10.1 min (minor), 15.1 min (major); ee = 99%

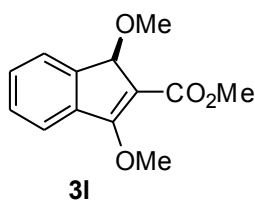

Colorless oil, 97% yield.  $^1\text{H}$  NMR (400 MHz,  $\text{CDCl}_3$ )  $\delta$  7.55-7.49 (m, 2H), 7.45-7.38 (m, 2H), 5.48 (s, 1H), 4.30 (s, 3H), 3.87 (s, 3H), 3.14 (s, 3H);  $^{13}\text{C}$  NMR (100 MHz,  $\text{CDCl}_3$ )  $\delta$  165.05, 164.98, 141.51, 138.45, 129.46, 128.80, 124.05, 120.79, 106.91, 81.21, 61.37, 52.25, 51.58; HRMS (ESI) calcd. for  $\text{C}_{13}\text{H}_{15}\text{O}_4$  ( $\text{M} + \text{H}$ ) $^+$ : 235.0965, Found: 235.0967. HPLC (Chiralpak IA column, 98:02 hexanes/isopropanol, 1 ml/min), tr = 10.1 min (major), 15.1 min (minor); ee = 60%

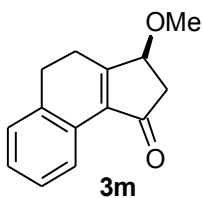

Yellow powder, 83% yield.  $^1\text{H}$  NMR (400 MHz,  $\text{CDCl}_3$ )  $\delta$  8.26-8.20 (m, 1H), 7.26-7.18 (m, 3H), 4.55 (d,  $J = 6.0$  Hz, 1H), 3.45 (s, 3H), 3.00-2.94 (m, 2H), 2.91-2.81 (m, 2H), 2.69-2.49 (m, 2H);  $^{13}\text{C}$  NMR (100 MHz,  $\text{CDCl}_3$ )  $\delta$  201.99, 170.51, 136.43, 135.18, 128.57, 128.27, 127.66, 126.74, 124.85, 77.67, 57.13, 42.44, 27.46, 23.60; HRMS (ESI) calcd. for  $\text{C}_{14}\text{H}_{15}\text{O}_2$  ( $\text{M} + \text{H}$ ) $^+$ : 215.1067, Found: 215.1068. HPLC (Chiralpak IC column, 80:10 hexanes/isopropanol, 1 ml/min), tr = 13.8 min (minor), 16.1 min (major); ee = 98%

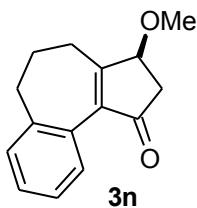

Yellow powder, 79% yield.  $^1\text{H}$  NMR (400 MHz,  $\text{CDCl}_3$ )  $\delta$  7.79 (dd,  $J = 7.6, 1.2$  Hz, 1H), 7.28 (td,  $J = 7.2, 1.6$  Hz, 1H), 7.23 (td,  $J = 7.2, 1.6$  Hz, 1H), 7.18 (dd,  $J = 7.2, 1.6$  Hz, 1H), 4.48 (dd,  $J = 6.0, 2.0$  Hz, 1H), 3.45 (s, 3H), 2.87-2.76 (m, 2H), 2.71-2.60 (m, 2H), 2.60-2.49 (m, 2H), 2.21-2.12 (m, 2H);  $^{13}\text{C}$  NMR (100 MHz,  $\text{CDCl}_3$ )  $\delta$  203.21, 172.59, 142.55, 139.22, 129.90, 129.32, 128.86, 128.20, 125.99, 79.18, 57.14, 41.40, 33.70, 29.75, 29.30; HRMS (ESI) calcd. for  $\text{C}_{15}\text{H}_{17}\text{O}_2$  ( $\text{M} + \text{H}$ ) $^+$ : 229.1223, Found: 229.1224. HPLC (Chiralpak IA column, 90:10 hexanes/isopropanol, 1 ml/min), tr = 6.7 min (minor), 7.1 min (major); ee = 94%

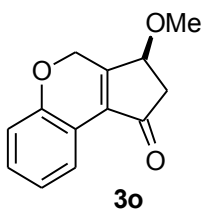

Yellow powder, 58% yield.  $^1\text{H}$  NMR (400 MHz,  $\text{CDCl}_3$ )  $\delta$  8.07 (dd,  $J = 8.0, 2.0$  Hz, 1H), 7.24 (td,  $J = 8.0, 1.6$  Hz, 1H), 6.97 (td,  $J = 7.2, 1.2$  Hz, 1H), 6.98 (dd,  $J = 8.0, 1.2$  Hz, 1H), 5.32 (d,  $J = 16.8$  Hz, 1H), 4.61 (dd,  $J = 5.6, 1.6$  Hz, 1H), 3.40 (s, 3H), 2.88 (dd,  $J = 18.0, 6.0$  Hz, 1H), 2.56 (dd,  $J = 18.0, 2.0$  Hz, 1H);  $^{13}\text{C}$  NMR (100 MHz,  $\text{CDCl}_3$ )  $\delta$  200.20, 160.70, 152.98, 132.96, 130.75, 125.03, 121.66, 116.33, 115.91, 76.38, 65.90, 57.28, 42.42; HRMS (EI) calcd. for  $\text{C}_{13}\text{H}_{12}\text{O}_3$  ( $\text{M}$ ) $^+$ : 216.0786, Found: 216.0785. HPLC (Chiralpak IC column, 80:10 hexanes/isopropanol, 1 ml/min), tr = 13.2 min (minor), 14.5 min (major); ee = 98%

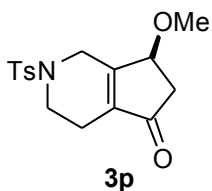

Yellow powder, 80% yield.  $^1\text{H}$  NMR (400 MHz,  $\text{CDCl}_3$ )  $\delta$  7.70 (d,  $J = 8.0$  Hz, 1H), 7.34 (d,  $J = 8.0$  Hz, 1H), 4.44 (d,  $J = 5.2$  Hz, 1H), 4.09 (d,  $J = 17.6$  Hz, 1H), 3.92 (d,  $J = 18.0$  Hz, 1H), 3.38 (s, 3H), 3.34-3.26 (m, 1H), 3.25-3.15 (m, 1H), 2.70 (dd,  $J = 18.4, 6.0$  Hz, 1H), 2.44 (s, 3H), 2.36-2.29 (m, 3H);  $^{13}\text{C}$  NMR (100 MHz,  $\text{CDCl}_3$ )  $\delta$  202.12, 163.92, 144.04, 138.99, 133.35, 129.91, 127.58, 77.47, 57.51, 45.18, 42.37, 41.44, 21.53, 20.45; HRMS (ESI) calcd. for  $\text{C}_{16}\text{H}_{20}\text{O}_4\text{N}_1\text{NS}_1$  ( $\text{M} + \text{H}$ ) $^+$ : 322.1108, Found: 322.1111. HPLC (Chiralpak IA column, 94:06 hexanes/isopropanol, 1 ml/min), tr = 42.2 min (major), 45.1 min (minor); ee = 84%

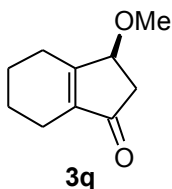

Colorless oil, 71% yield.  $^1\text{H}$  NMR (400 MHz,  $\text{CDCl}_3$ )  $\delta$  4.41-4.36 (m, 1H), 3.38 (s, 3H), 2.67 (dd,  $J = 18.0, 5.6$  Hz, 1H), 2.64-2.55 (m, 1H), 2.33 (dd,  $J = 18.0, 2.0$  Hz, 1H), 2.30-2.10 (m, 3H), 1.82-1.57 (m, 4H);  $^{13}\text{C}$  NMR (100 MHz,  $\text{CDCl}_3$ )  $\delta$  204.59, 170.34, 141.13, 79.14, 57.19, 41.21, 25.29, 21.93, 21.46, 19.79; HRMS (ESI) calcd. for  $\text{C}_{10}\text{H}_{15}\text{O}_2$  ( $\text{M} + \text{H}$ ) $^+$ : 167.1067, Found: 167.1068. HPLC (Chiralpak IC column, 80:10 hexanes/isopropanol, 1 ml/min), tr = 14.3 min (major), 15.0 min (minor); ee = 90%

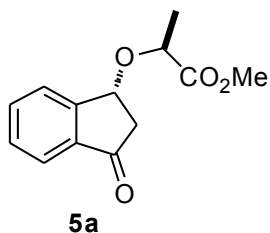

Colorless oil, d.r. = 5.0:1.  $^1\text{H}$  NMR (400 MHz,  $\text{CDCl}_3$ )  $\delta$  7.94 (d,  $J = 8.0$  Hz, 1H), 7.82-7.68 (m, 2H), 7.53 (t,  $J = 7.2$  Hz, 1H), 5.20 (dd,  $J = 6.0$ , 2.4 Hz, 1H), 4.28 (q,  $J = 6.8$  Hz, 1H), 3.86 (s, 3H), 3.06 (dd,  $J = 18.4$ , 6.4 Hz, 1H), 2.65 (dd,  $J = 18.4$ , 2.8 Hz, 1H), 1.50 (d,  $J = 6.8$  Hz, 3H);  $^{13}\text{C}$  NMR (100 MHz,  $\text{CDCl}_3$ )  $\delta$  202.64, 173.61, 153.09, 136.68, 134.27, 129.69, 127.15, 123.09, 74.77, 73.85, 52.15, 44.11, 19.20; HRMS (ESI) calcd. for  $\text{C}_{13}\text{H}_{15}\text{O}_4$  ( $\text{M} + \text{H}$ ) $^+$ : 235.0965, Found: 235.0967.

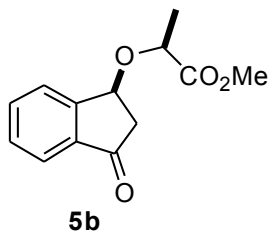

Colorless oil, d.r. = 6.6:1.  $^1\text{H}$  NMR (400 MHz,  $\text{CDCl}_3$ )  $\delta$  7.76 (d,  $J = 7.6$  Hz, 1H), 7.70-7.64 (m, 2H), 7.52-7.47 (m, 1H), 5.18 (dd,  $J = 6.4$ , 2.8 Hz, 1H), 4.36 (q,  $J = 6.8$  Hz, 1H), 3.78 (s, 3H), 3.02 (dd,  $J = 18.4$ , 6.4 Hz, 1H), 2.79 (dd,  $J = 18.8$ , 2.8 Hz, 1H), 1.51 (d,  $J = 6.8$  Hz, 3H);  $^{13}\text{C}$  NMR (100 MHz,  $\text{CDCl}_3$ )  $\delta$  202.76, 173.35, 152.83, 136.72, 134.93, 129.64, 126.43, 123.29, 75.54, 74.92, 52.16, 44.88, 18.76; HRMS (ESI) calcd. for  $\text{C}_{13}\text{H}_{15}\text{O}_4$  ( $\text{M} + \text{H}$ ) $^+$ : 235.0966, Found: 235.0966.

## 7. Spectral Data

$^1\text{H}$  NMR (400 MHz,  $\text{CDCl}_3$ ) and  $^{13}\text{C}$  NMR (100 MHz,  $\text{CDCl}_3$ ) of **1a**

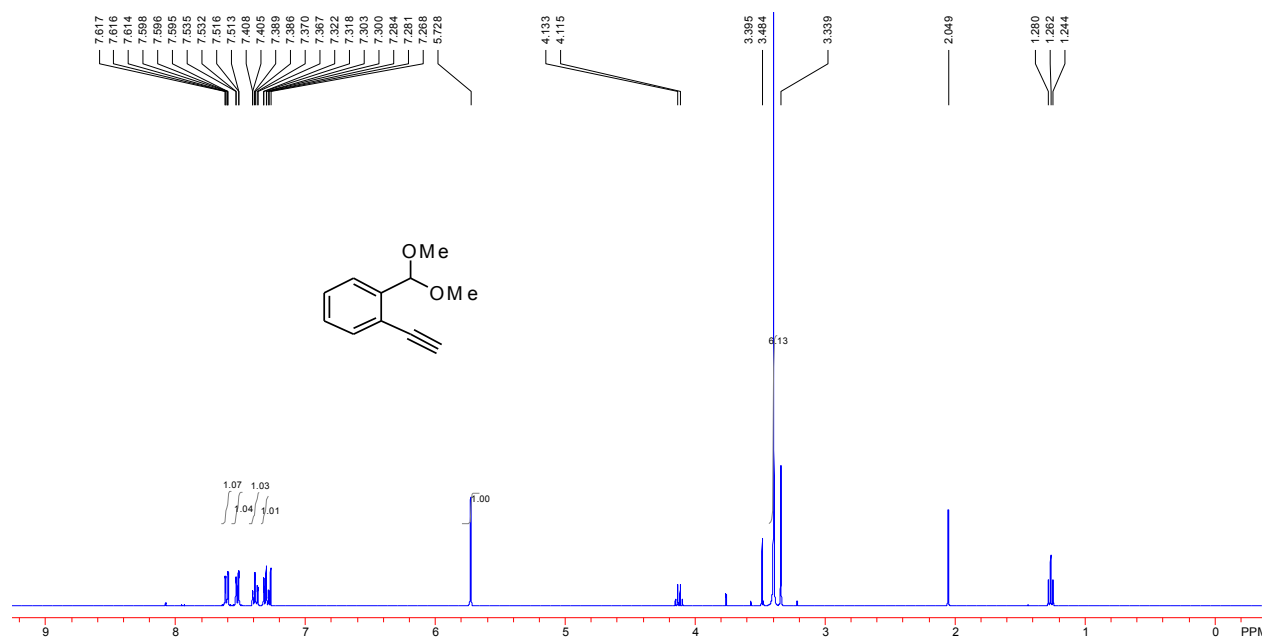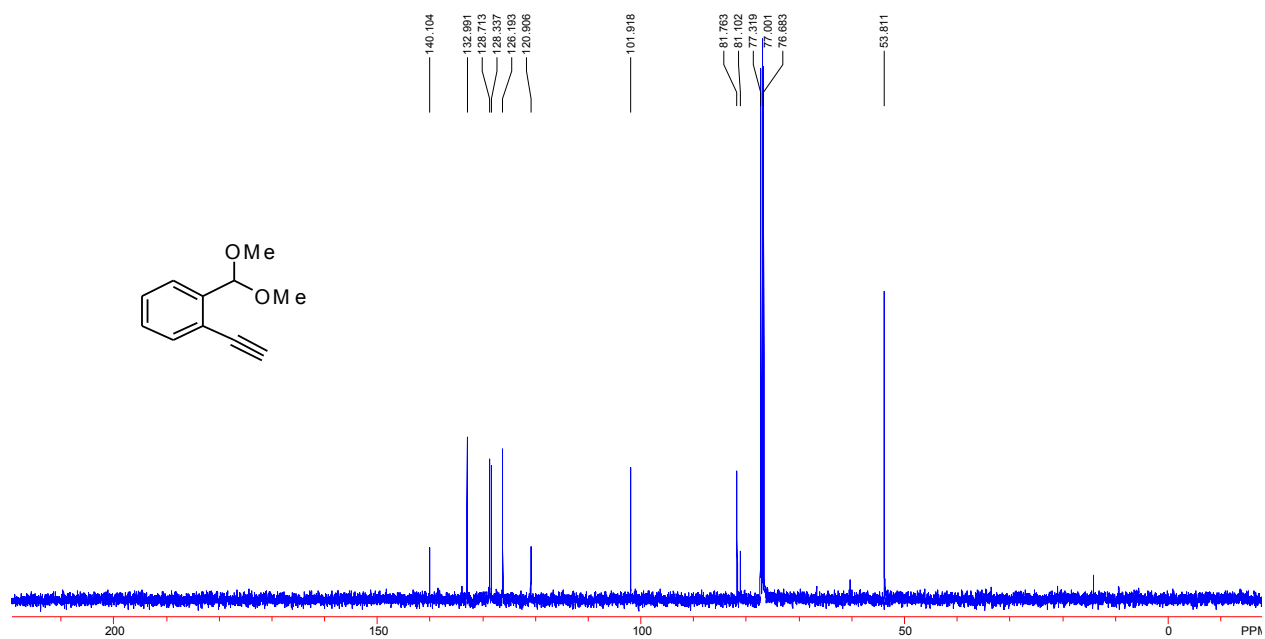

$^1\text{H}$  NMR (400 MHz,  $\text{CDCl}_3$ ) and  $^{13}\text{C}$  NMR (100 MHz,  $\text{CDCl}_3$ ) of **1b**

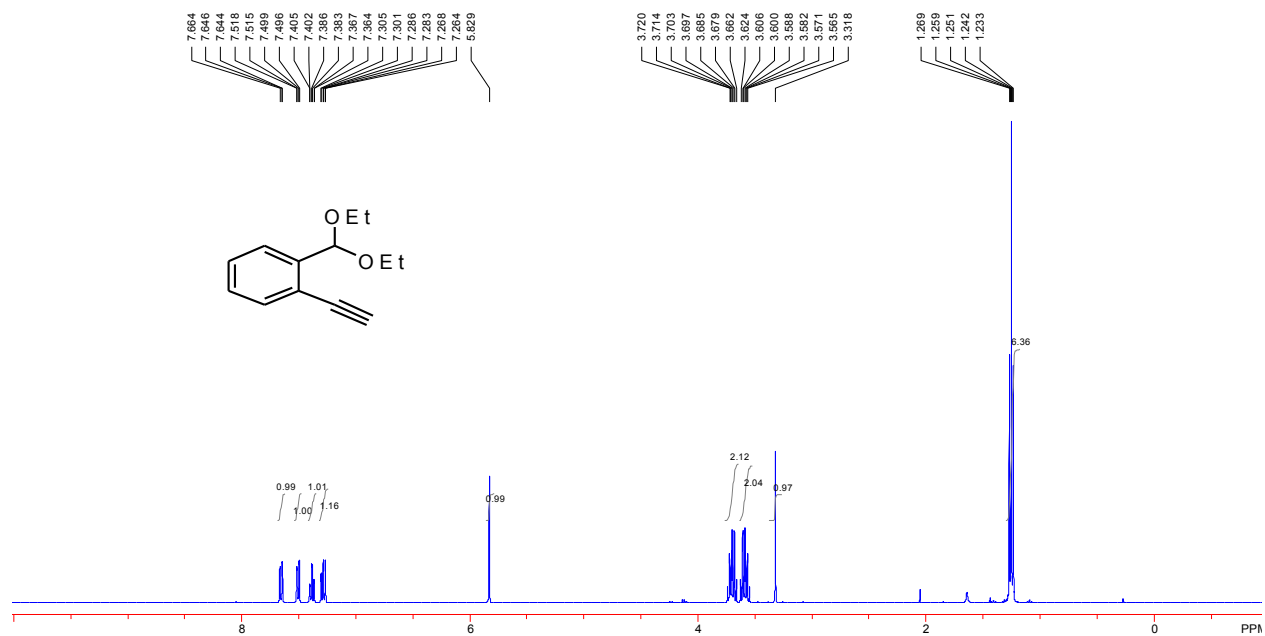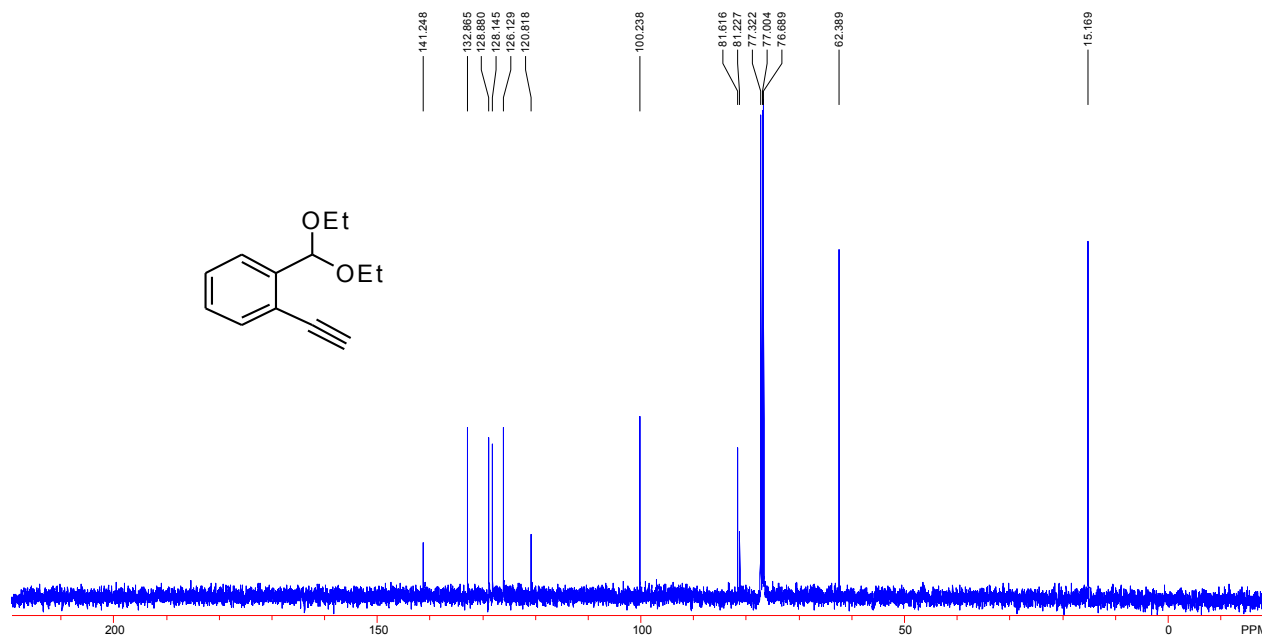

$^1\text{H}$  NMR (400 MHz,  $\text{CDCl}_3$ ) and  $^{13}\text{C}$  NMR (100 MHz,  $\text{CDCl}_3$ ) of **1c**

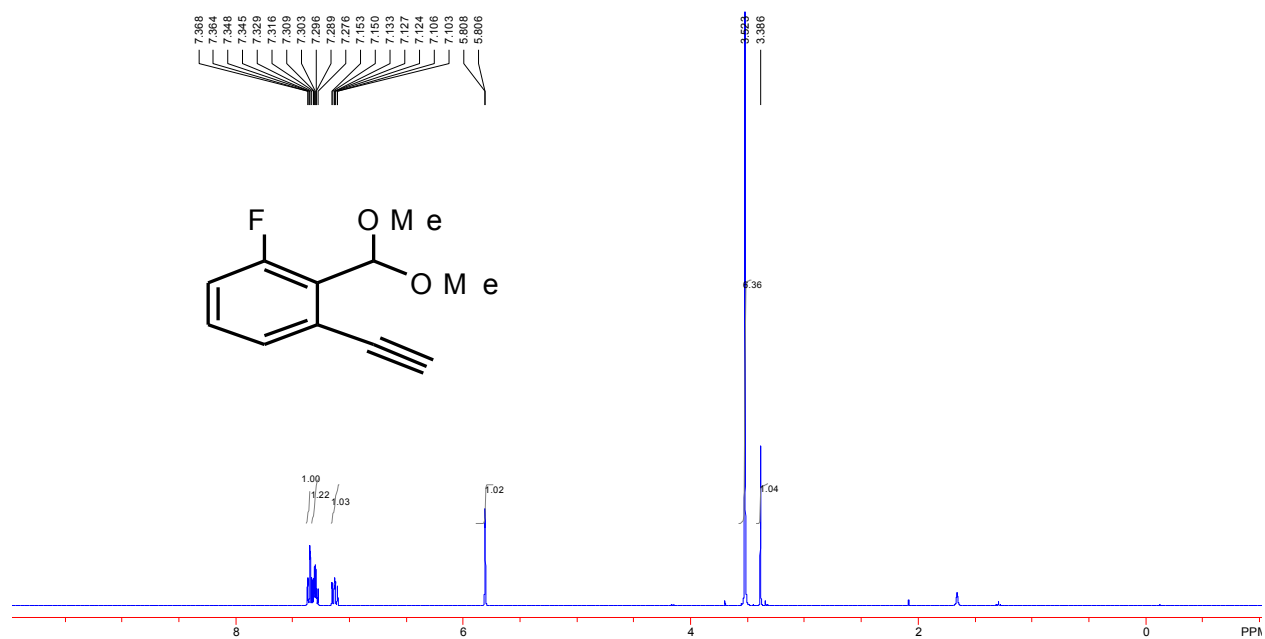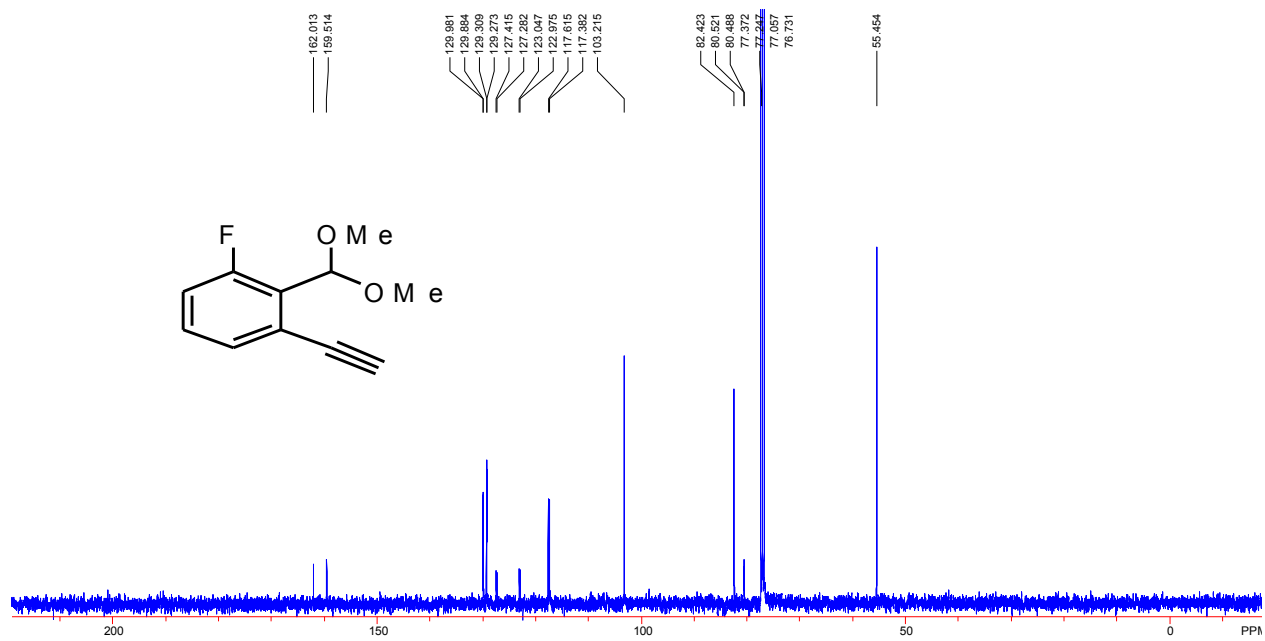



$^1\text{H}$  NMR (400 MHz,  $\text{CDCl}_3$ ) and  $^{13}\text{C}$  NMR (100 MHz,  $\text{CDCl}_3$ ) of **1d**

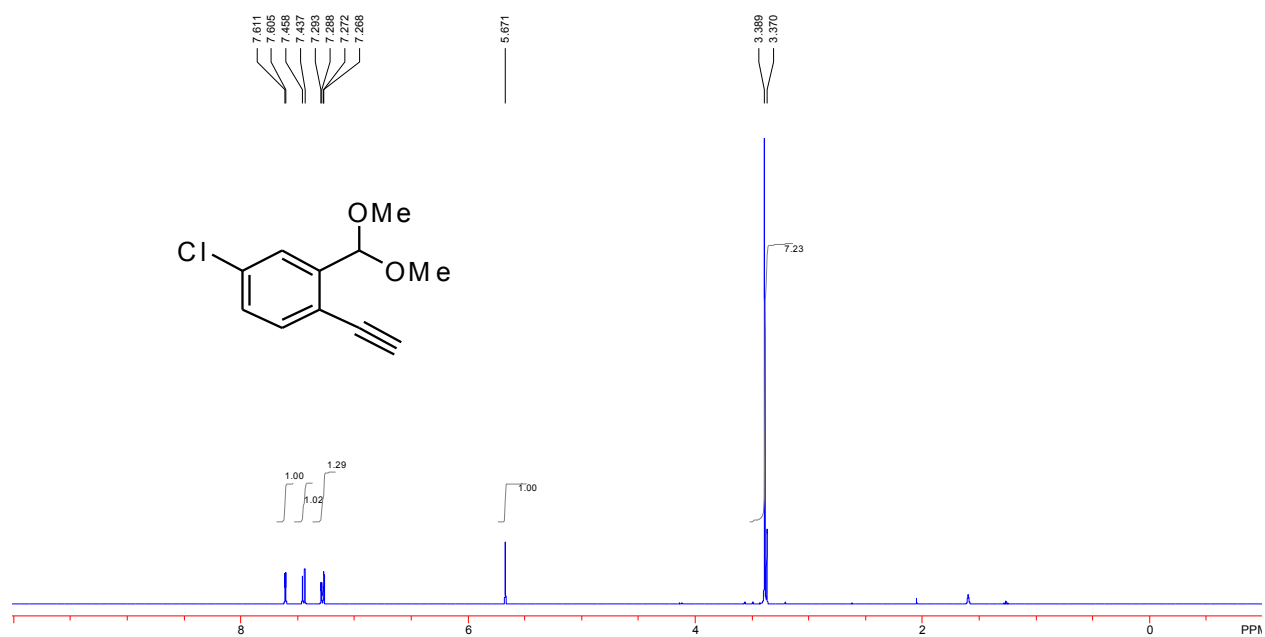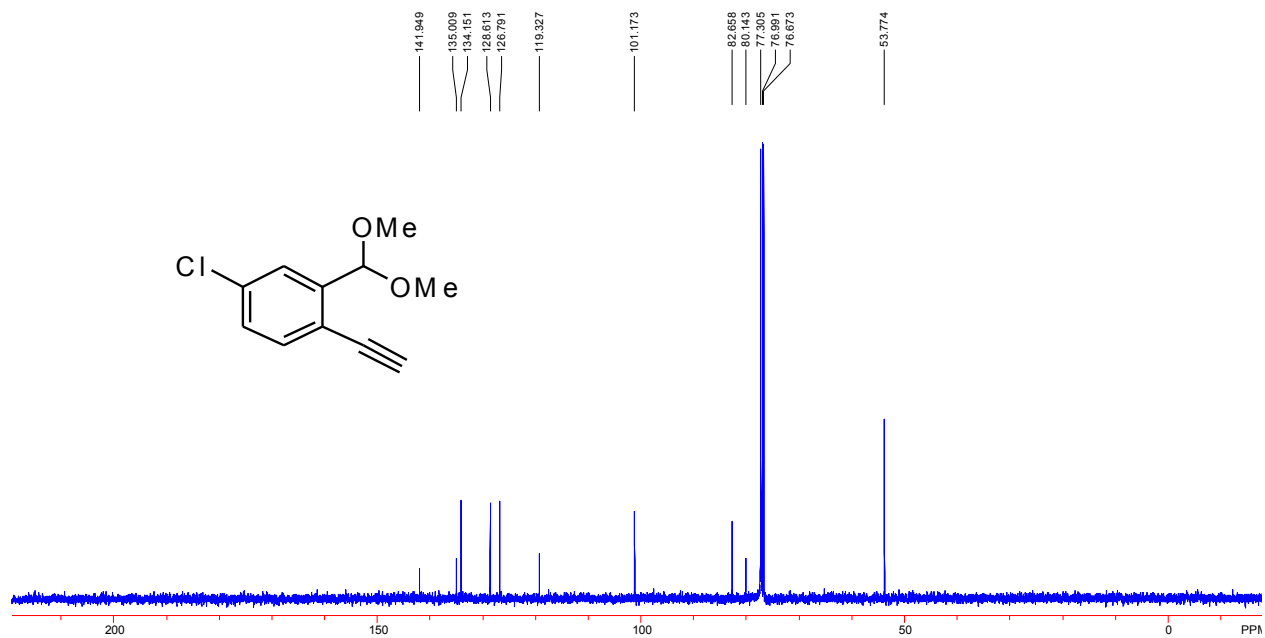

$^1\text{H}$  NMR (400 MHz,  $\text{CDCl}_3$ ) and  $^{13}\text{C}$  NMR (100 MHz,  $\text{CDCl}_3$ ) of **1e**

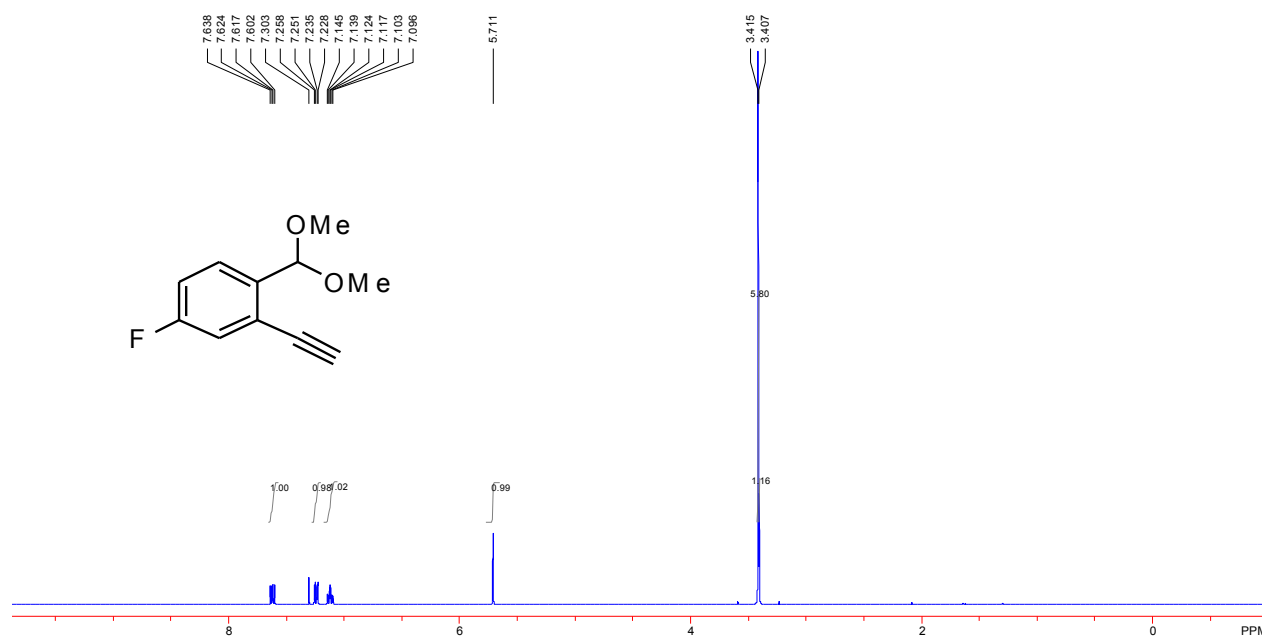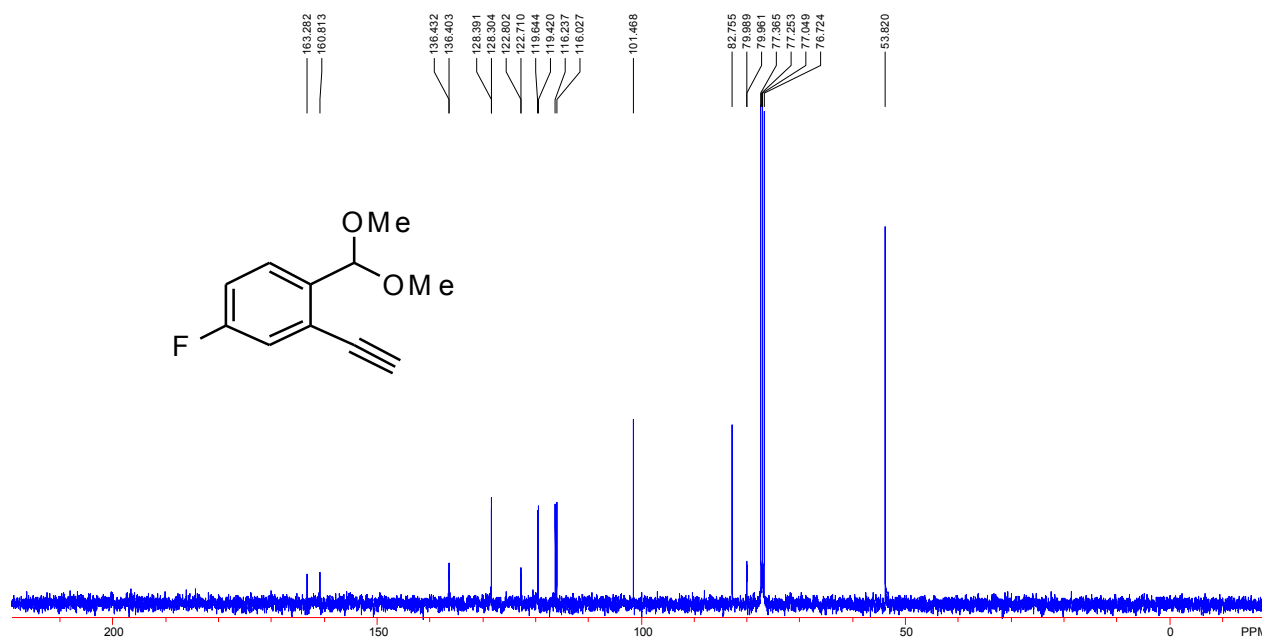

$^1\text{H}$  NMR (400 MHz,  $\text{CDCl}_3$ ) and  $^{13}\text{C}$  NMR (100 MHz,  $\text{CDCl}_3$ ) of **1f**

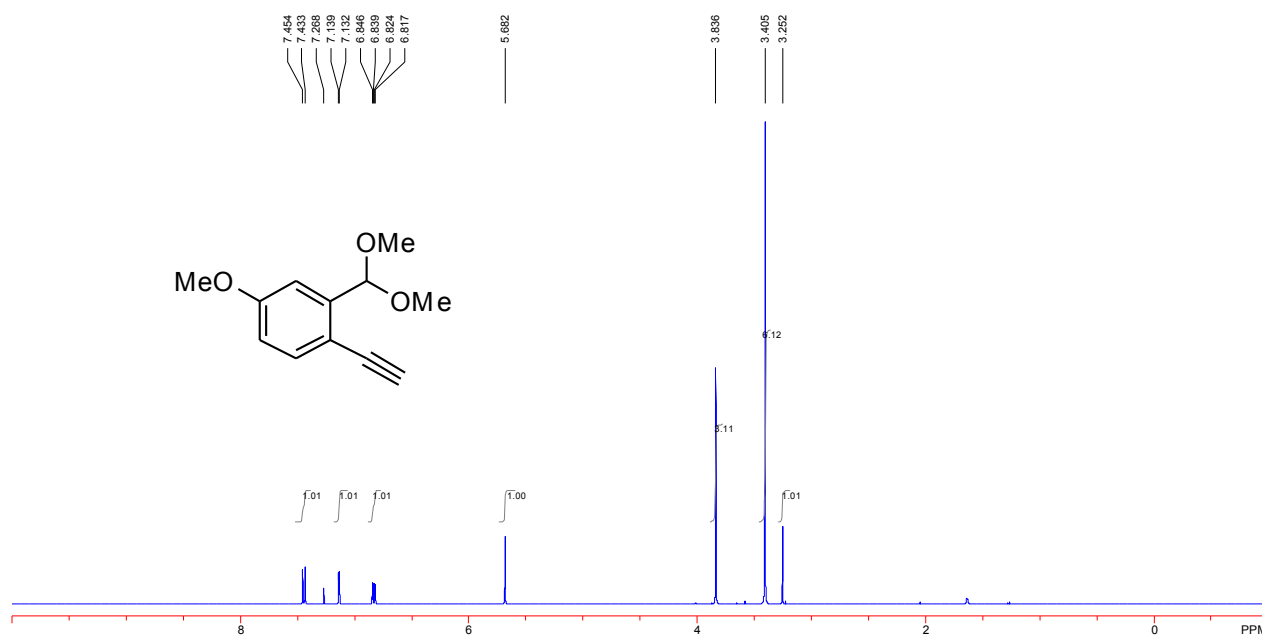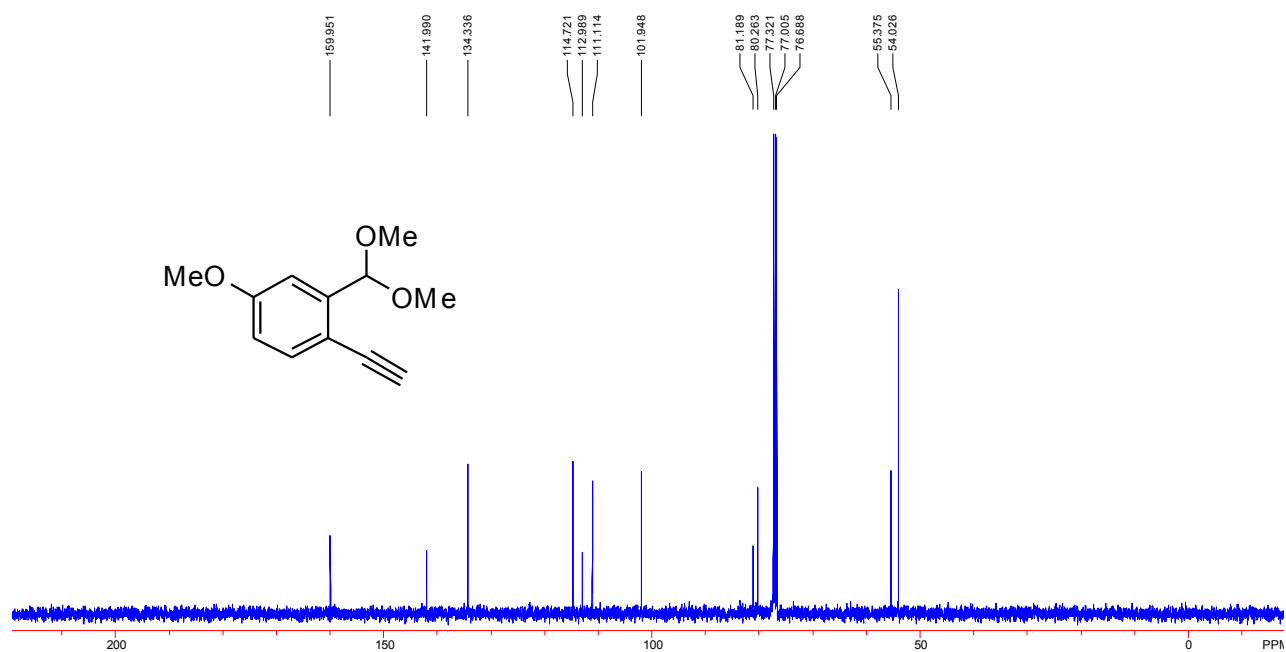

$^1\text{H}$  NMR (400 MHz,  $\text{CDCl}_3$ ) and  $^{13}\text{C}$  NMR (100 MHz,  $\text{CDCl}_3$ ) of **1g**

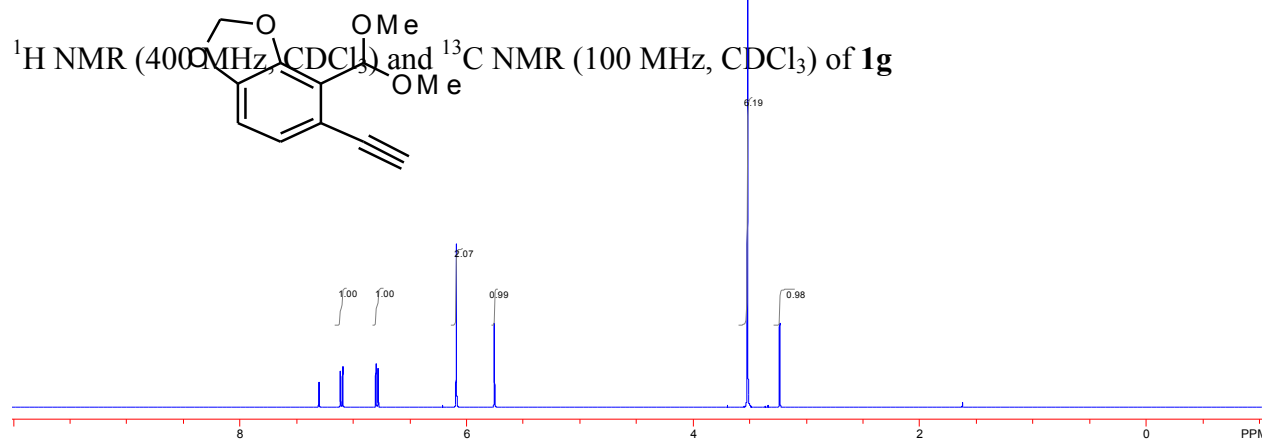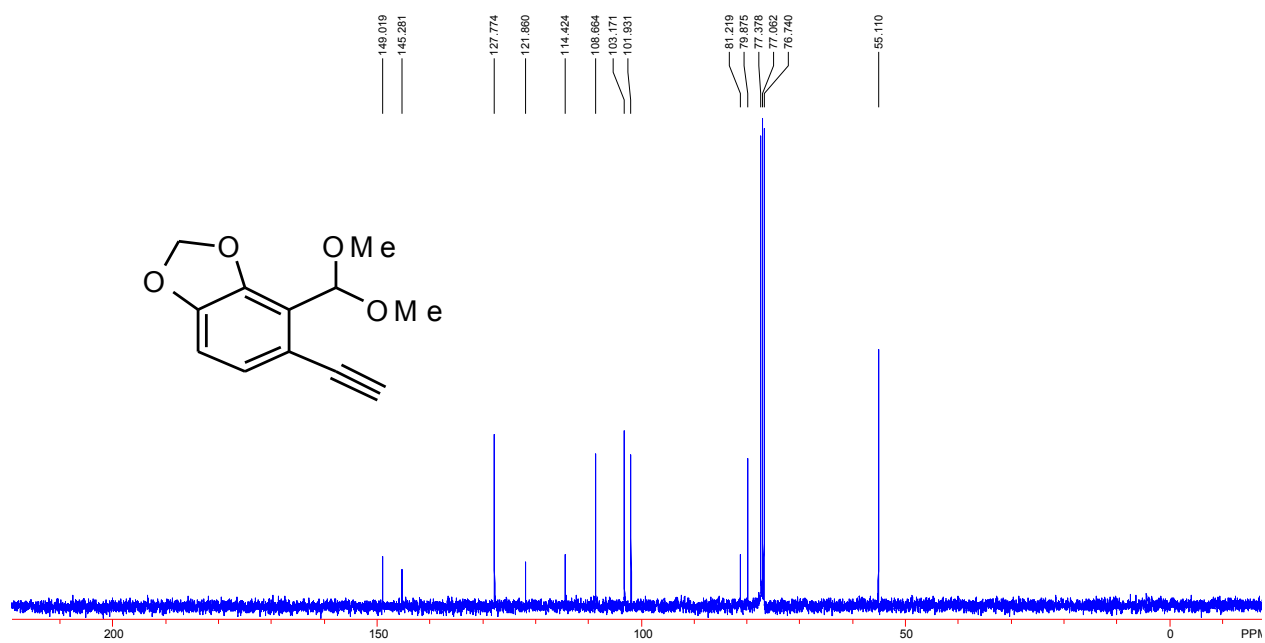

$^1\text{H}$  NMR (400 MHz,  $\text{CDCl}_3$ ) and  $^{13}\text{C}$  NMR (100 MHz,  $\text{CDCl}_3$ ) of **1h**

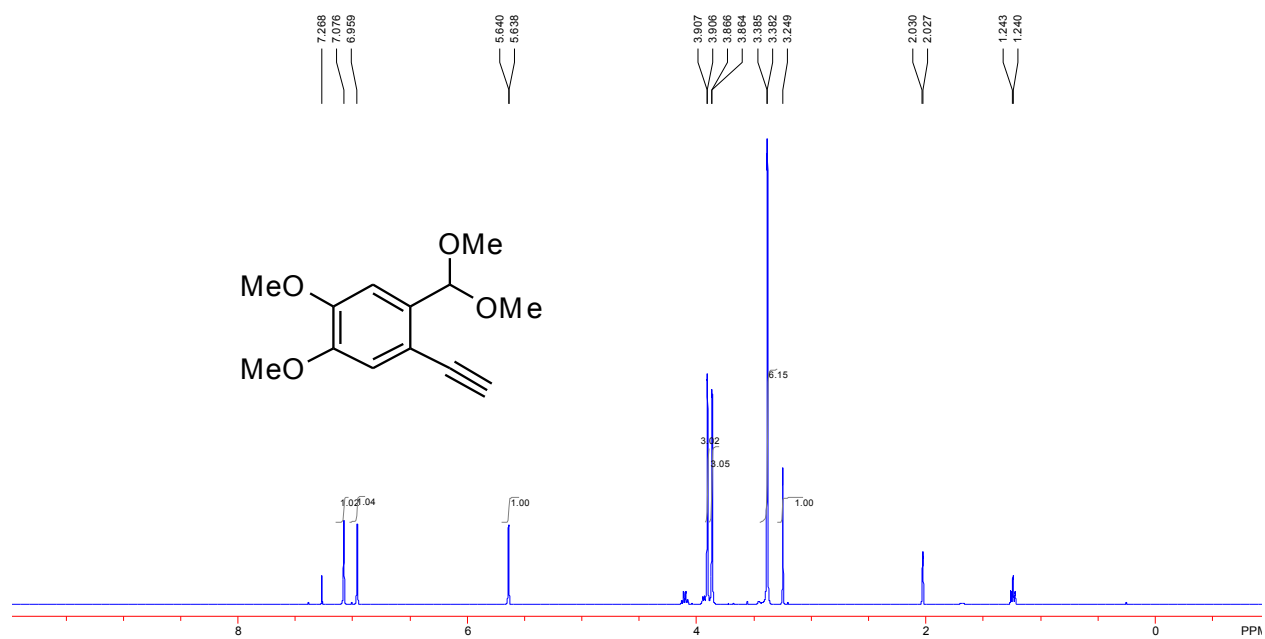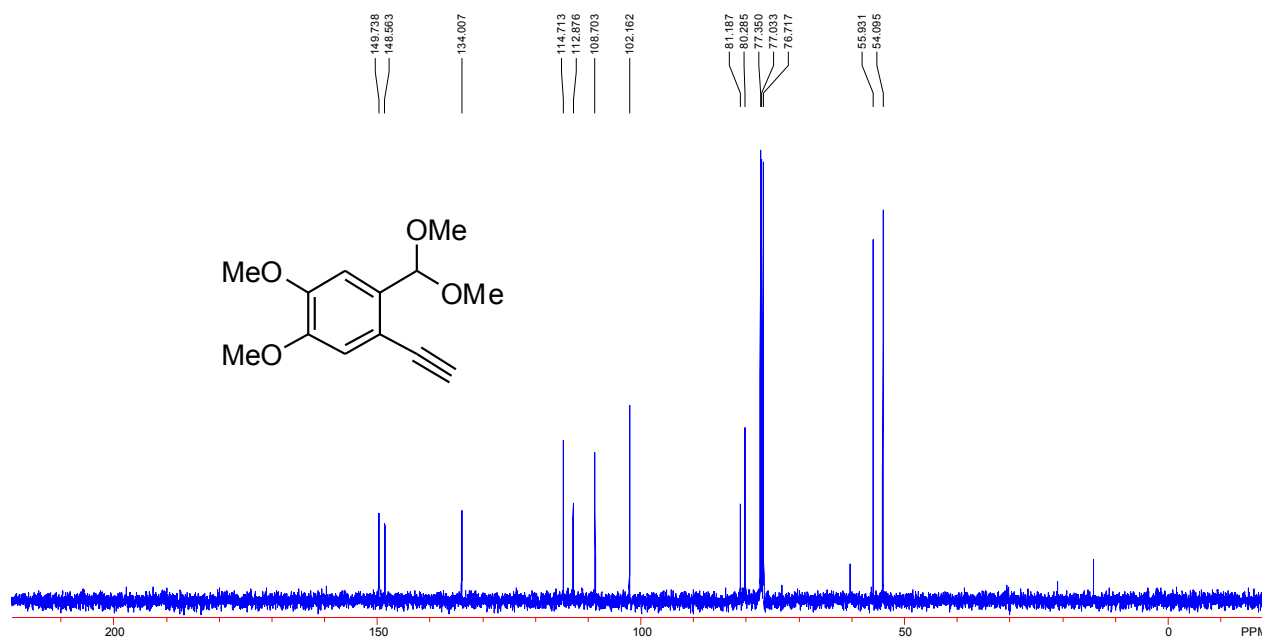

$^1\text{H}$  NMR (400 MHz,  $\text{CDCl}_3$ ) and  $^{13}\text{C}$  NMR (100 MHz,  $\text{CDCl}_3$ ) of **1i**

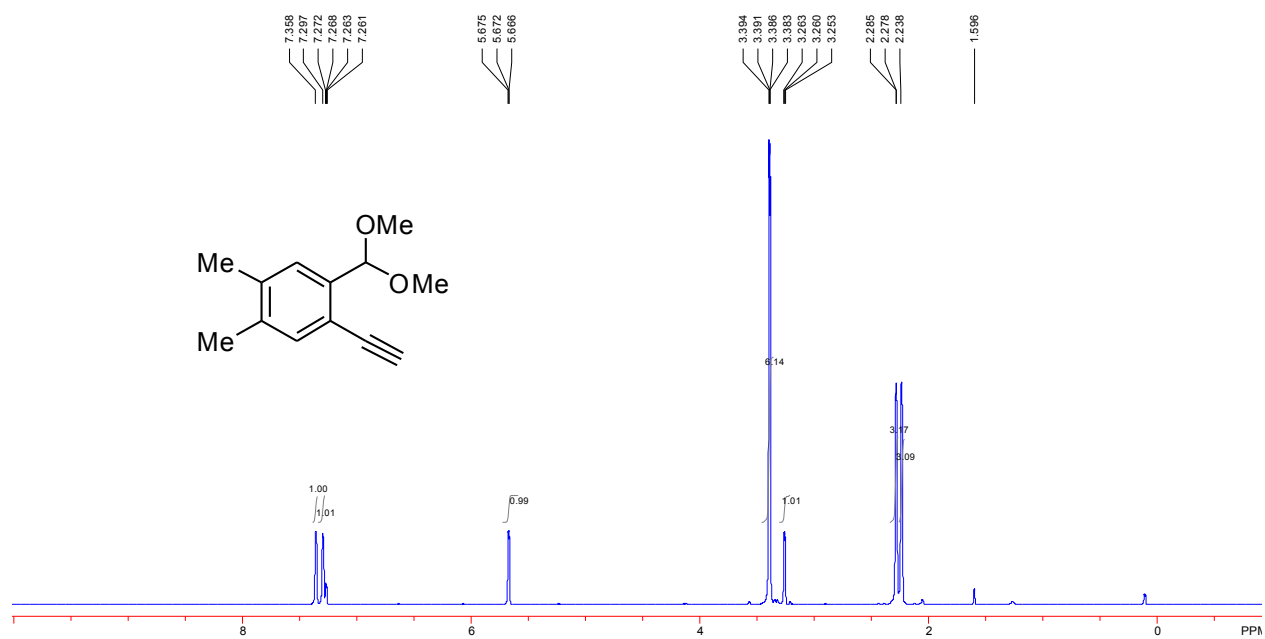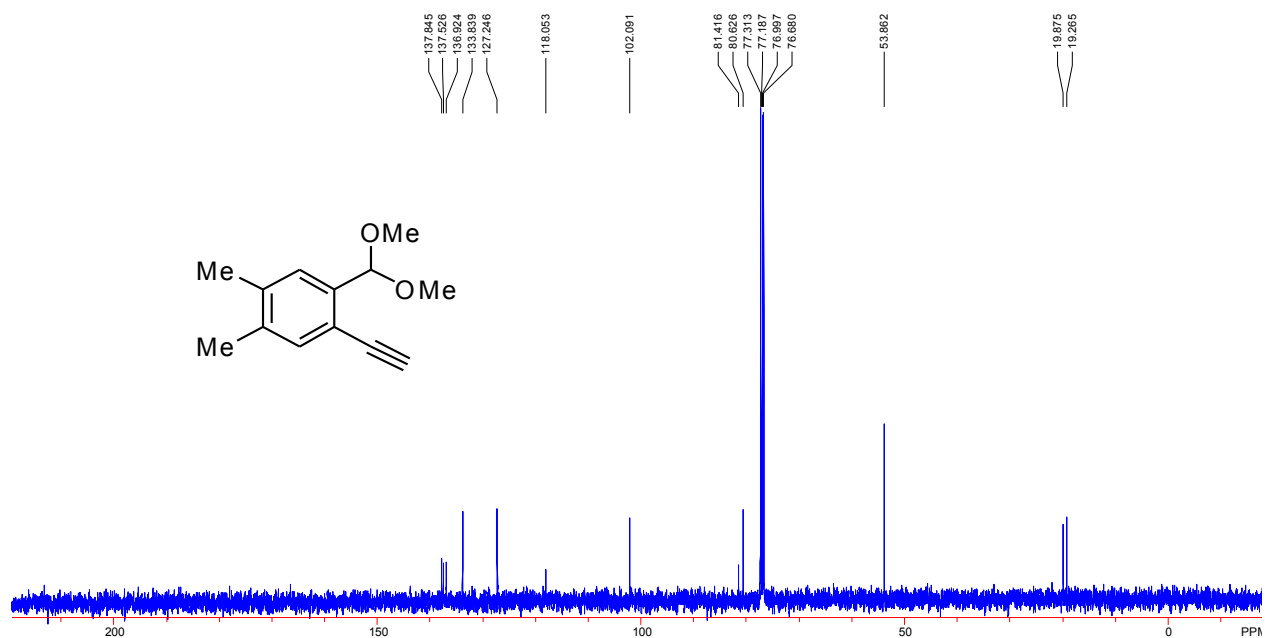

$^1\text{H}$  NMR (400 MHz,  $\text{CDCl}_3$ ) and  $^{13}\text{C}$  NMR (100 MHz,  $\text{CDCl}_3$ ) of **1j**

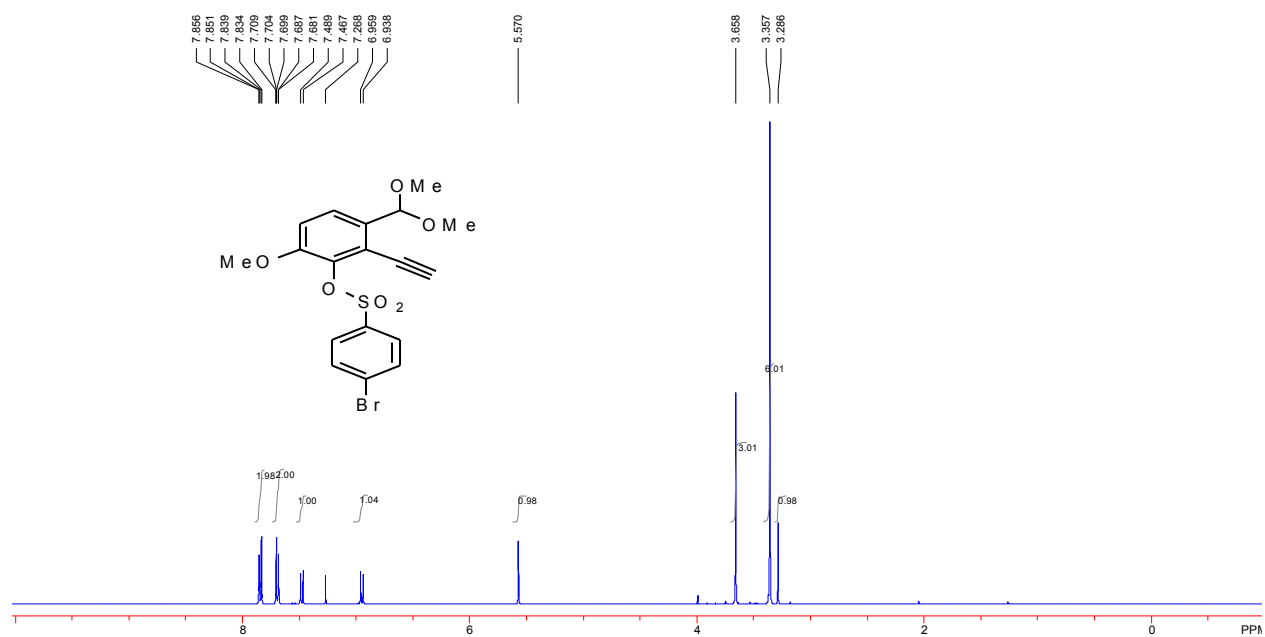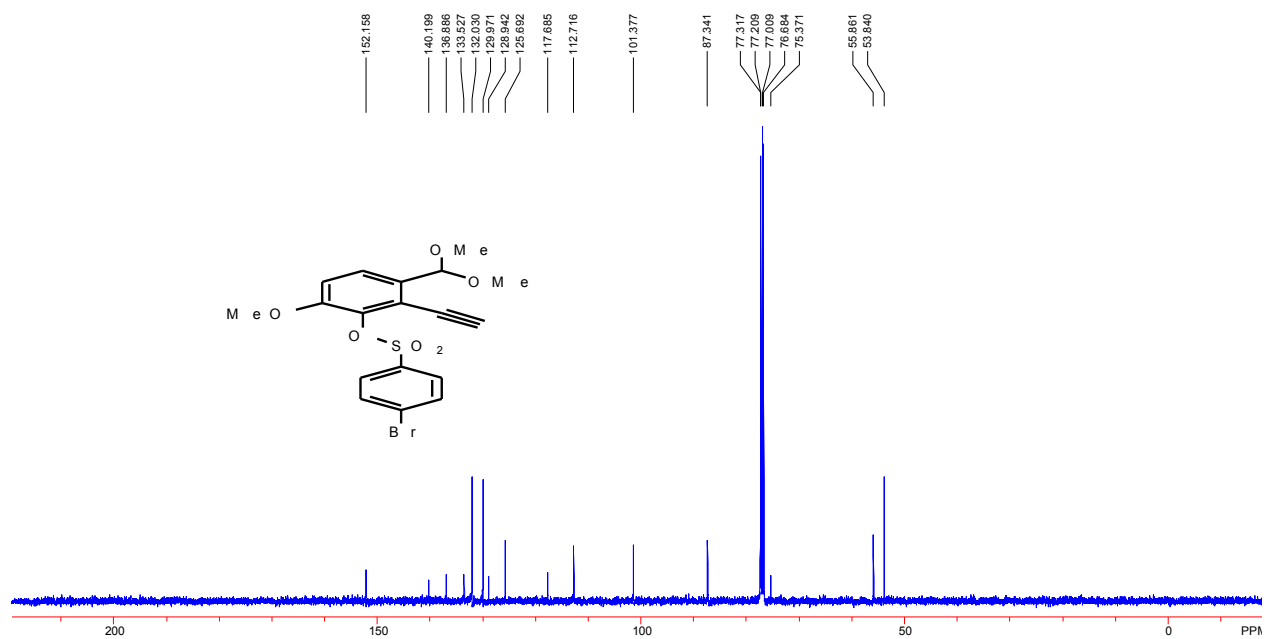

$^1\text{H}$  NMR (400 MHz,  $\text{CDCl}_3$ ) and  $^{13}\text{C}$  NMR (100 MHz,  $\text{CDCl}_3$ ) of **1k**

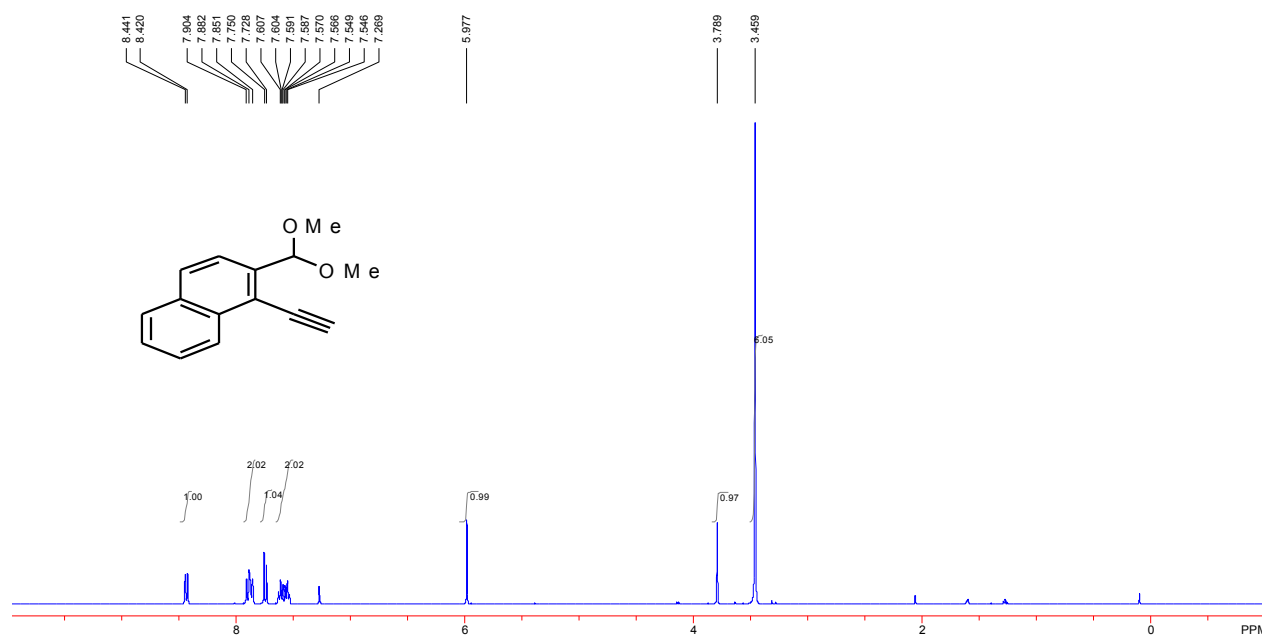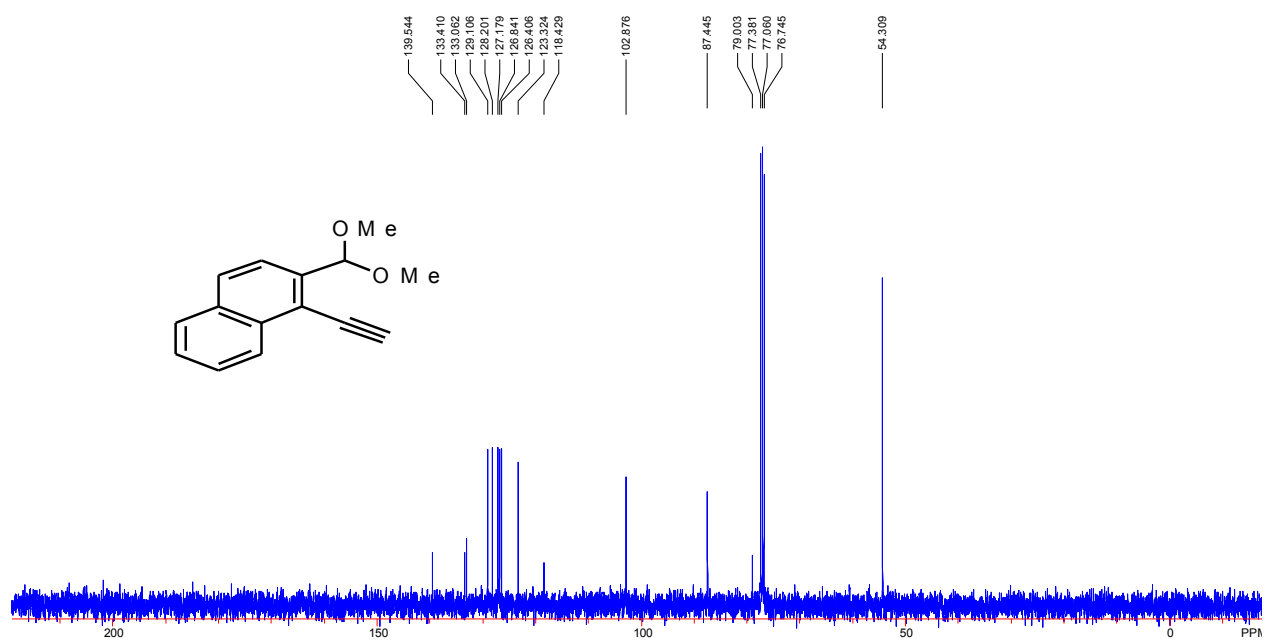



$^1\text{H}$  NMR (400 MHz,  $\text{CDCl}_3$ ) and  $^{13}\text{C}$  NMR (100 MHz,  $\text{CDCl}_3$ ) of **11**

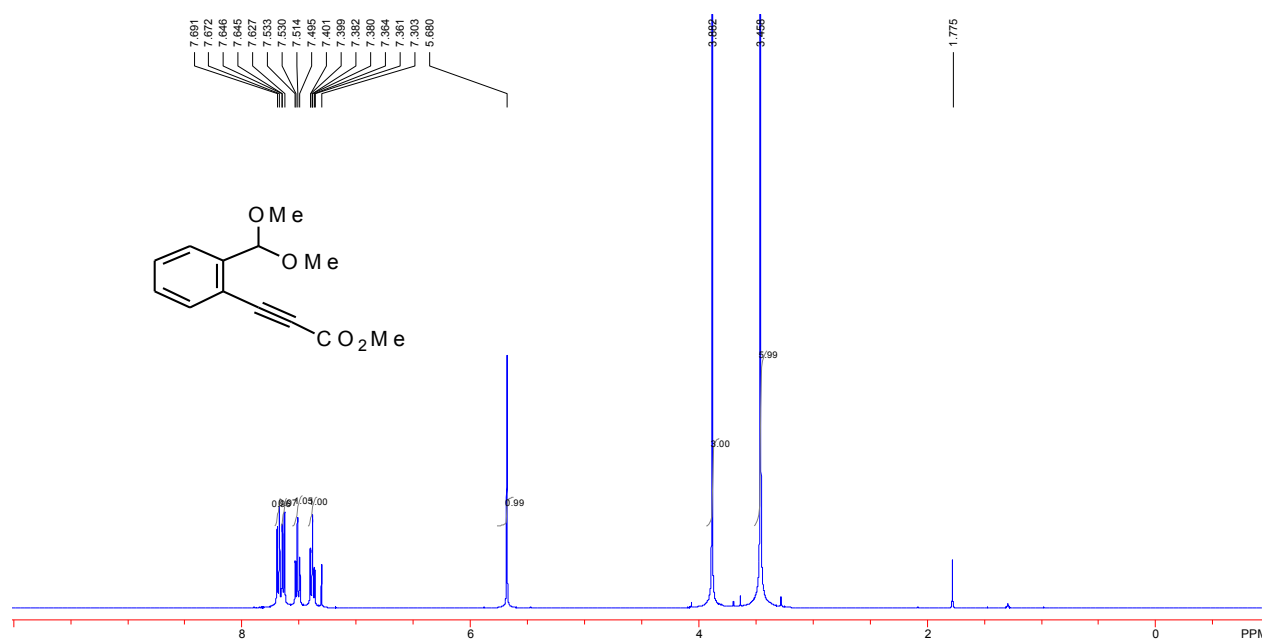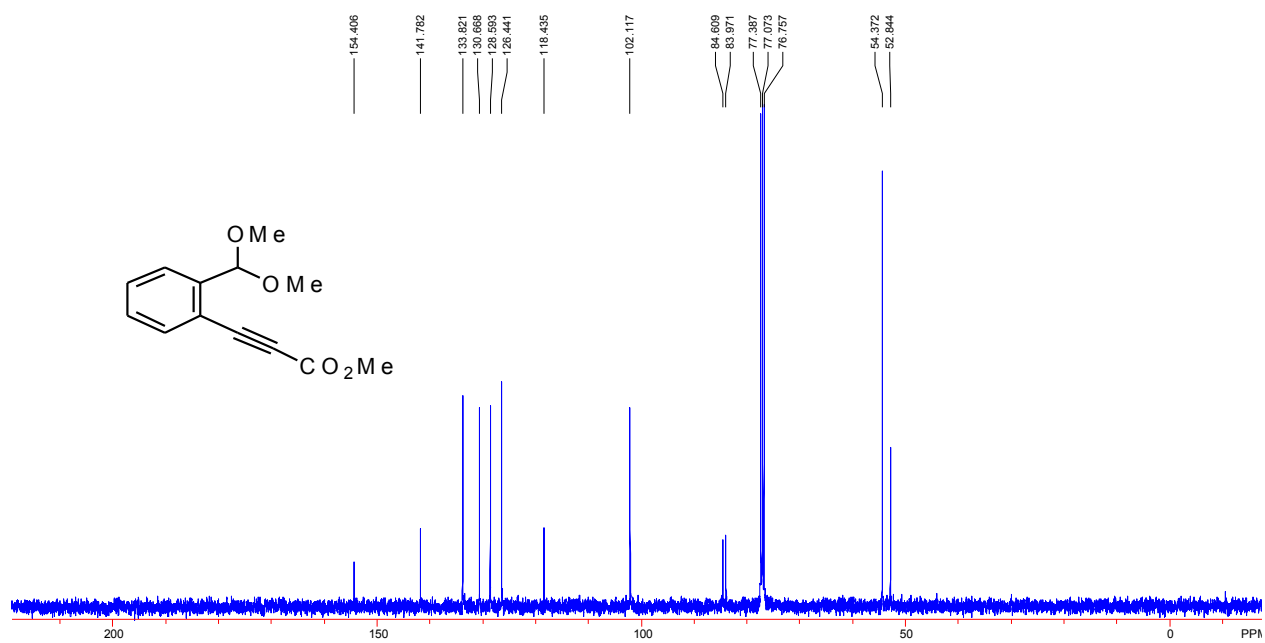

$^1\text{H}$  NMR (400 MHz,  $\text{CDCl}_3$ ) and  $^{13}\text{C}$  NMR (100 MHz,  $\text{CDCl}_3$ ) of **1m**

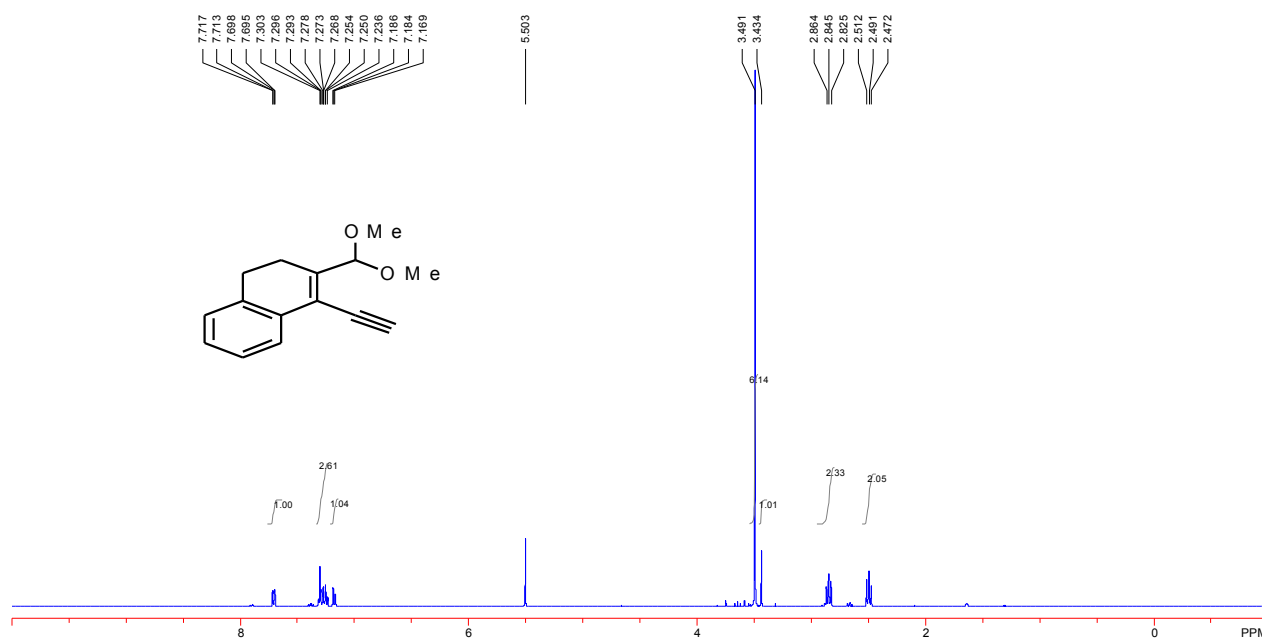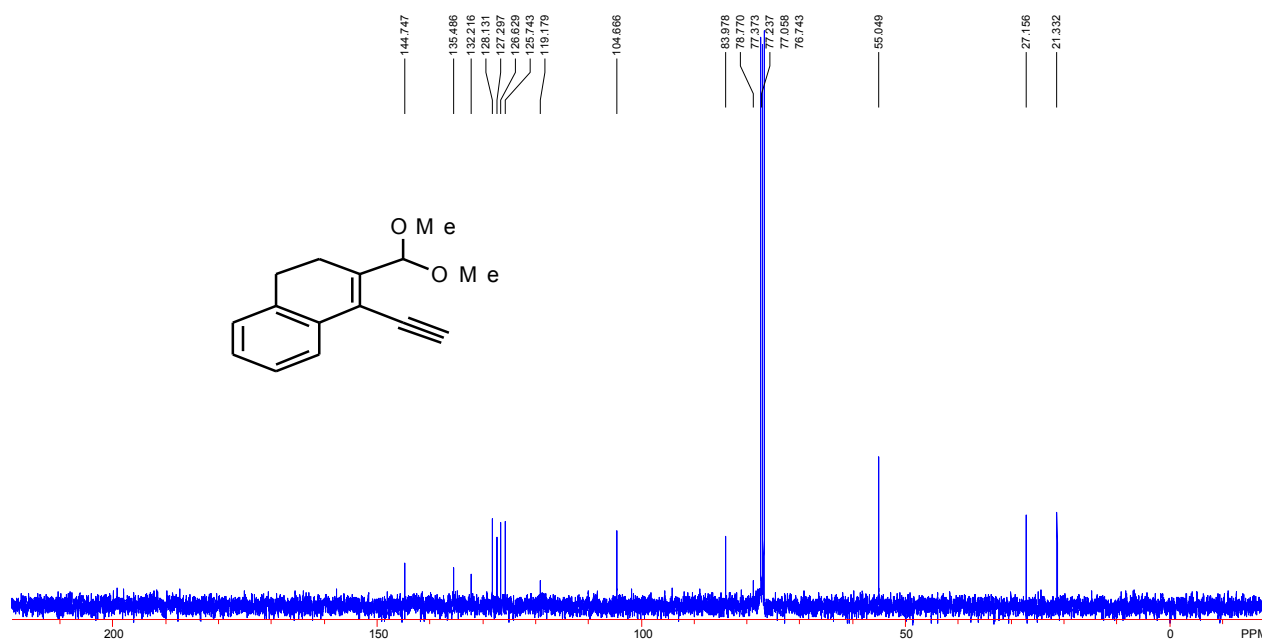

$^1\text{H}$  NMR (400 MHz,  $\text{CDCl}_3$ ) and  $^{13}\text{C}$  NMR (100 MHz,  $\text{CDCl}_3$ ) of **1n**

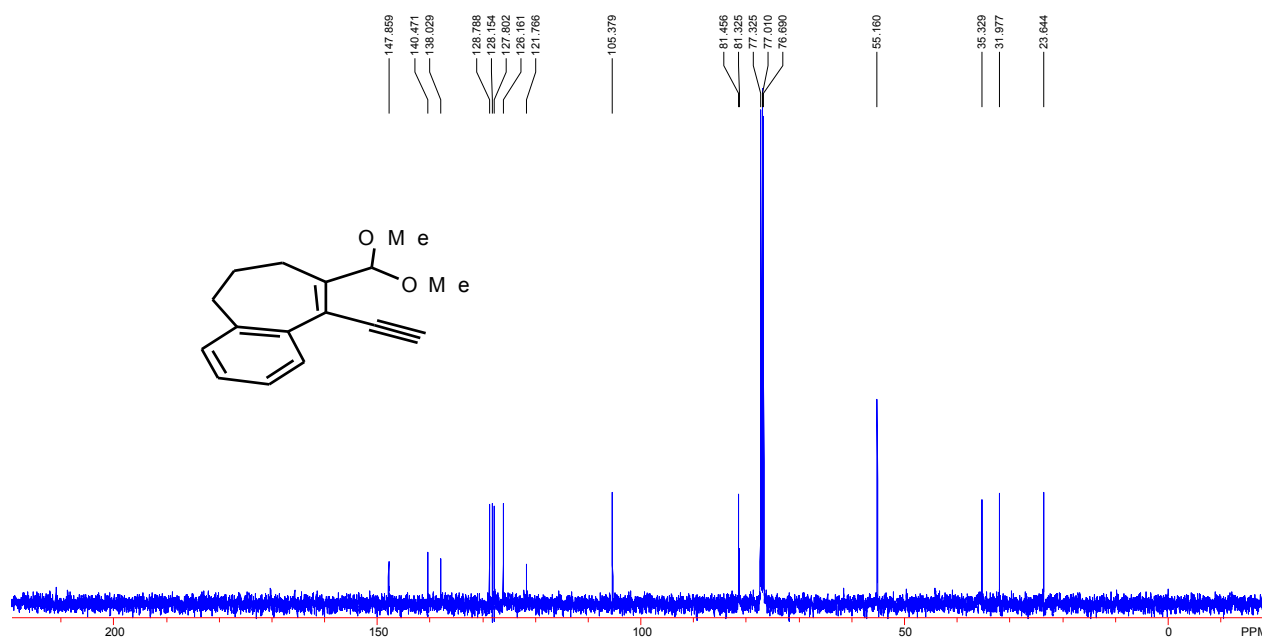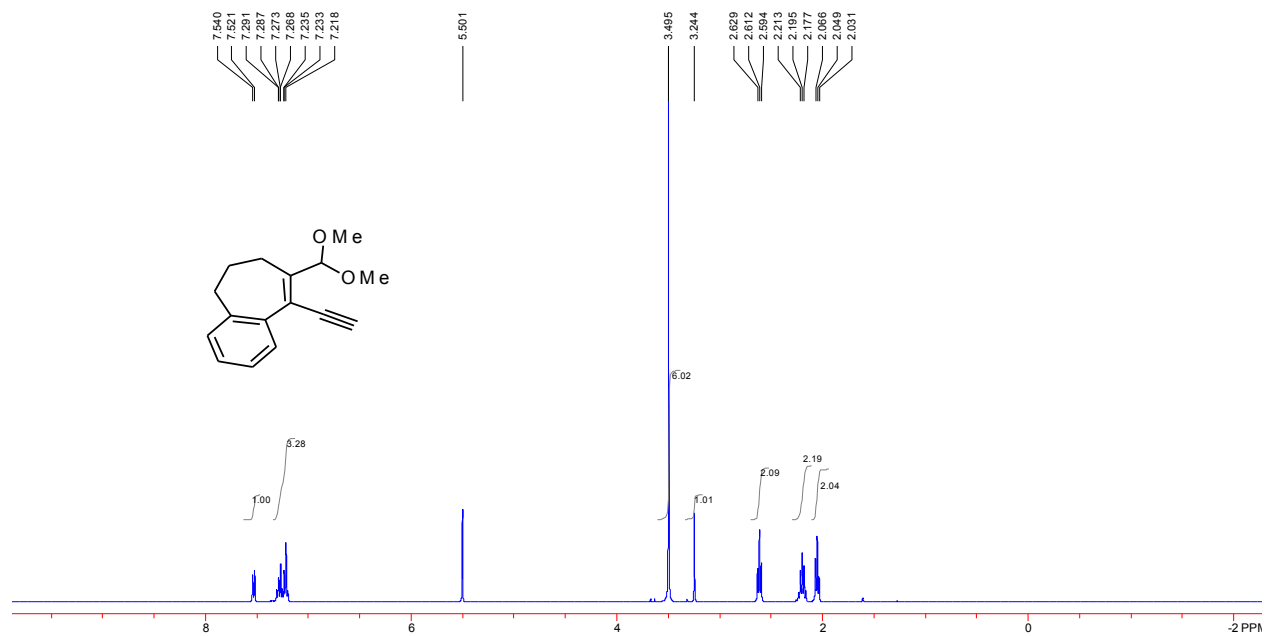

$^1\text{H}$  NMR (400 MHz,  $\text{CDCl}_3$ ) and  $^{13}\text{C}$  NMR (100 MHz,  $\text{CDCl}_3$ ) of **1o**

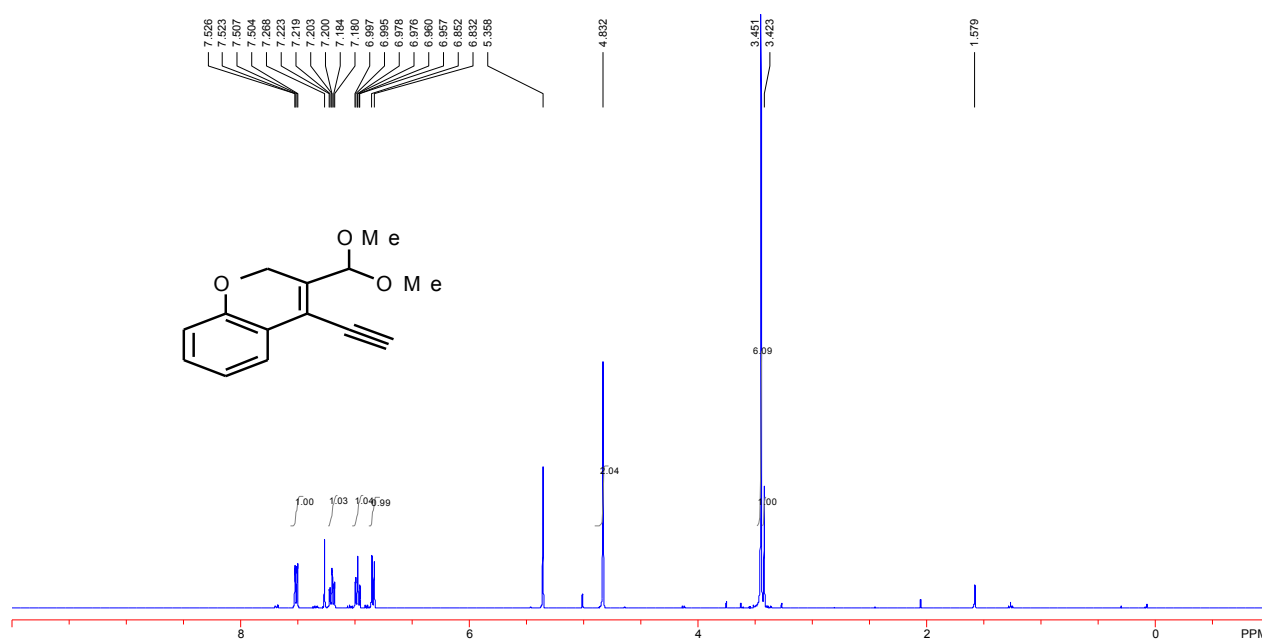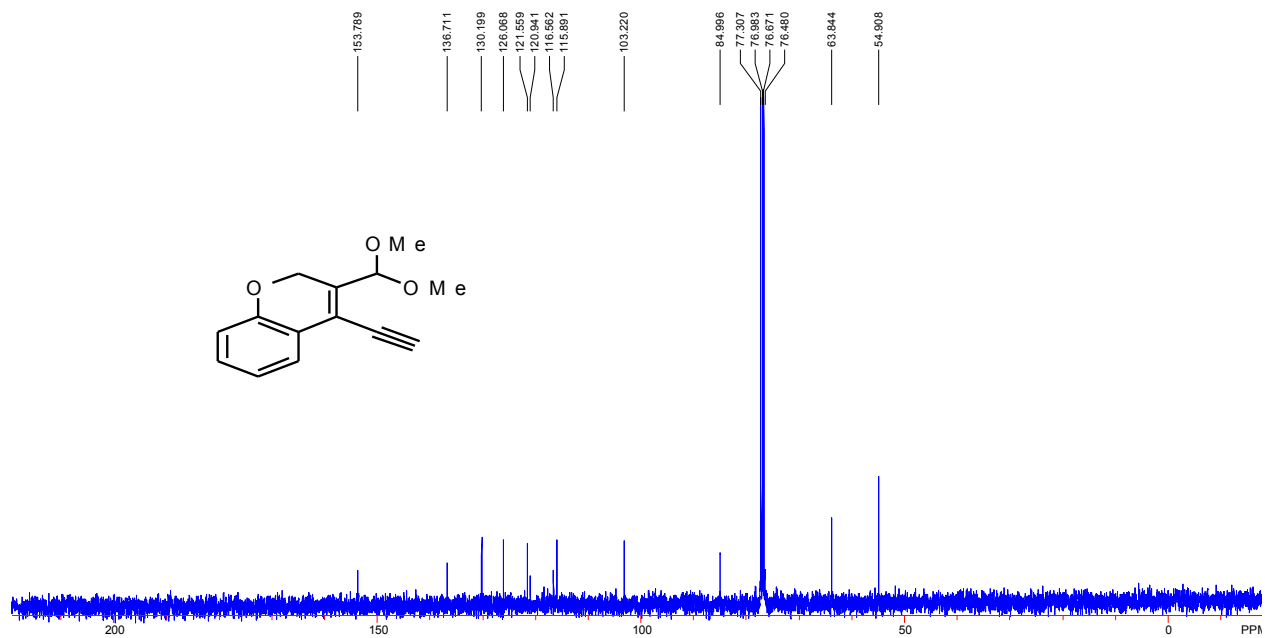

$^1\text{H}$  NMR (400 MHz,  $\text{CDCl}_3$ ) and  $^{13}\text{C}$  NMR (100 MHz,  $\text{CDCl}_3$ ) of **1p**

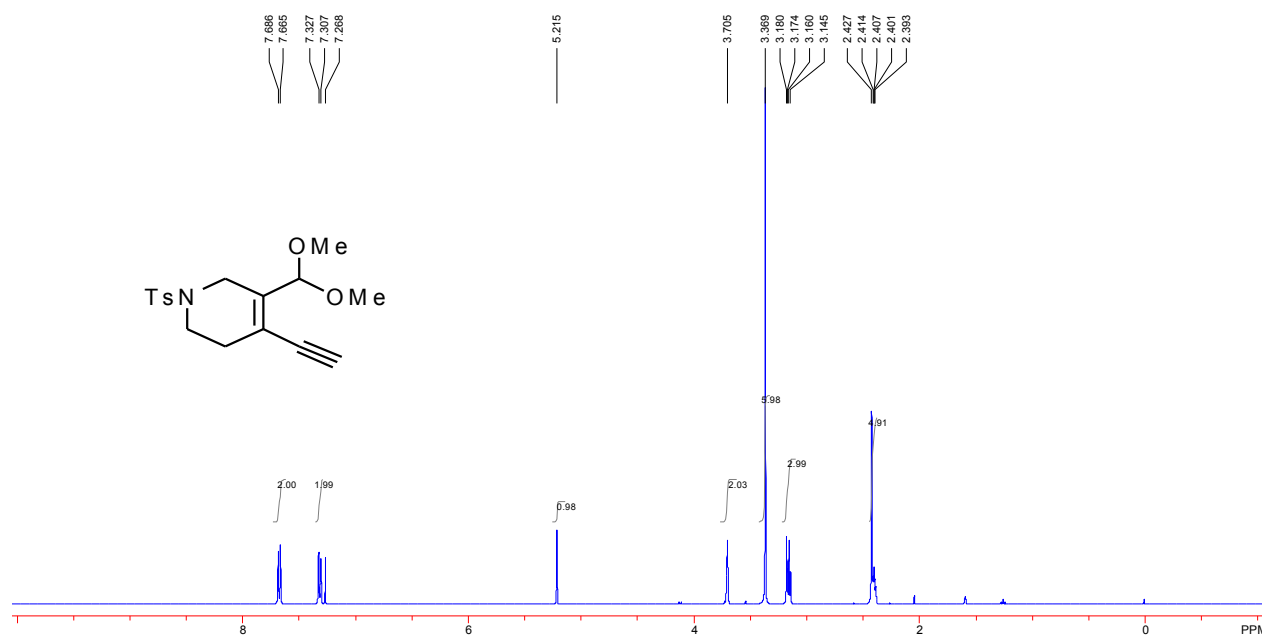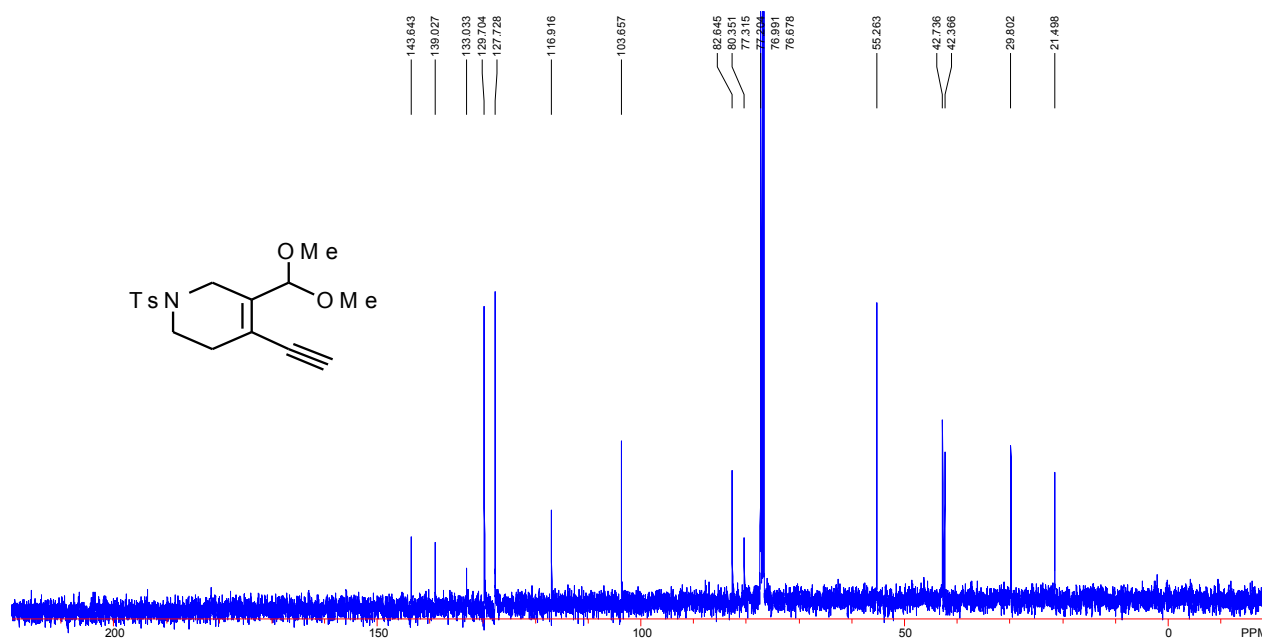

$^1\text{H}$  NMR (400 MHz,  $\text{CDCl}_3$ ) and  $^{13}\text{C}$  NMR (100 MHz,  $\text{CDCl}_3$ ) of **1q**

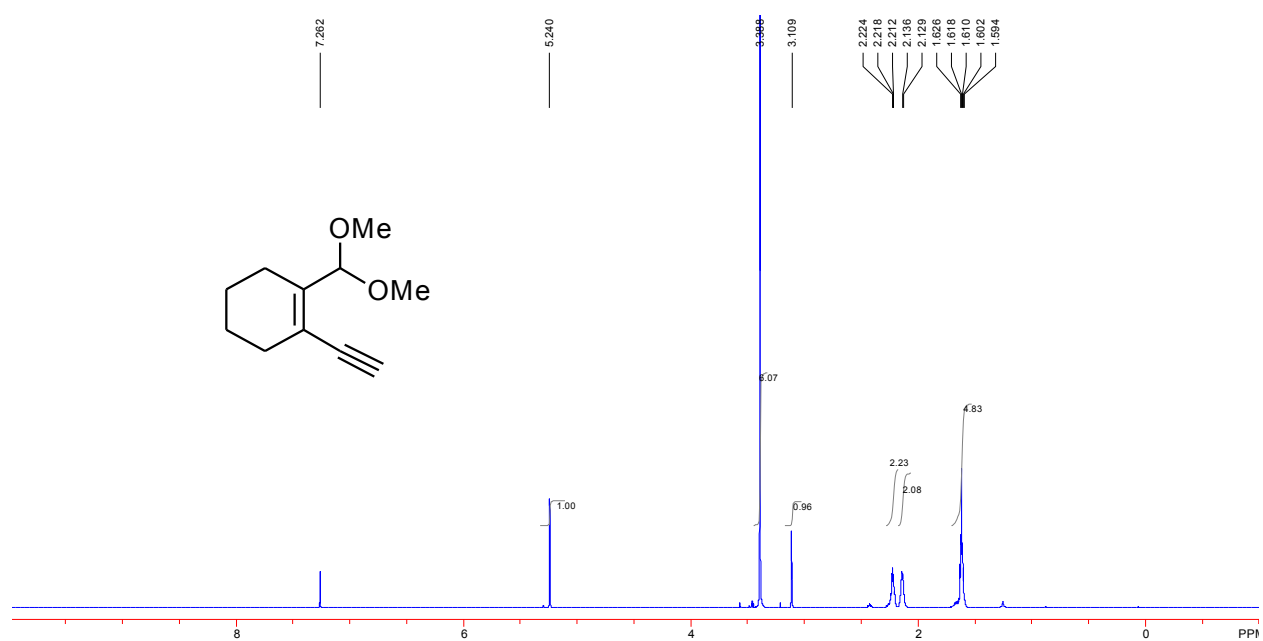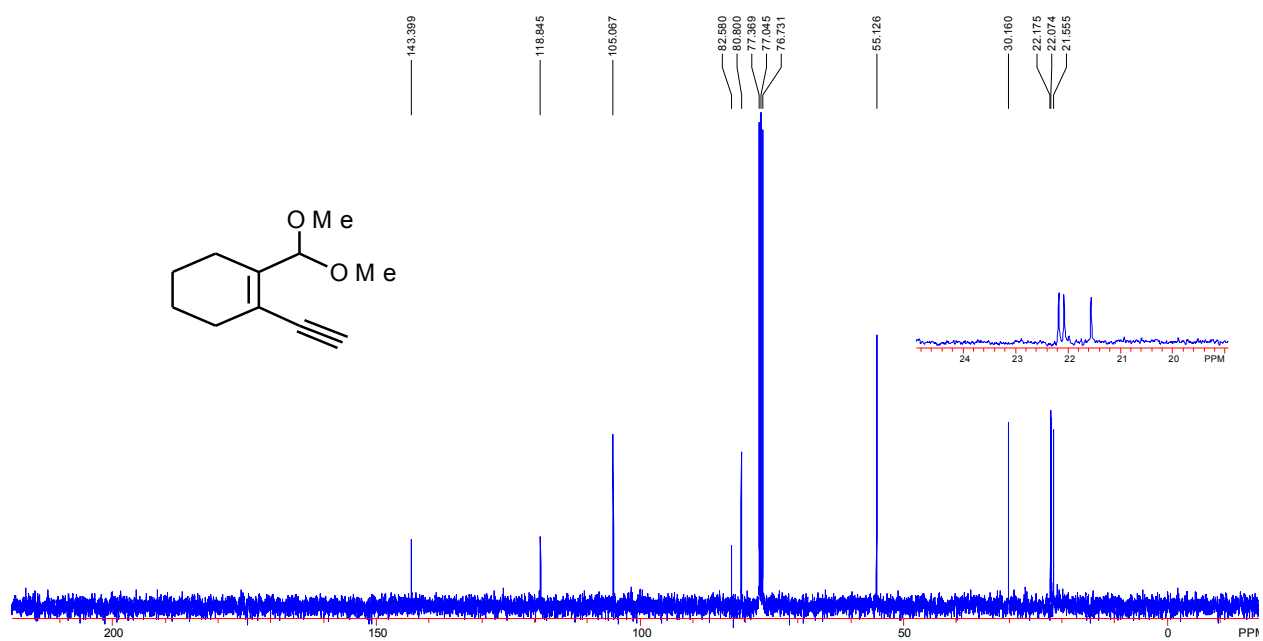

$^1\text{H}$  NMR (400 MHz,  $\text{CDCl}_3$ ) and  $^{13}\text{C}$  NMR (100 MHz,  $\text{CDCl}_3$ ) of **3a**

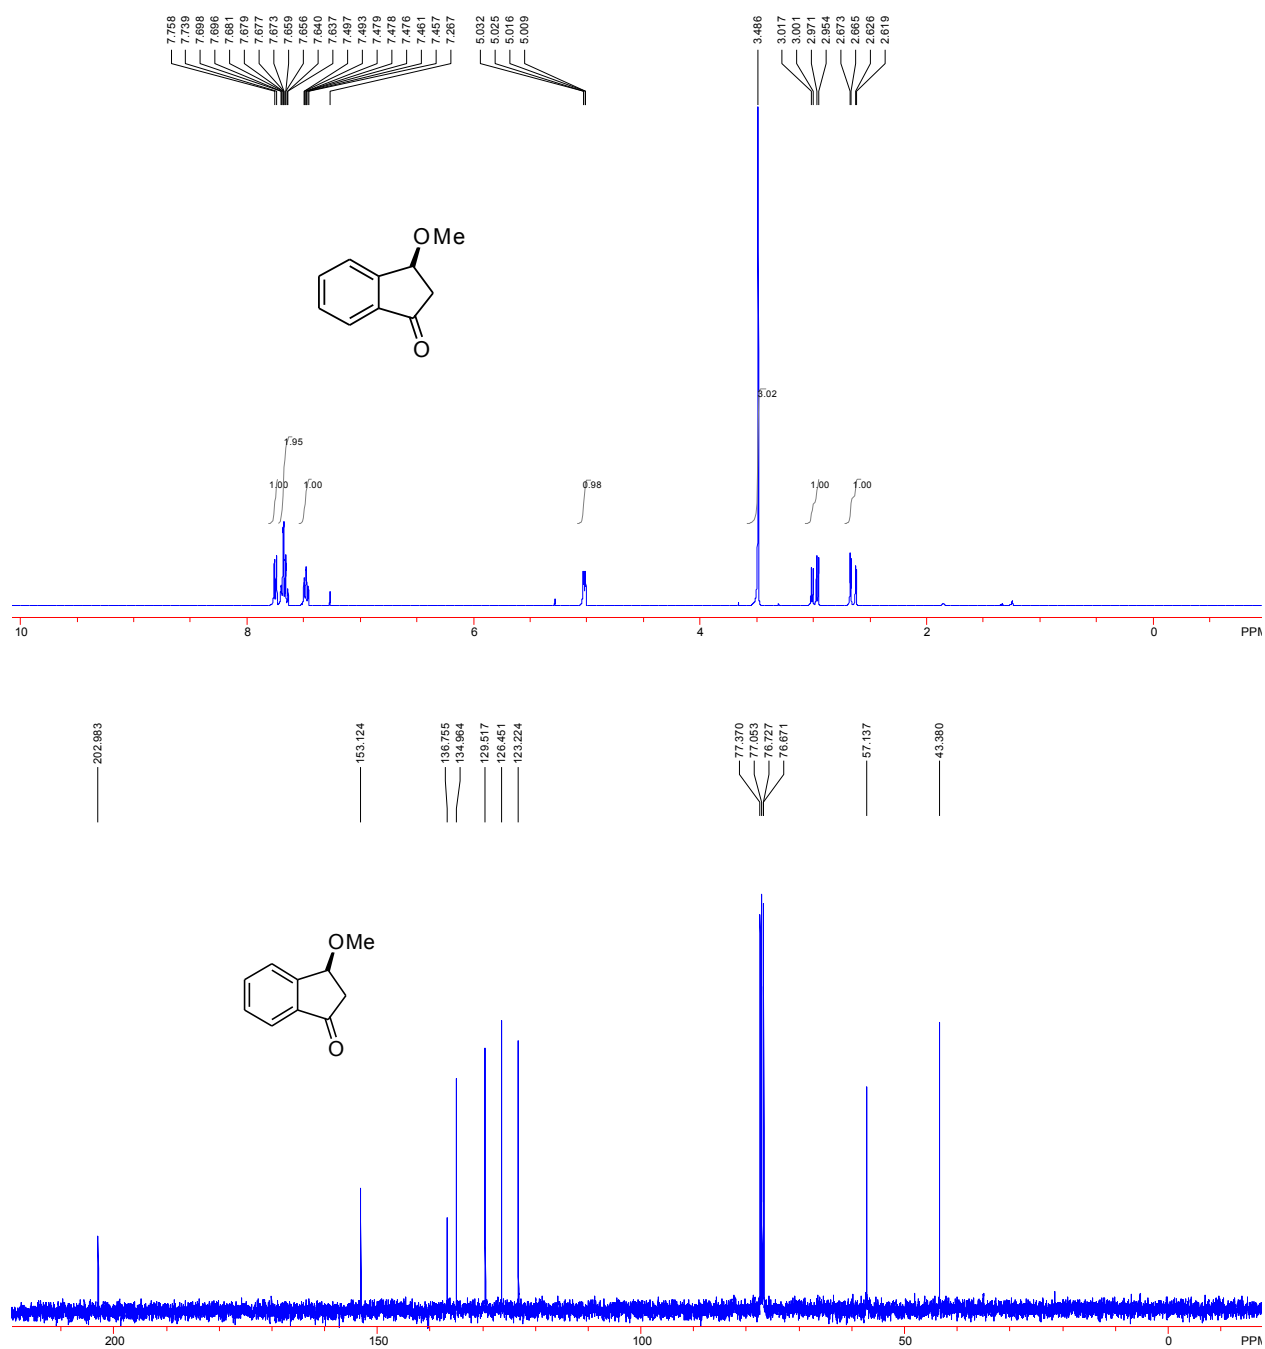

$^1\text{H}$  NMR (400 MHz,  $\text{CDCl}_3$ ) and  $^{13}\text{C}$  NMR (100 MHz,  $\text{CDCl}_3$ ) of **3b**

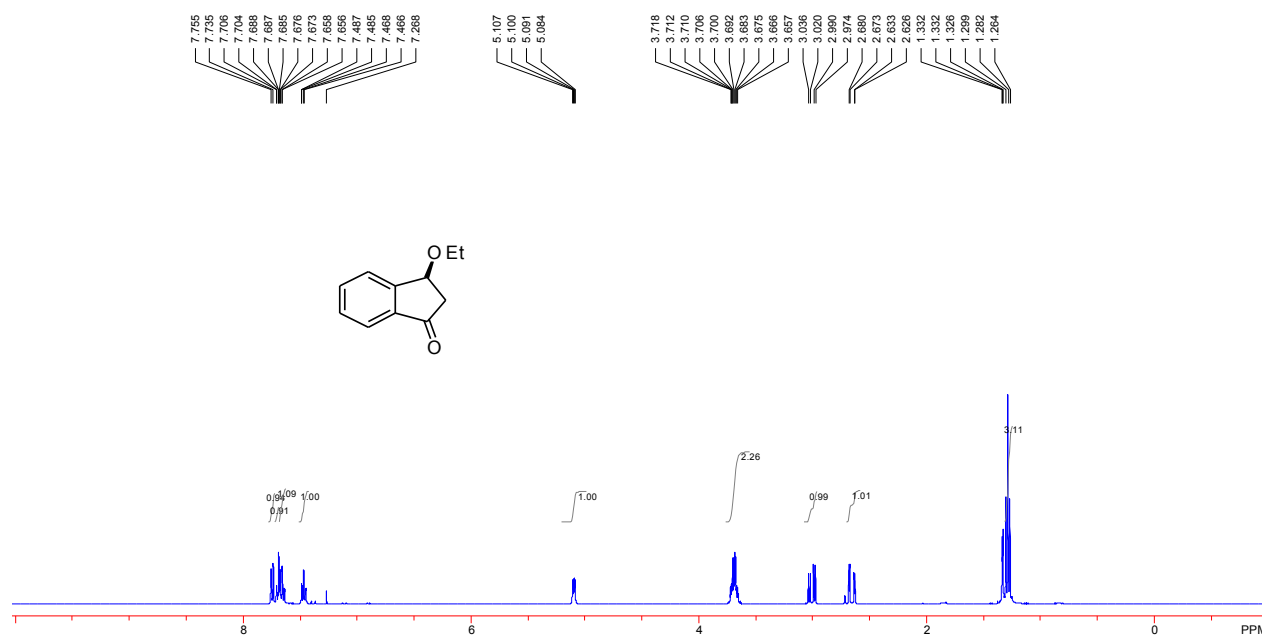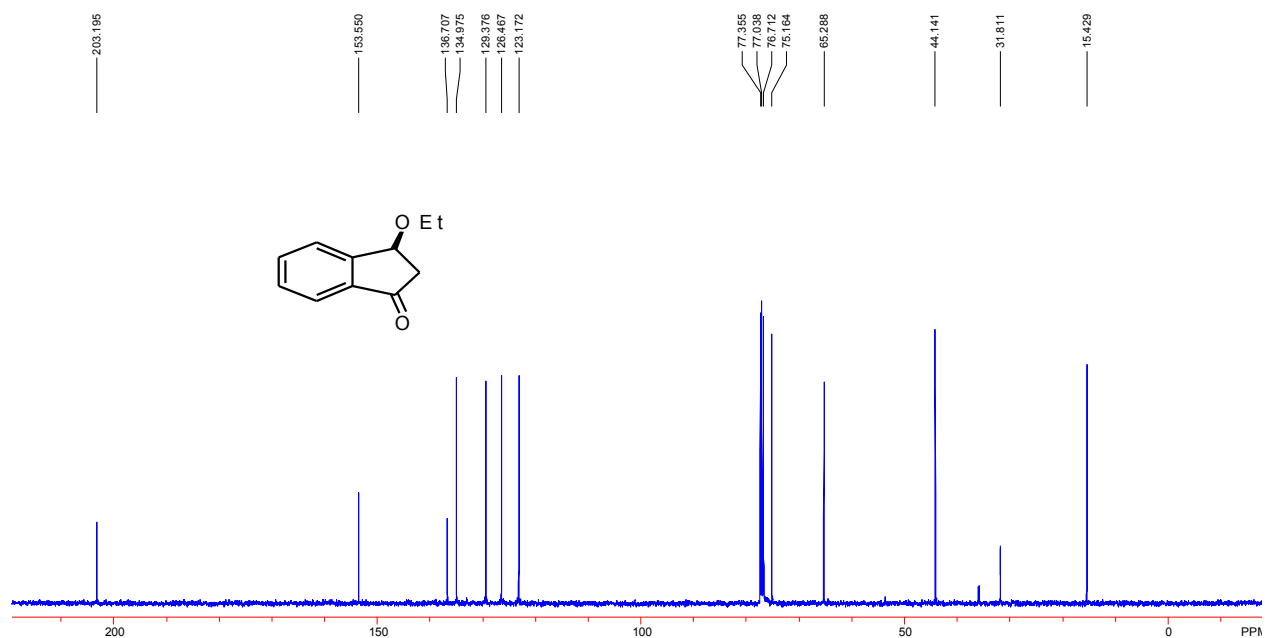



$^1\text{H}$  NMR (400 MHz,  $\text{CDCl}_3$ ) and  $^{13}\text{C}$  NMR (100 MHz,  $\text{CDCl}_3$ ) of **3c**

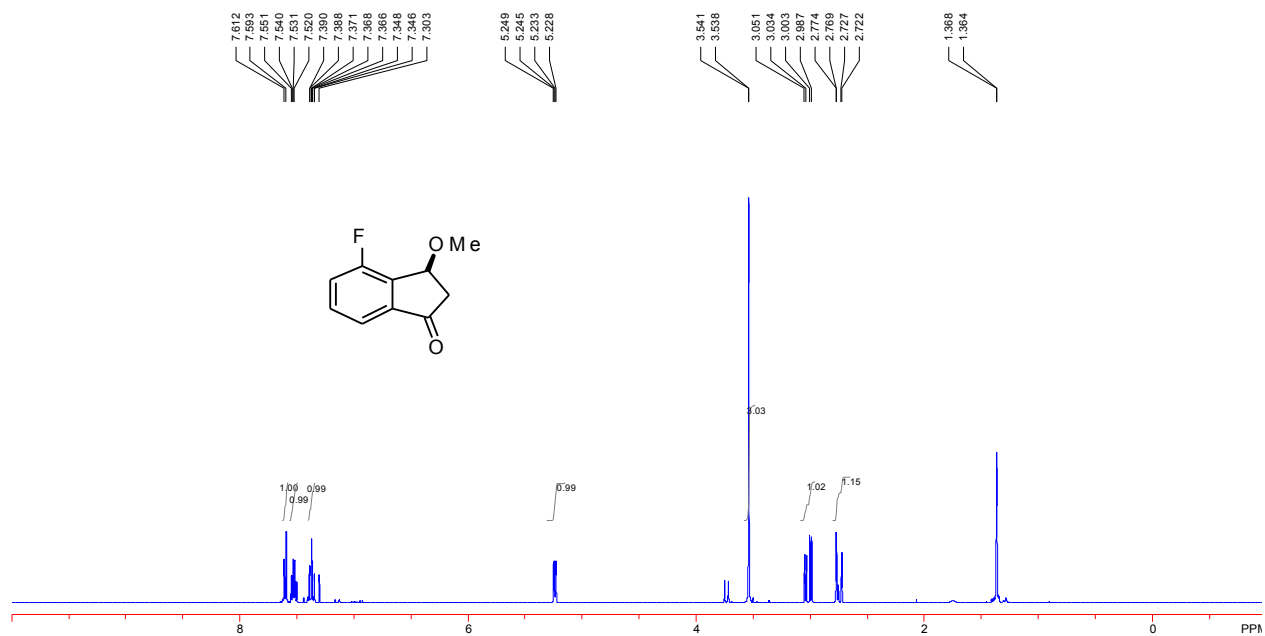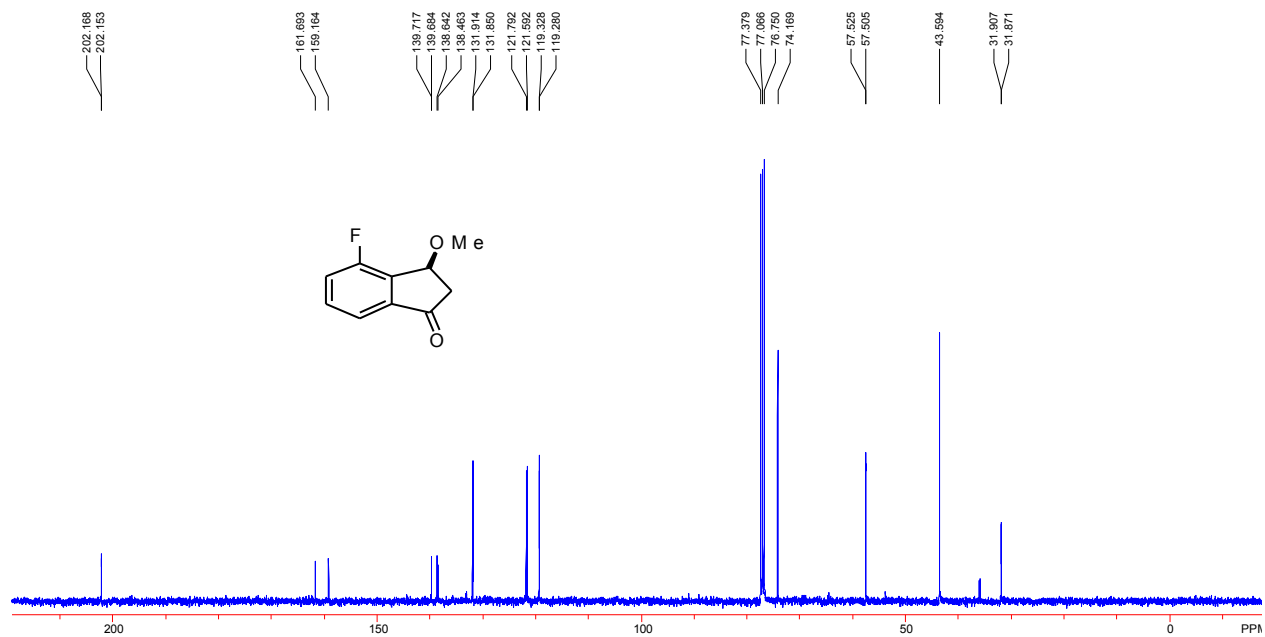

$^1\text{H}$  NMR (400 MHz,  $\text{CDCl}_3$ ) and  $^{13}\text{C}$  NMR (100 MHz,  $\text{CDCl}_3$ ) of **3d**

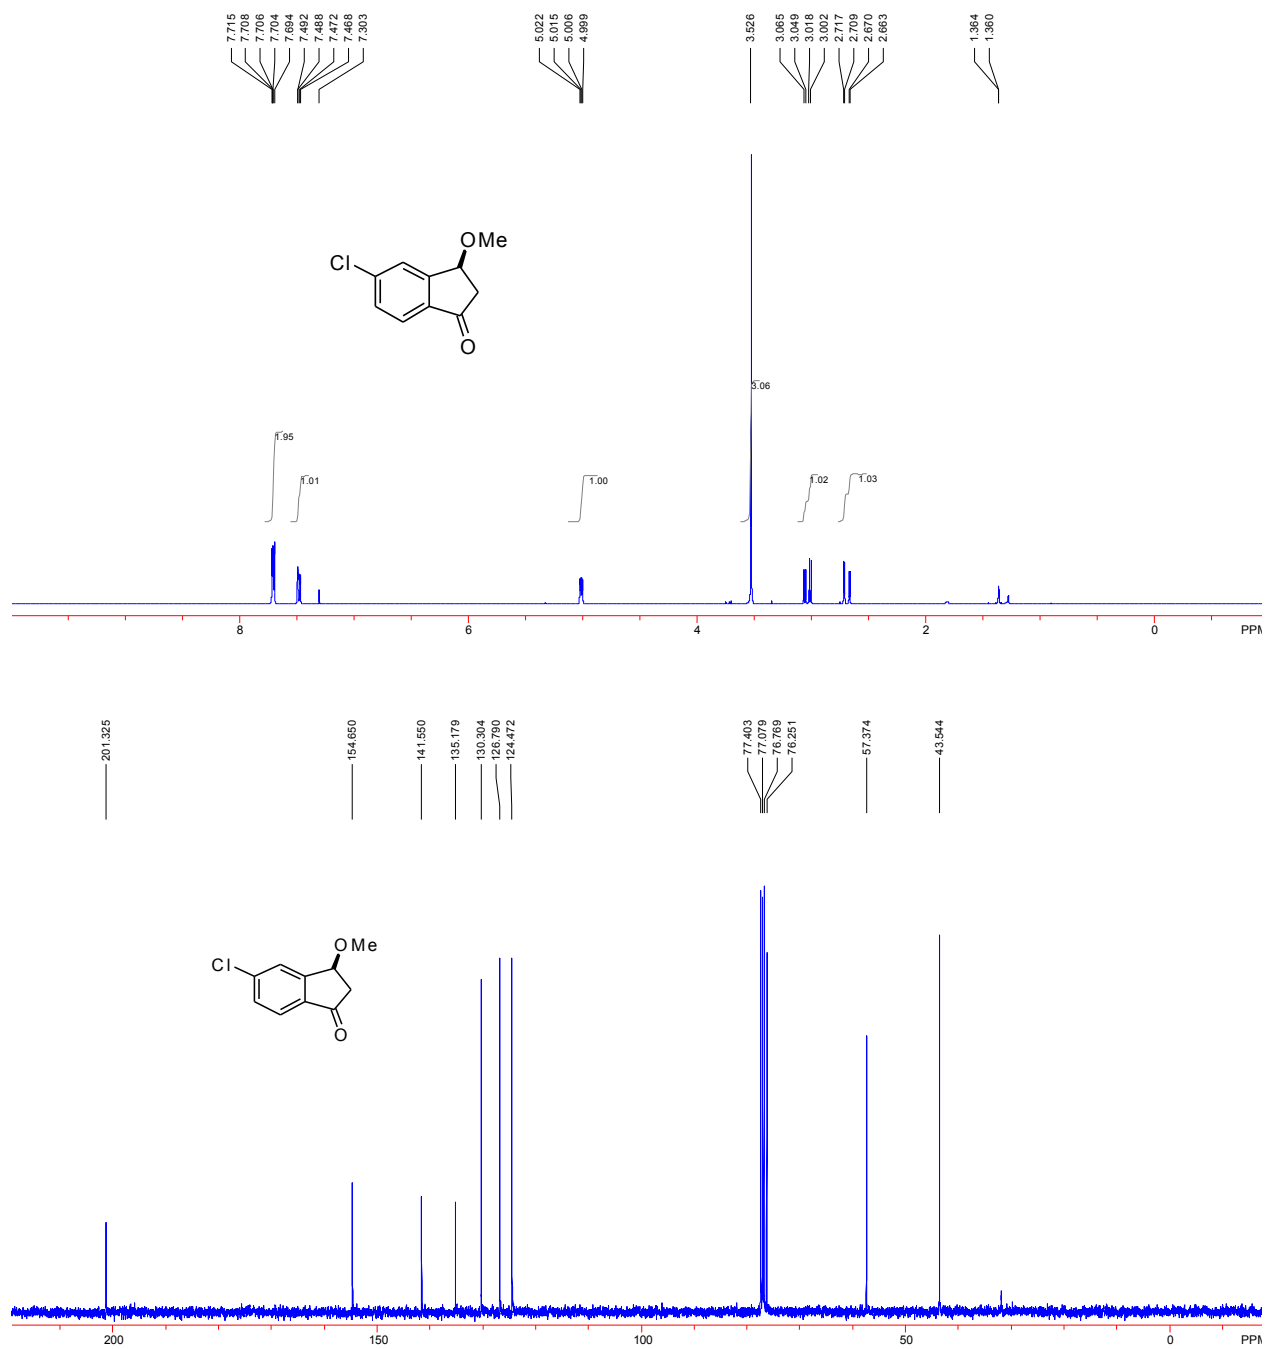

$^1\text{H}$  NMR (400 MHz,  $\text{CDCl}_3$ ) and  $^{13}\text{C}$  NMR (100 MHz,  $\text{CDCl}_3$ ) of **3e**

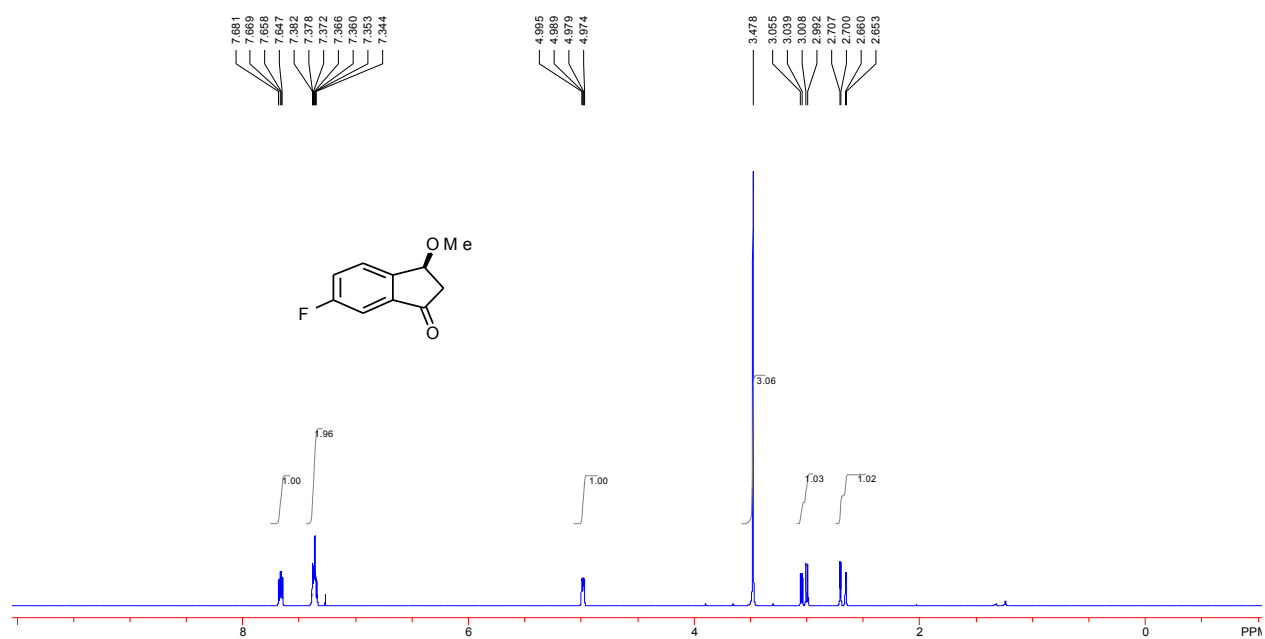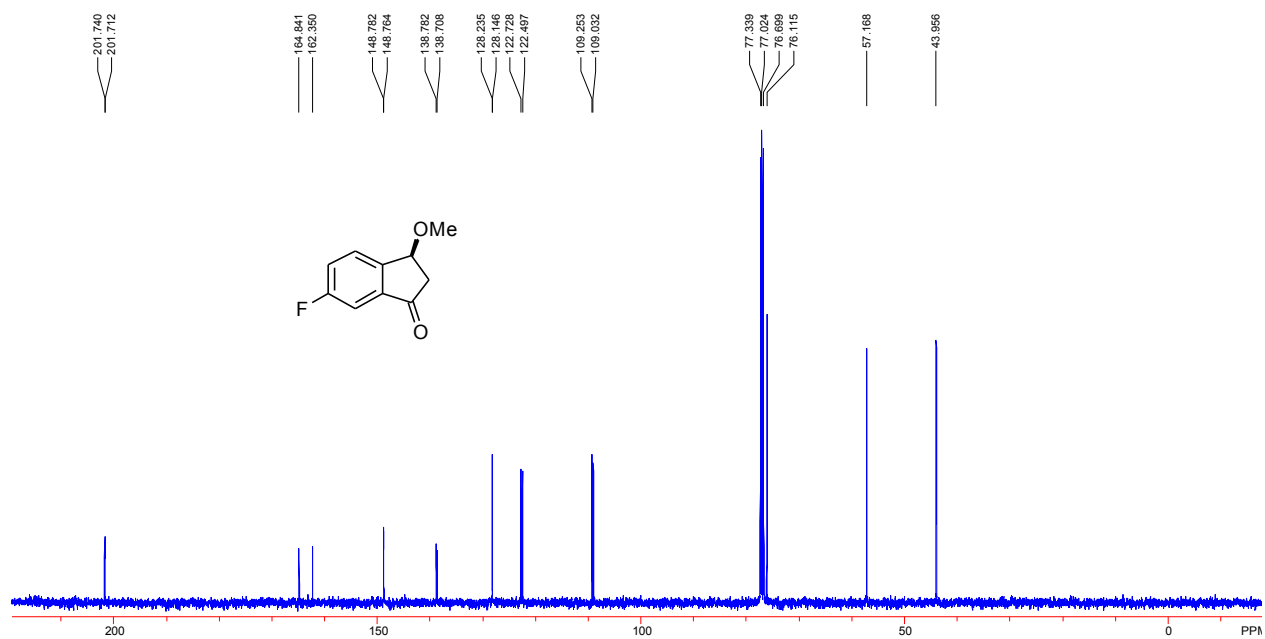

$^1\text{H}$  NMR (400 MHz,  $\text{CDCl}_3$ ) and  $^{13}\text{C}$  NMR (100 MHz,  $\text{CDCl}_3$ ) of **3f**

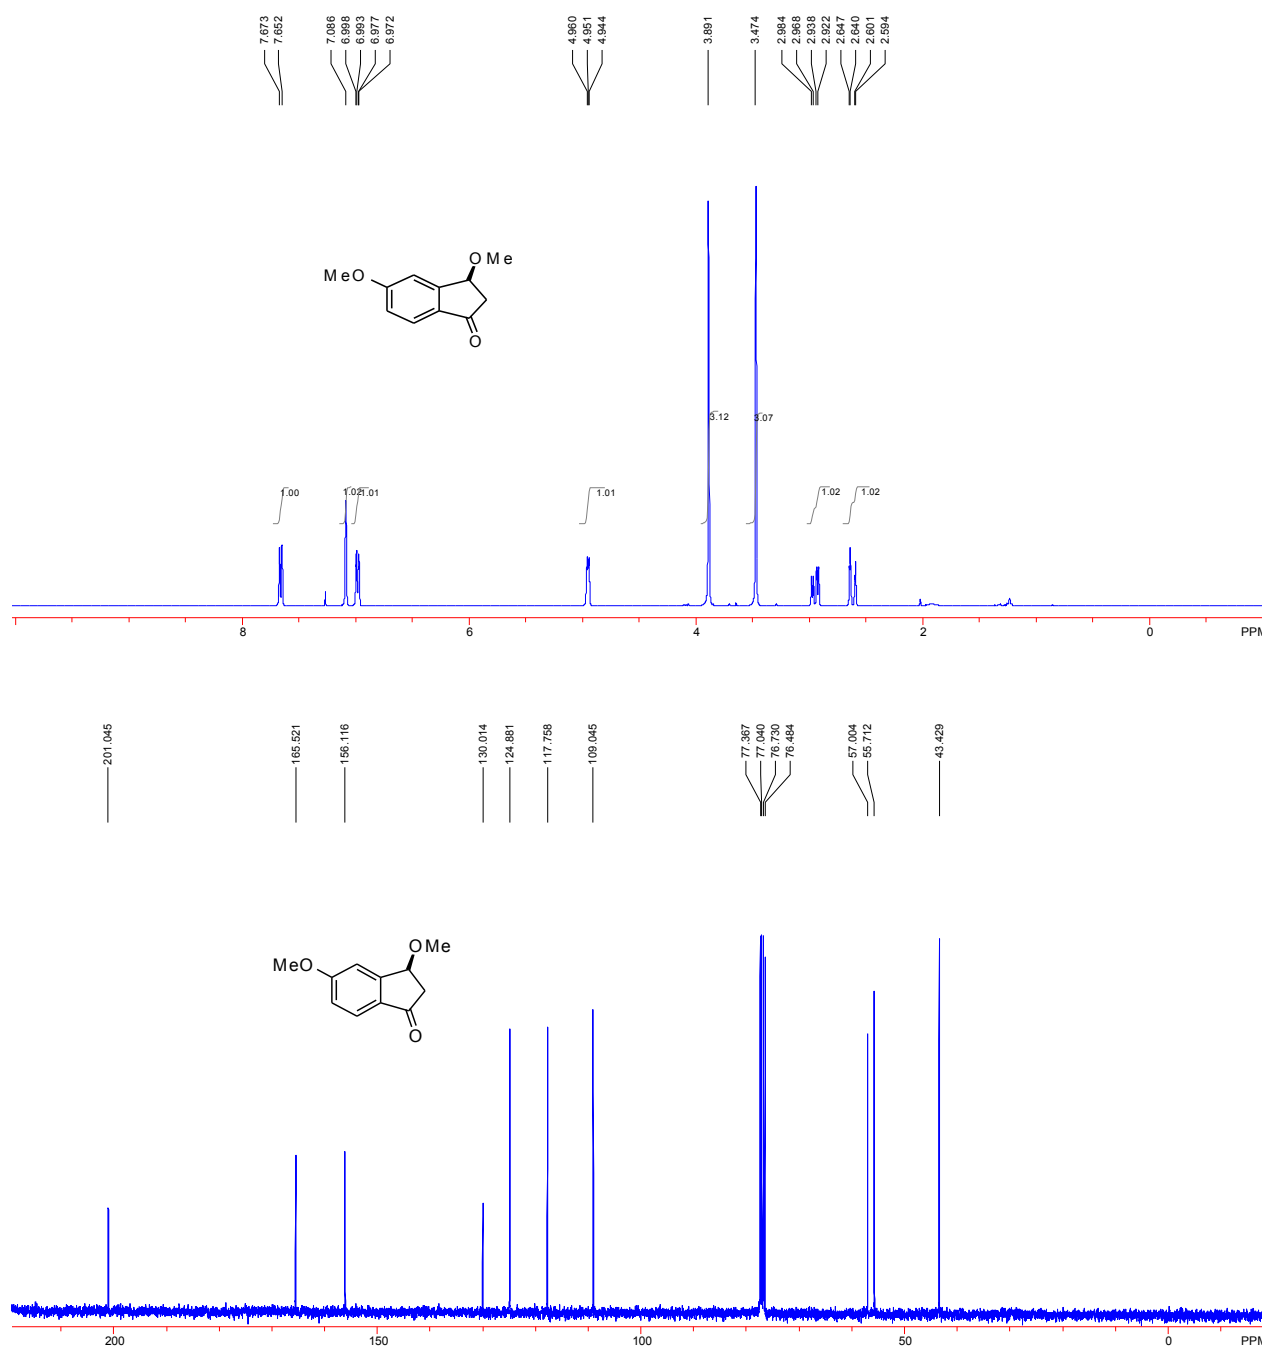

$^1\text{H}$  NMR (400 MHz,  $\text{CDCl}_3$ ) and  $^{13}\text{C}$  NMR (100 MHz,  $\text{CDCl}_3$ ) of **3g**

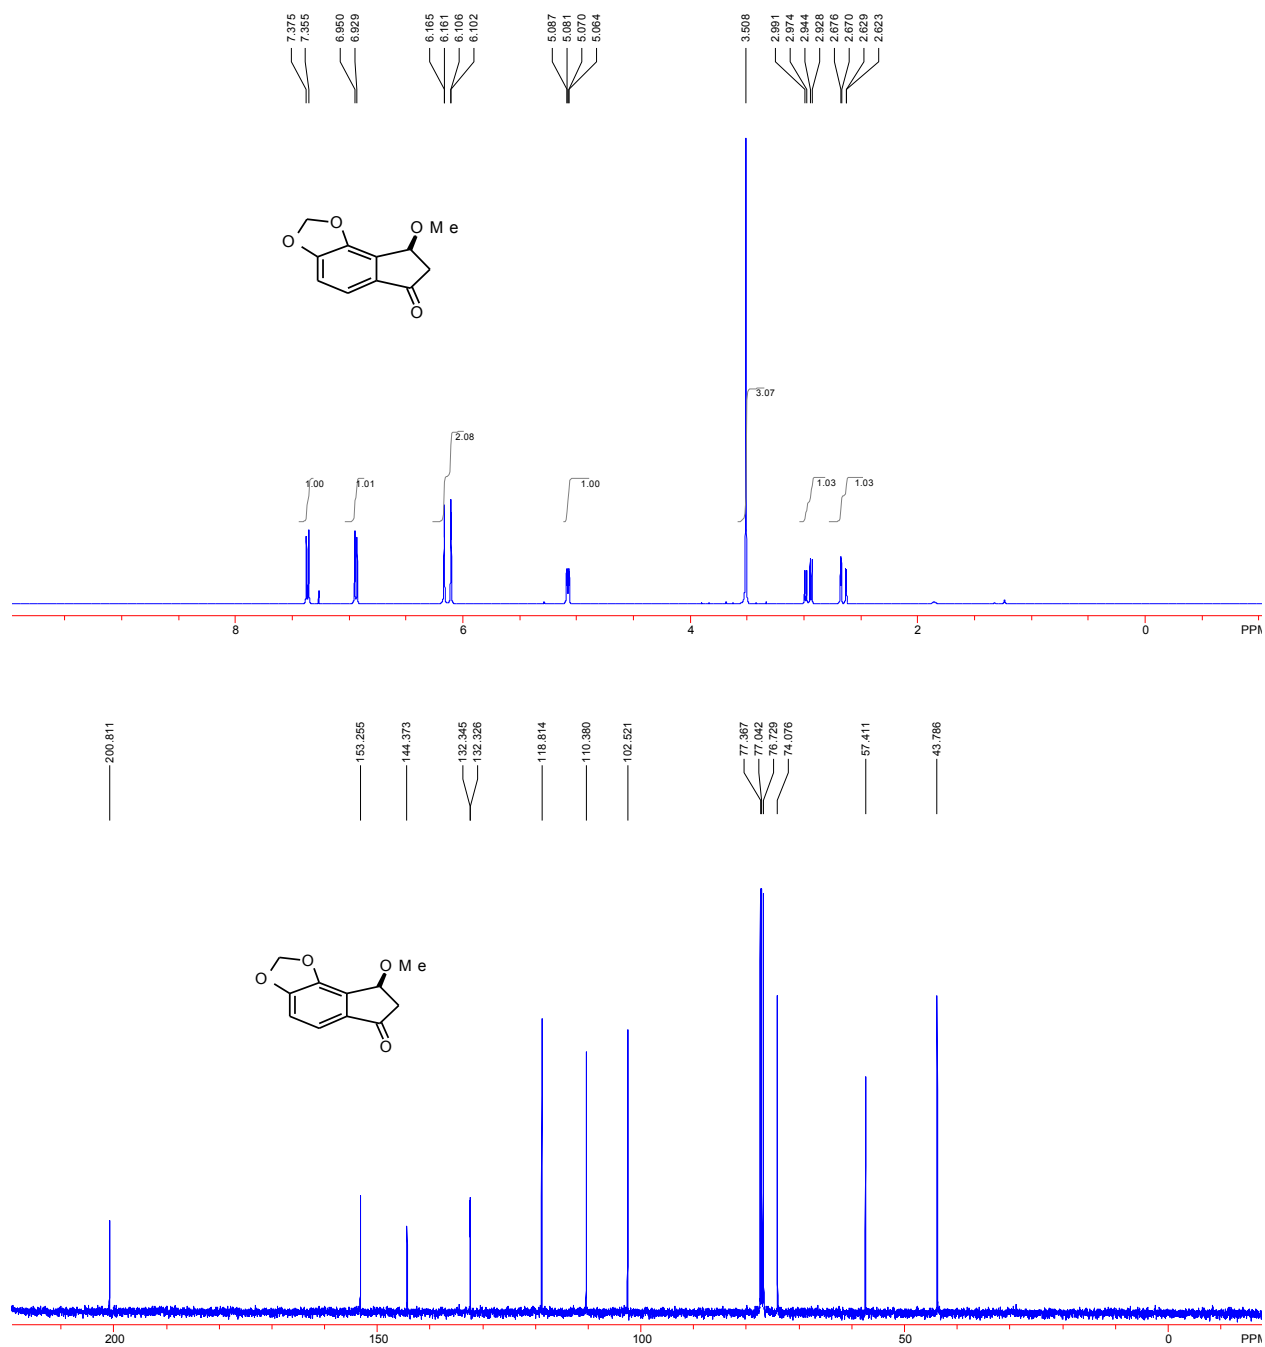

$^1\text{H}$  NMR (400 MHz,  $\text{CDCl}_3$ ) and  $^{13}\text{C}$  NMR (100 MHz,  $\text{CDCl}_3$ ) of **3h**

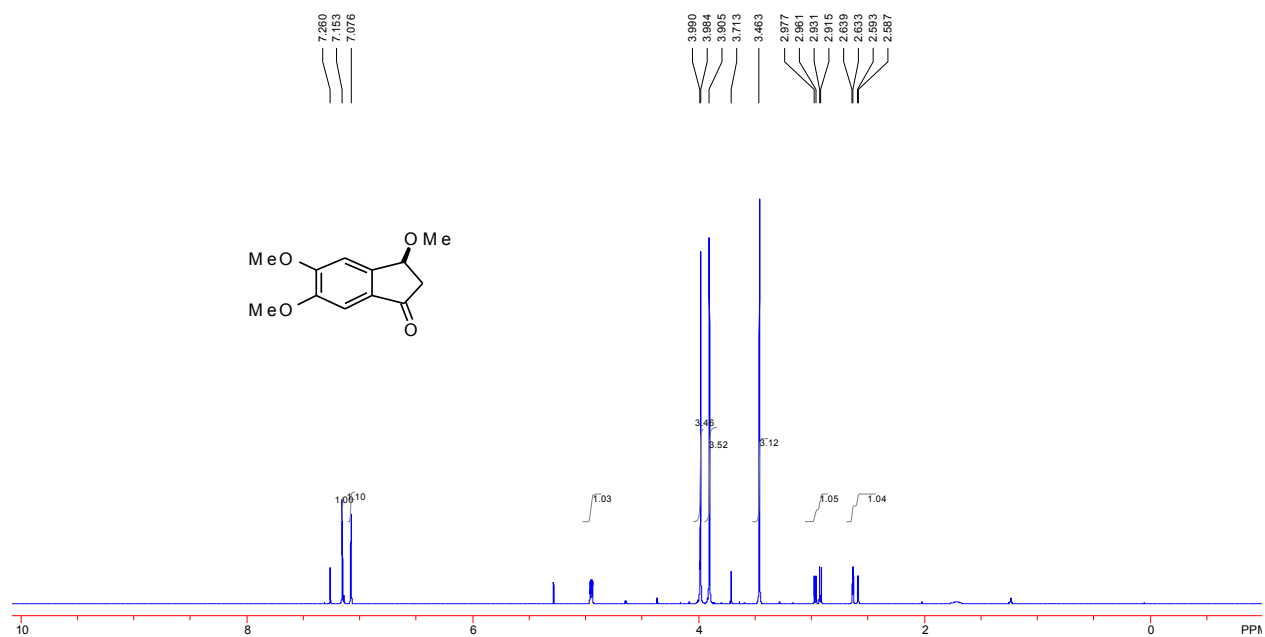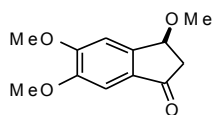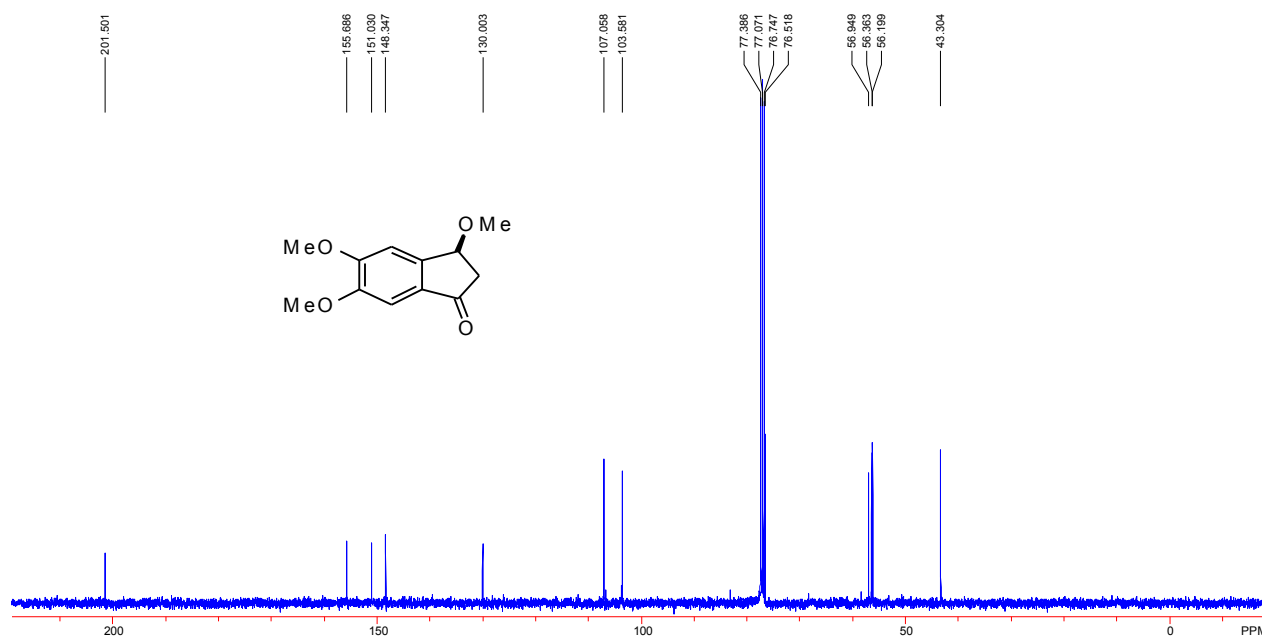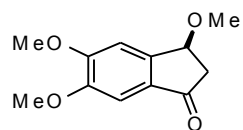

$^1\text{H}$  NMR (400 MHz,  $\text{CDCl}_3$ ) and  $^{13}\text{C}$  NMR (100 MHz,  $\text{CDCl}_3$ ) of **3i**

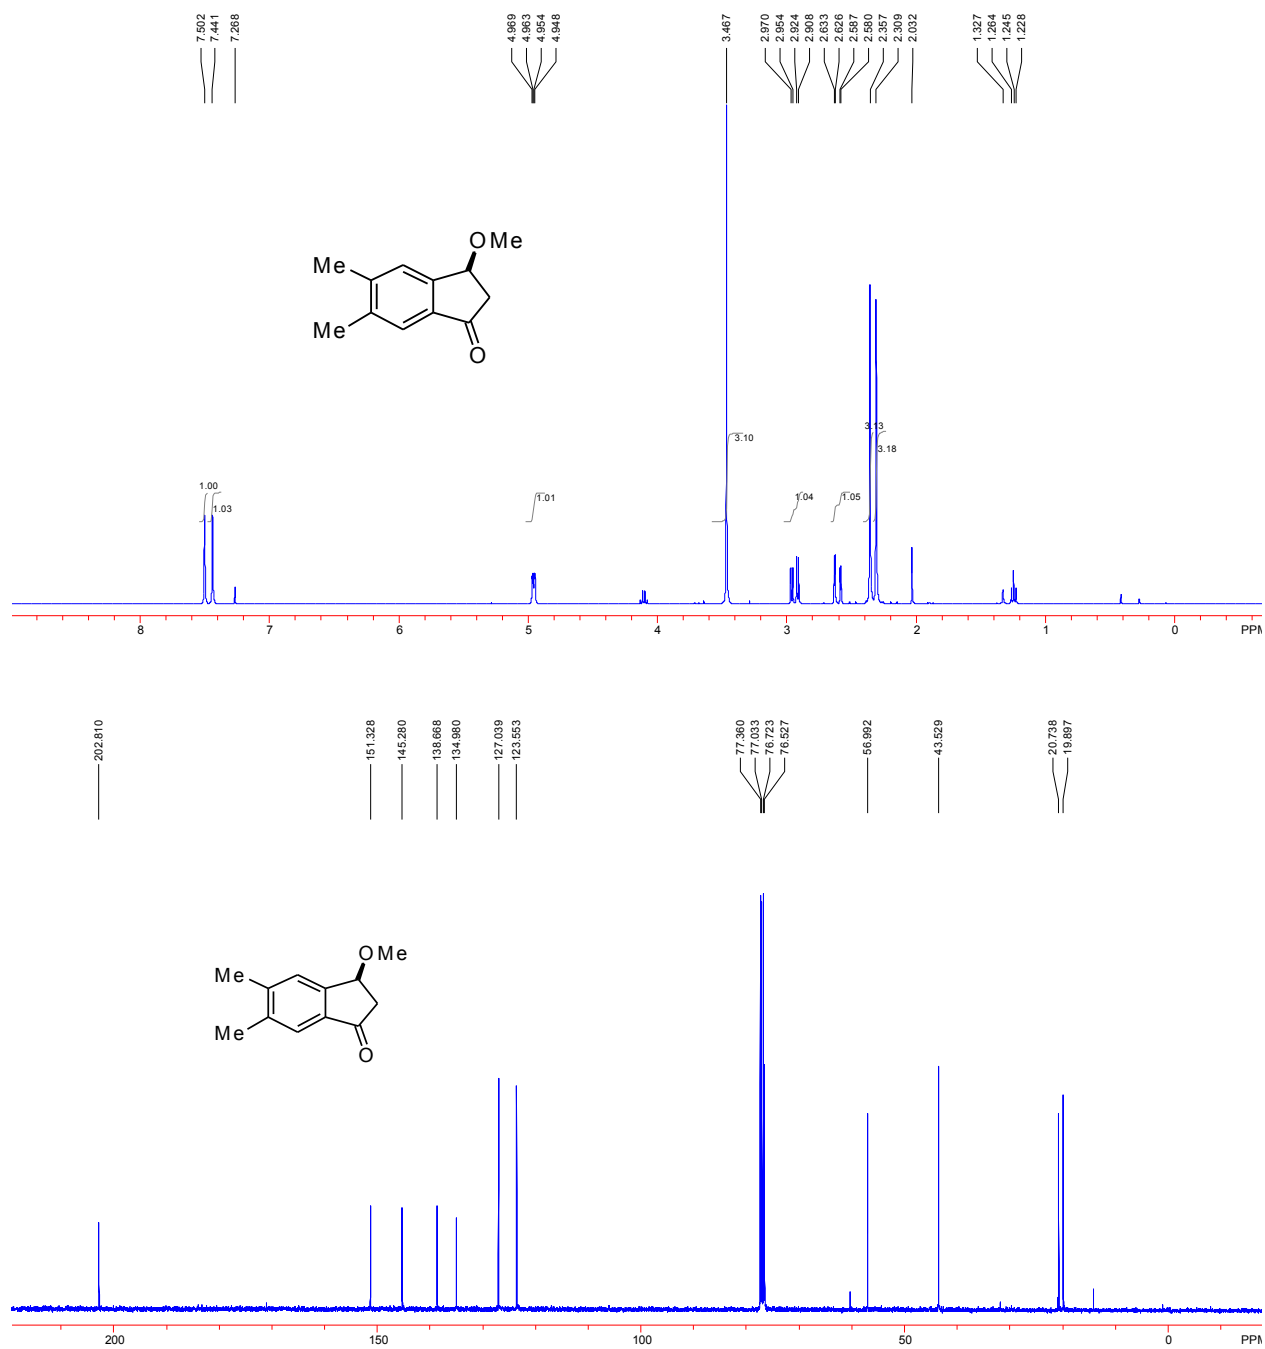

$^1\text{H}$  NMR (400 MHz,  $\text{CDCl}_3$ ) and  $^{13}\text{C}$  NMR (100 MHz,  $\text{CDCl}_3$ ) of **3j**

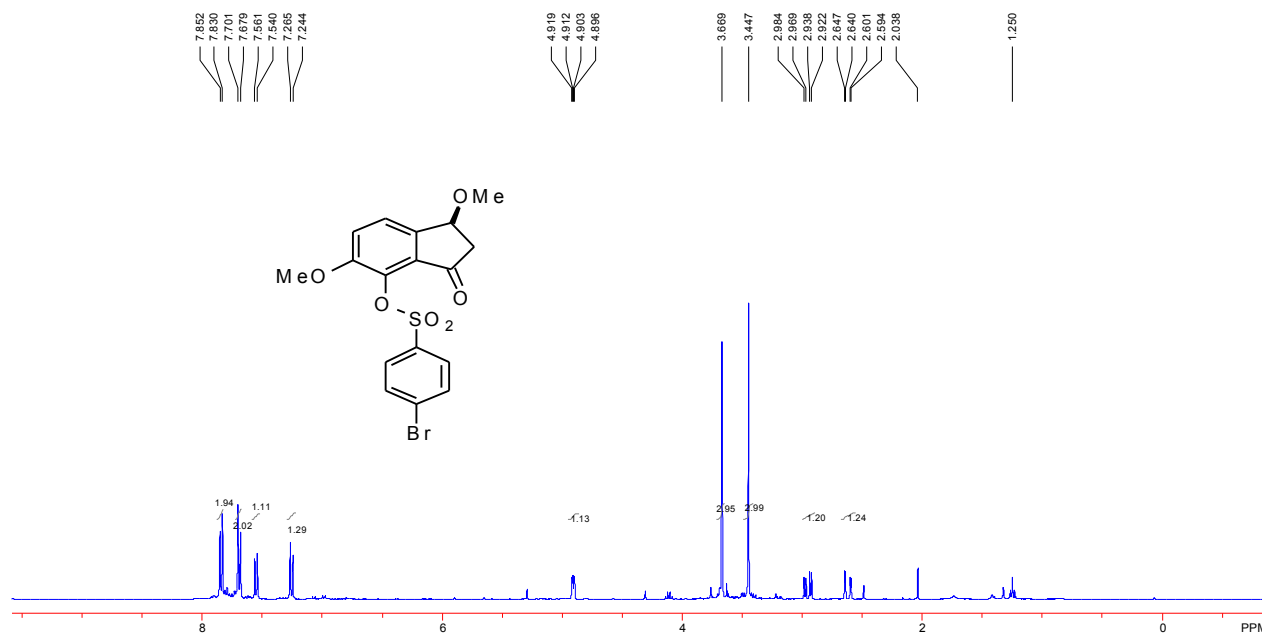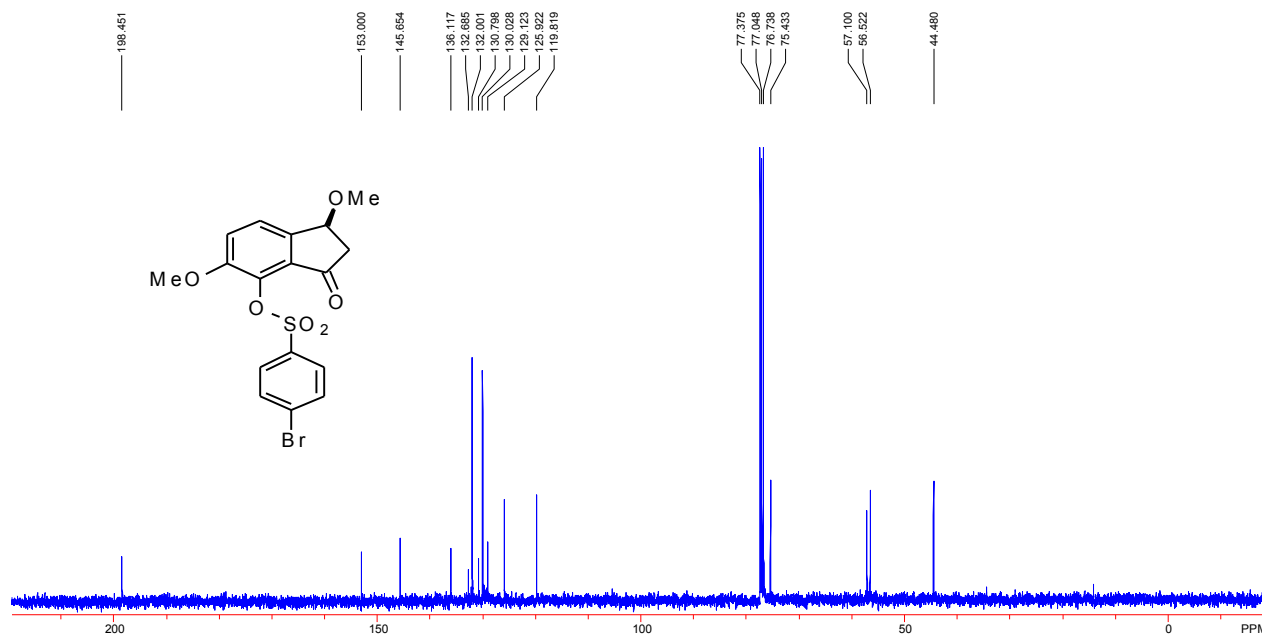



$^1\text{H}$  NMR (400 MHz,  $\text{CDCl}_3$ ) and  $^{13}\text{C}$  NMR (100 MHz,  $\text{CDCl}_3$ ) of **3k**

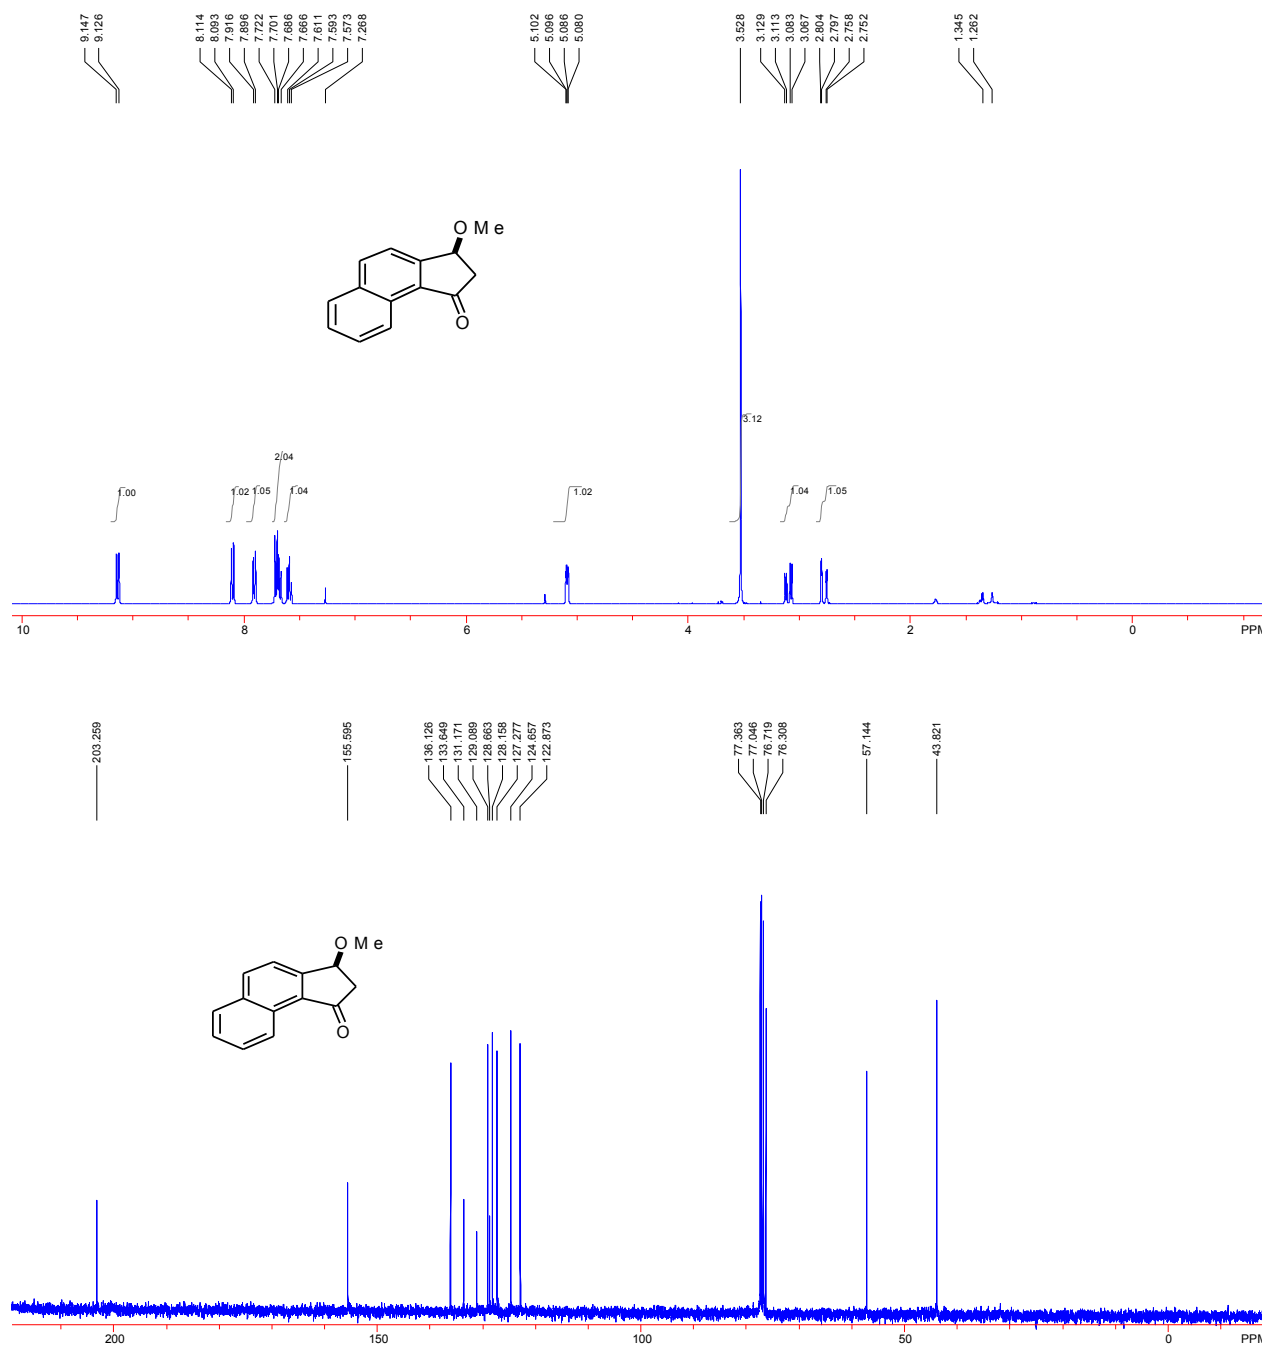

$^1\text{H}$  NMR (400 MHz,  $\text{CDCl}_3$ ) and  $^{13}\text{C}$  NMR (100 MHz,  $\text{CDCl}_3$ ) of **31**

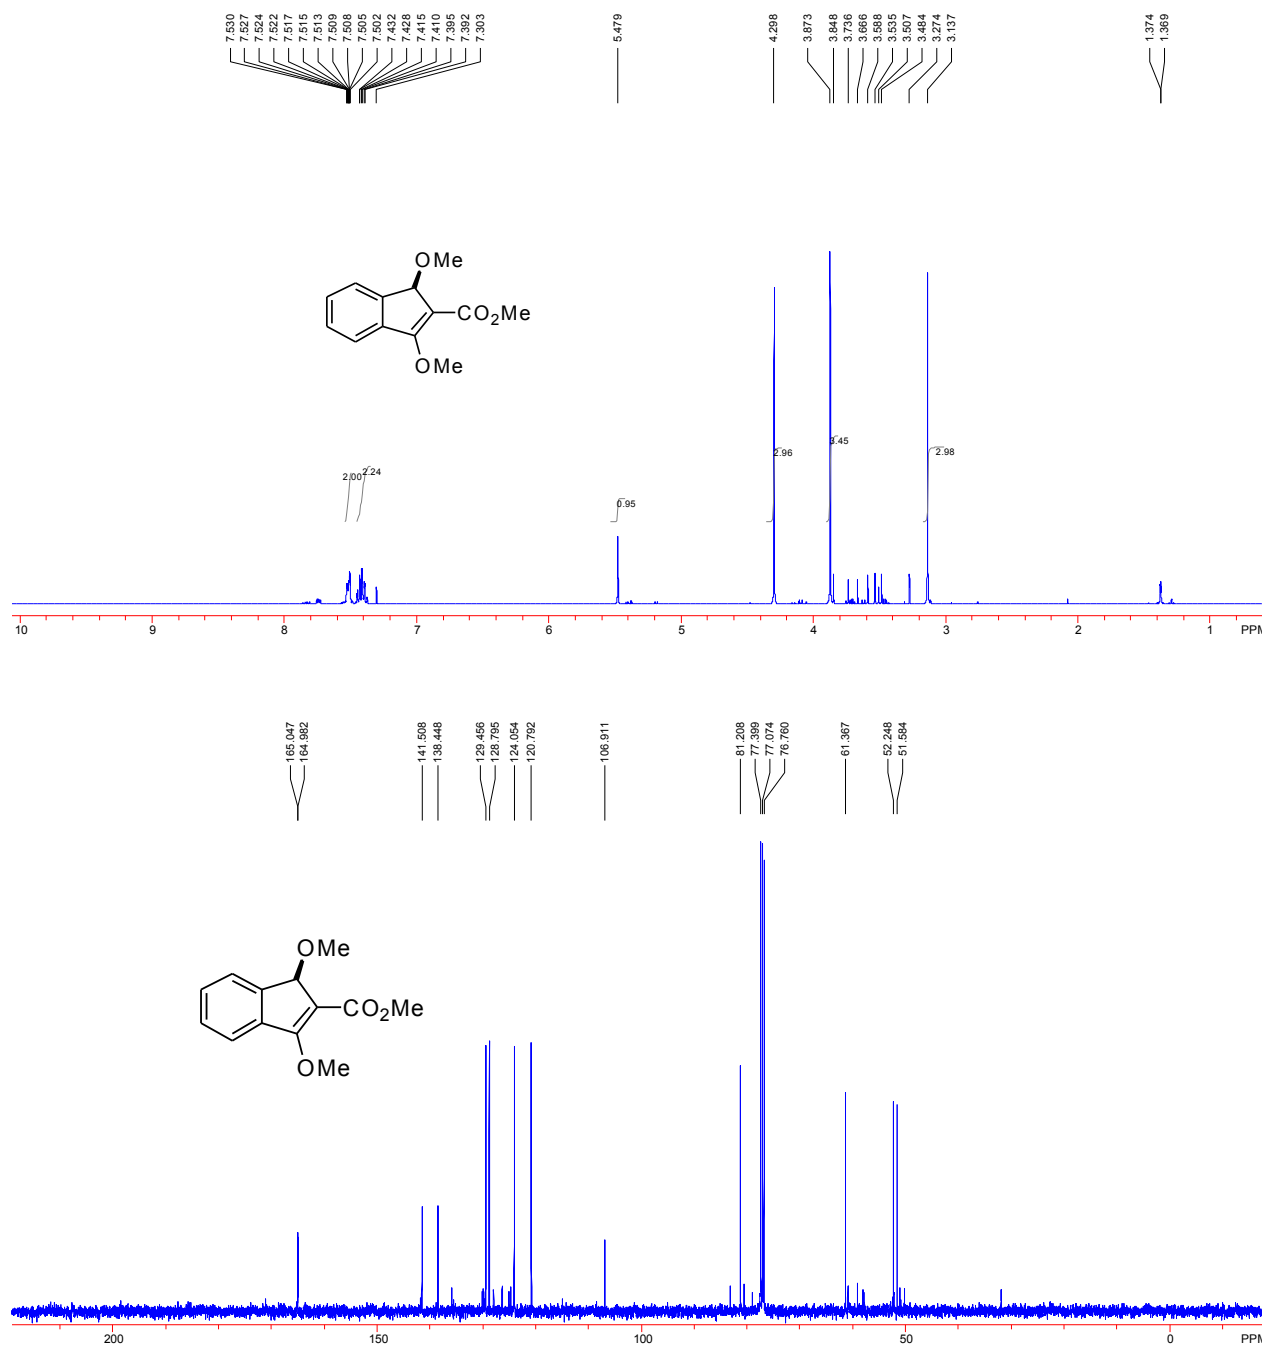

$^1\text{H}$  NMR (400 MHz,  $\text{CDCl}_3$ ) and  $^{13}\text{C}$  NMR (100 MHz,  $\text{CDCl}_3$ ) of **3m**

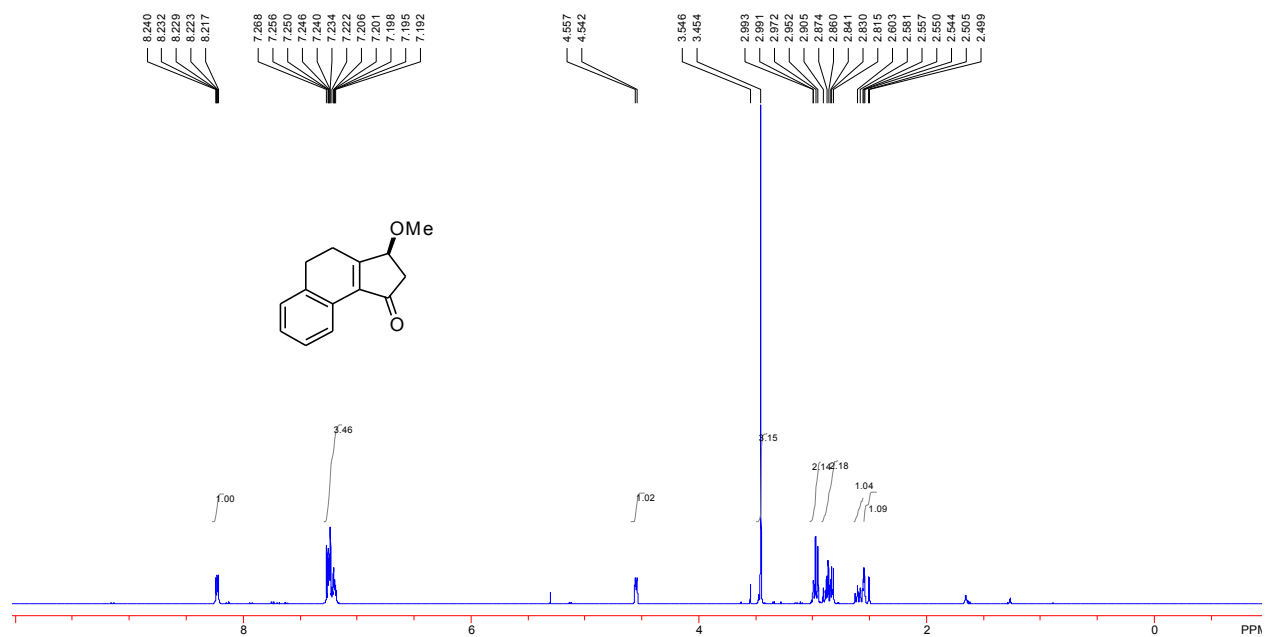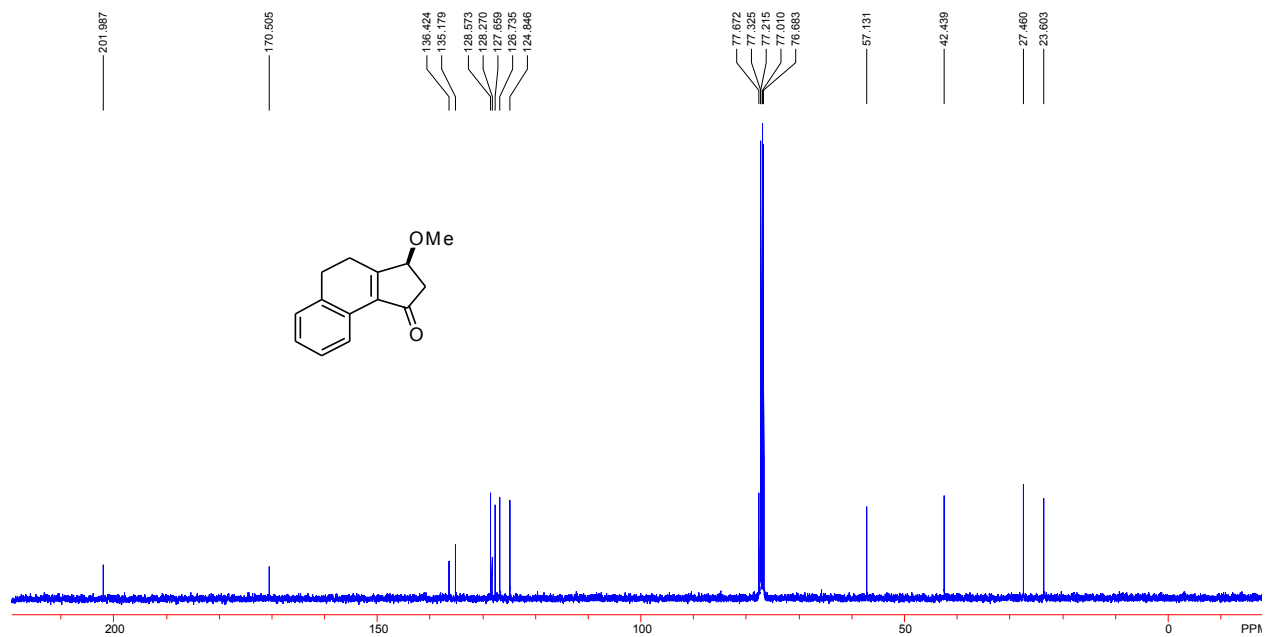

$^1\text{H}$  NMR (400 MHz,  $\text{CDCl}_3$ ) and  $^{13}\text{C}$  NMR (100 MHz,  $\text{CDCl}_3$ ) of **3n**

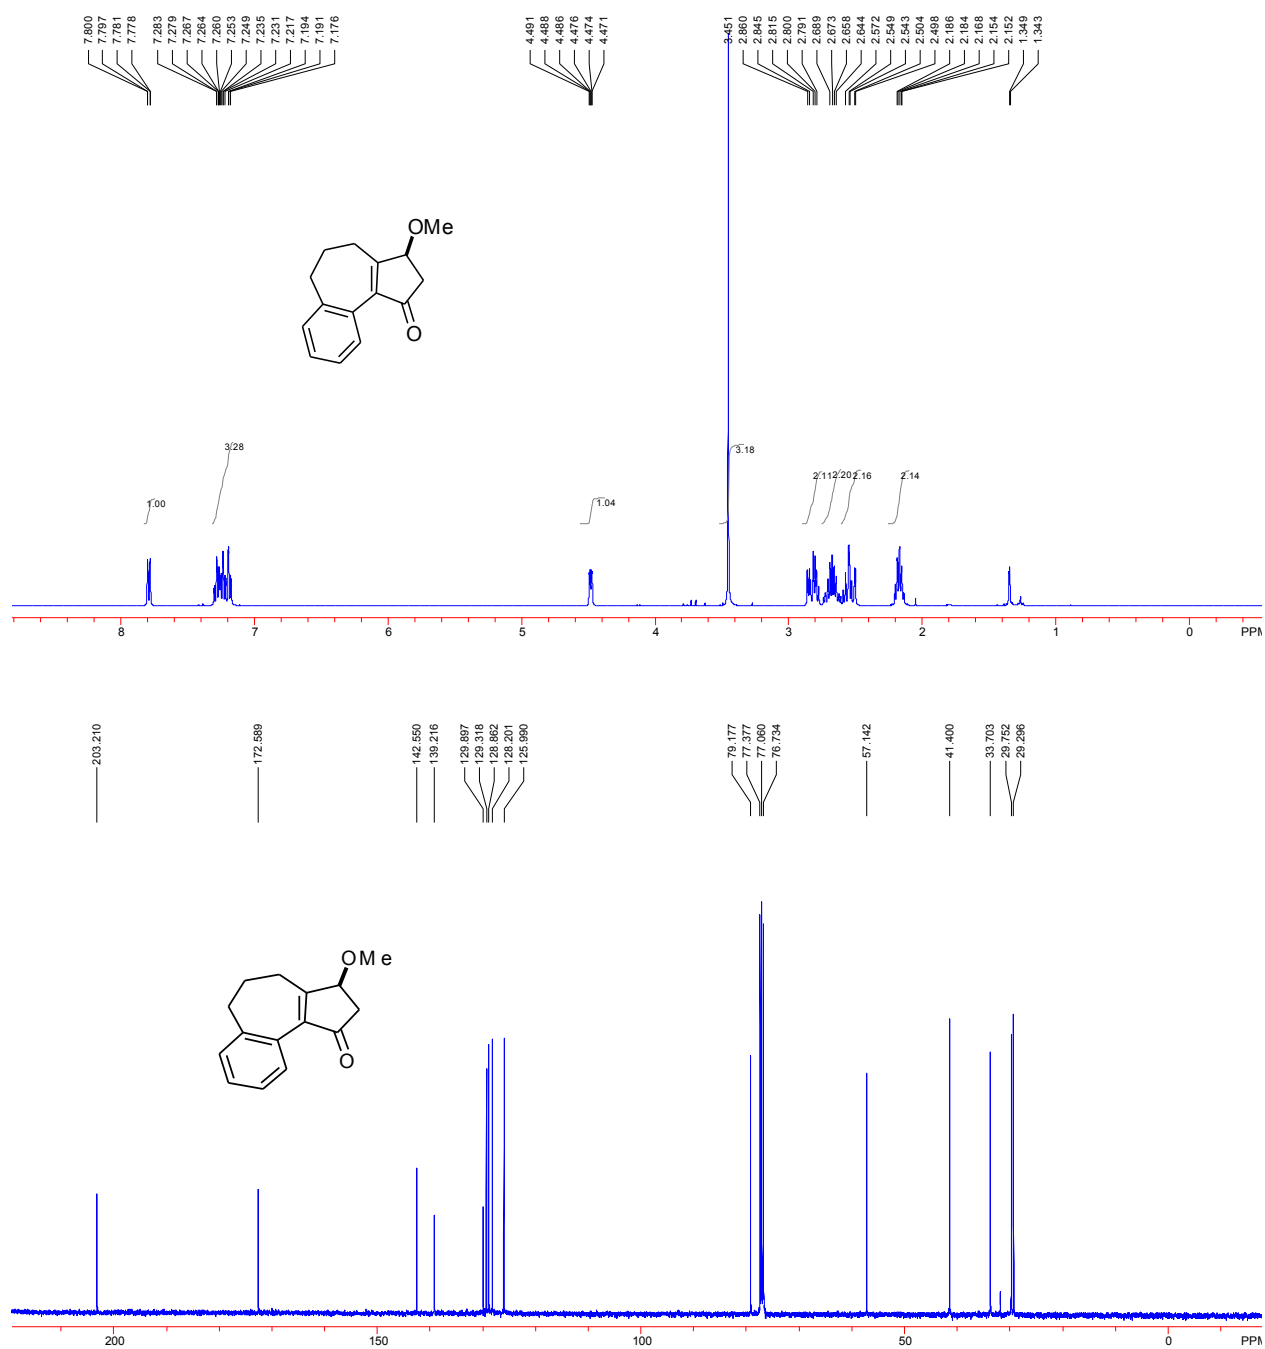

$^1\text{H}$  NMR (400 MHz,  $\text{CDCl}_3$ ) and  $^{13}\text{C}$  NMR (100 MHz,  $\text{CDCl}_3$ ) of **3o**

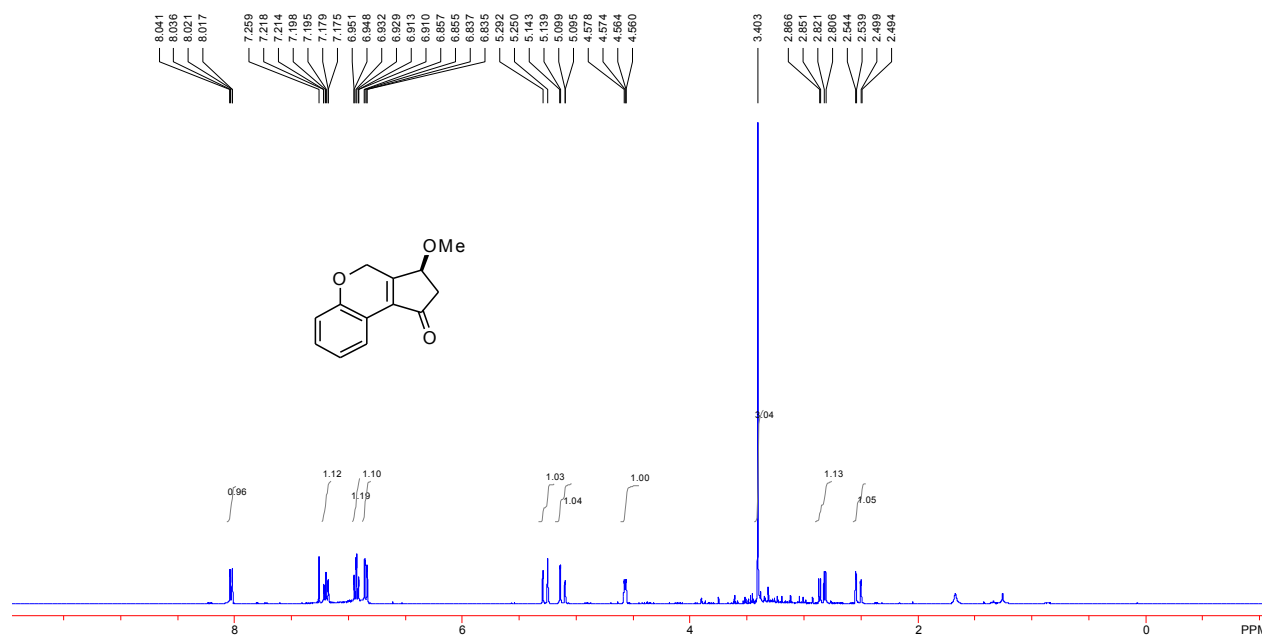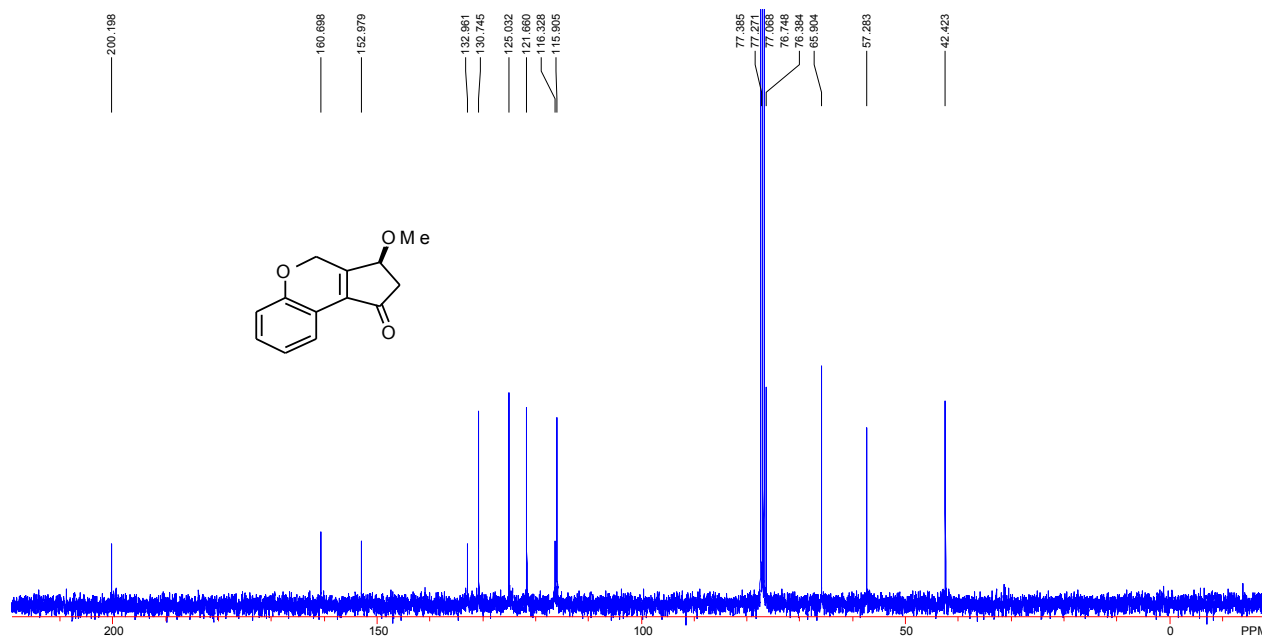

$^1\text{H}$  NMR (400 MHz,  $\text{CDCl}_3$ ) and  $^{13}\text{C}$  NMR (100 MHz,  $\text{CDCl}_3$ ) of **3p**

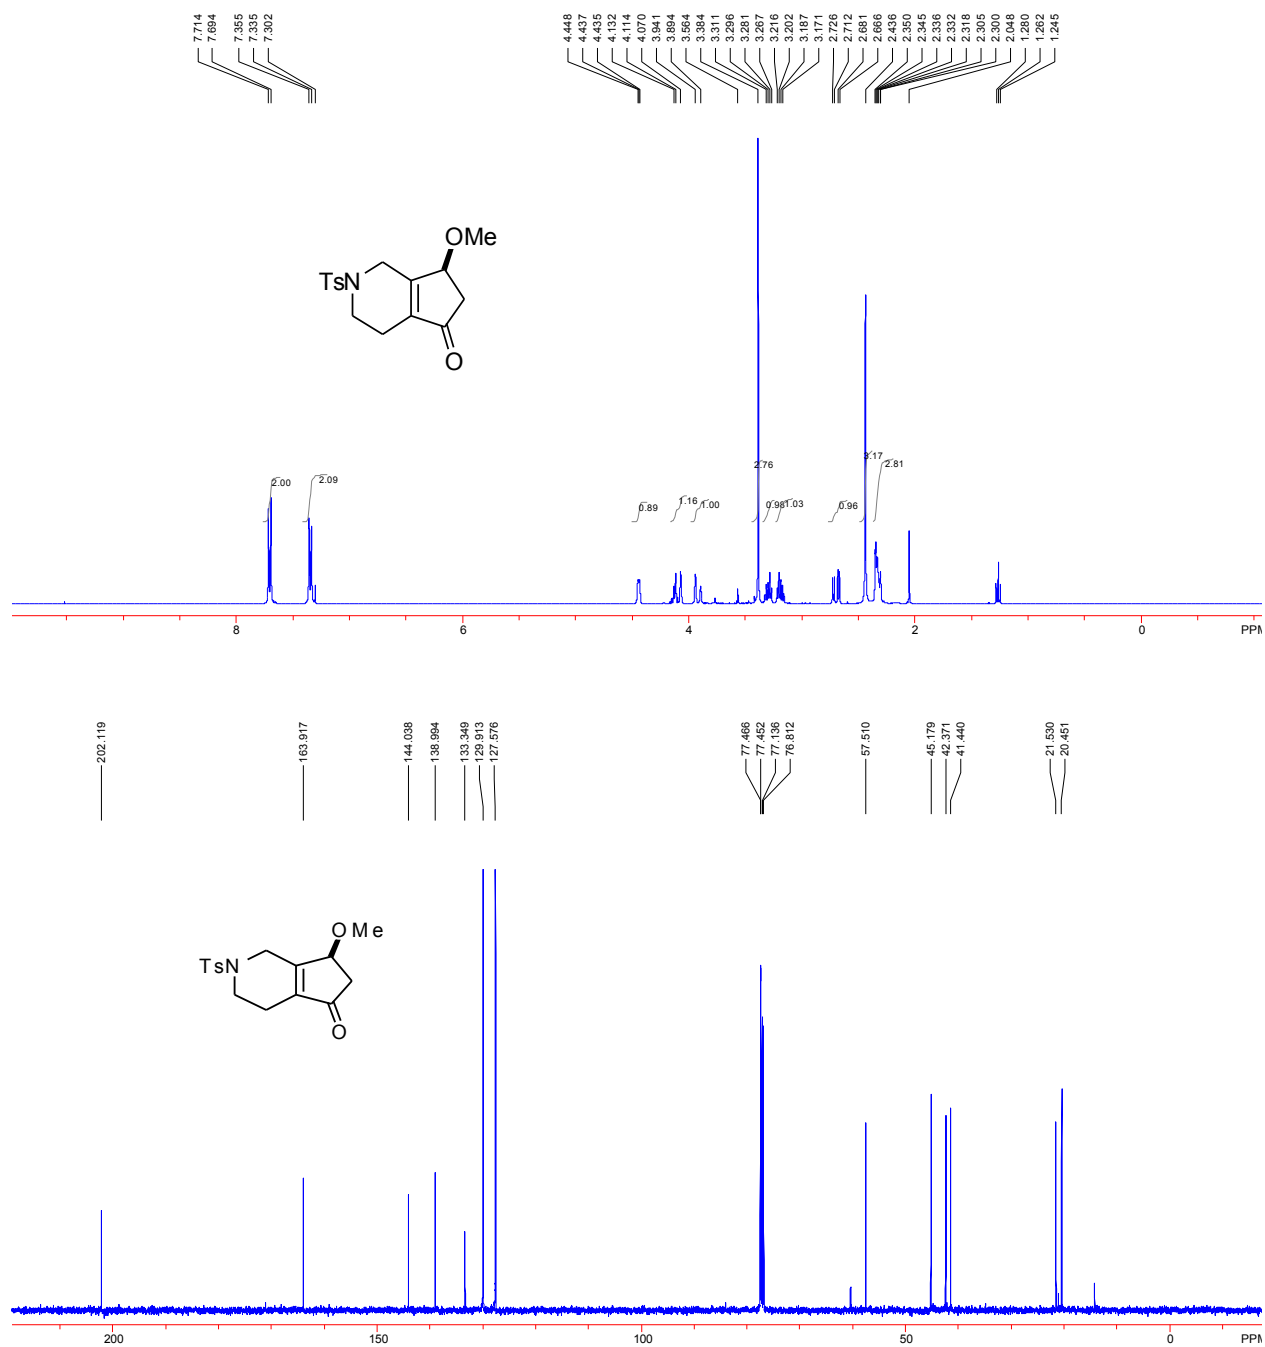

$^1\text{H}$  NMR (400 MHz,  $\text{CDCl}_3$ ) and  $^{13}\text{C}$  NMR (100 MHz,  $\text{CDCl}_3$ ) of **3q**

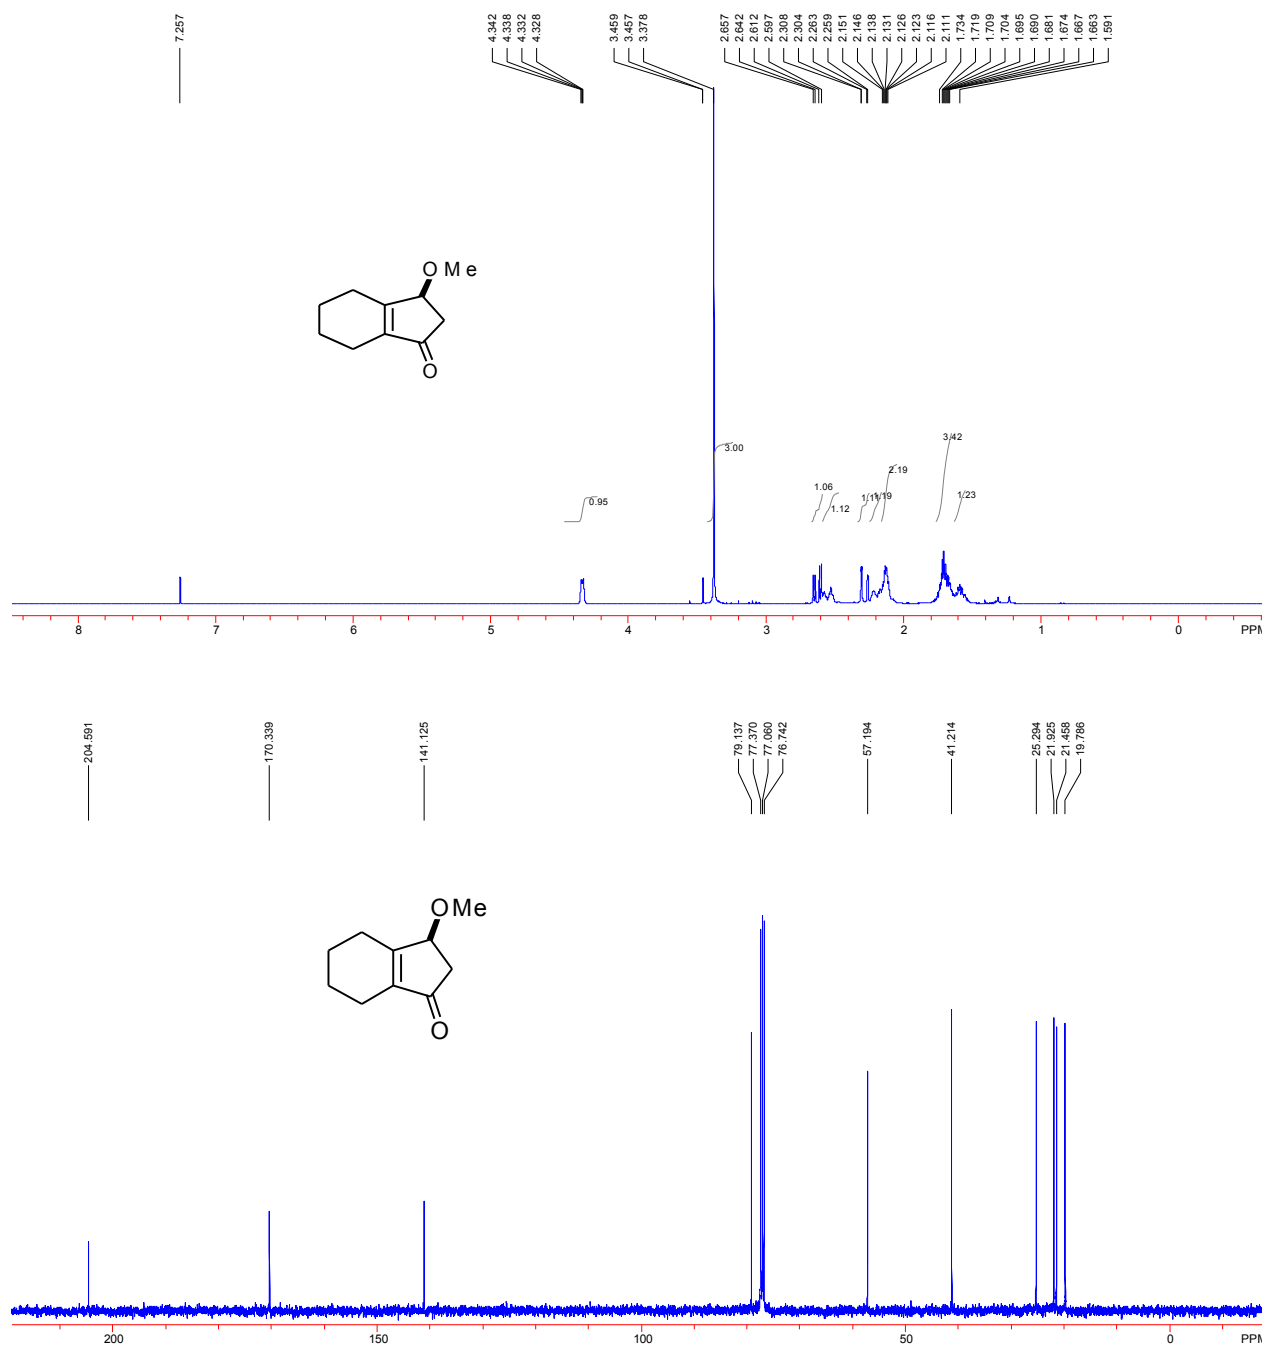

$^1\text{H}$  NMR (400 MHz,  $\text{CDCl}_3$ ) and  $^{13}\text{C}$  NMR (100 MHz,  $\text{CDCl}_3$ ) of **4**

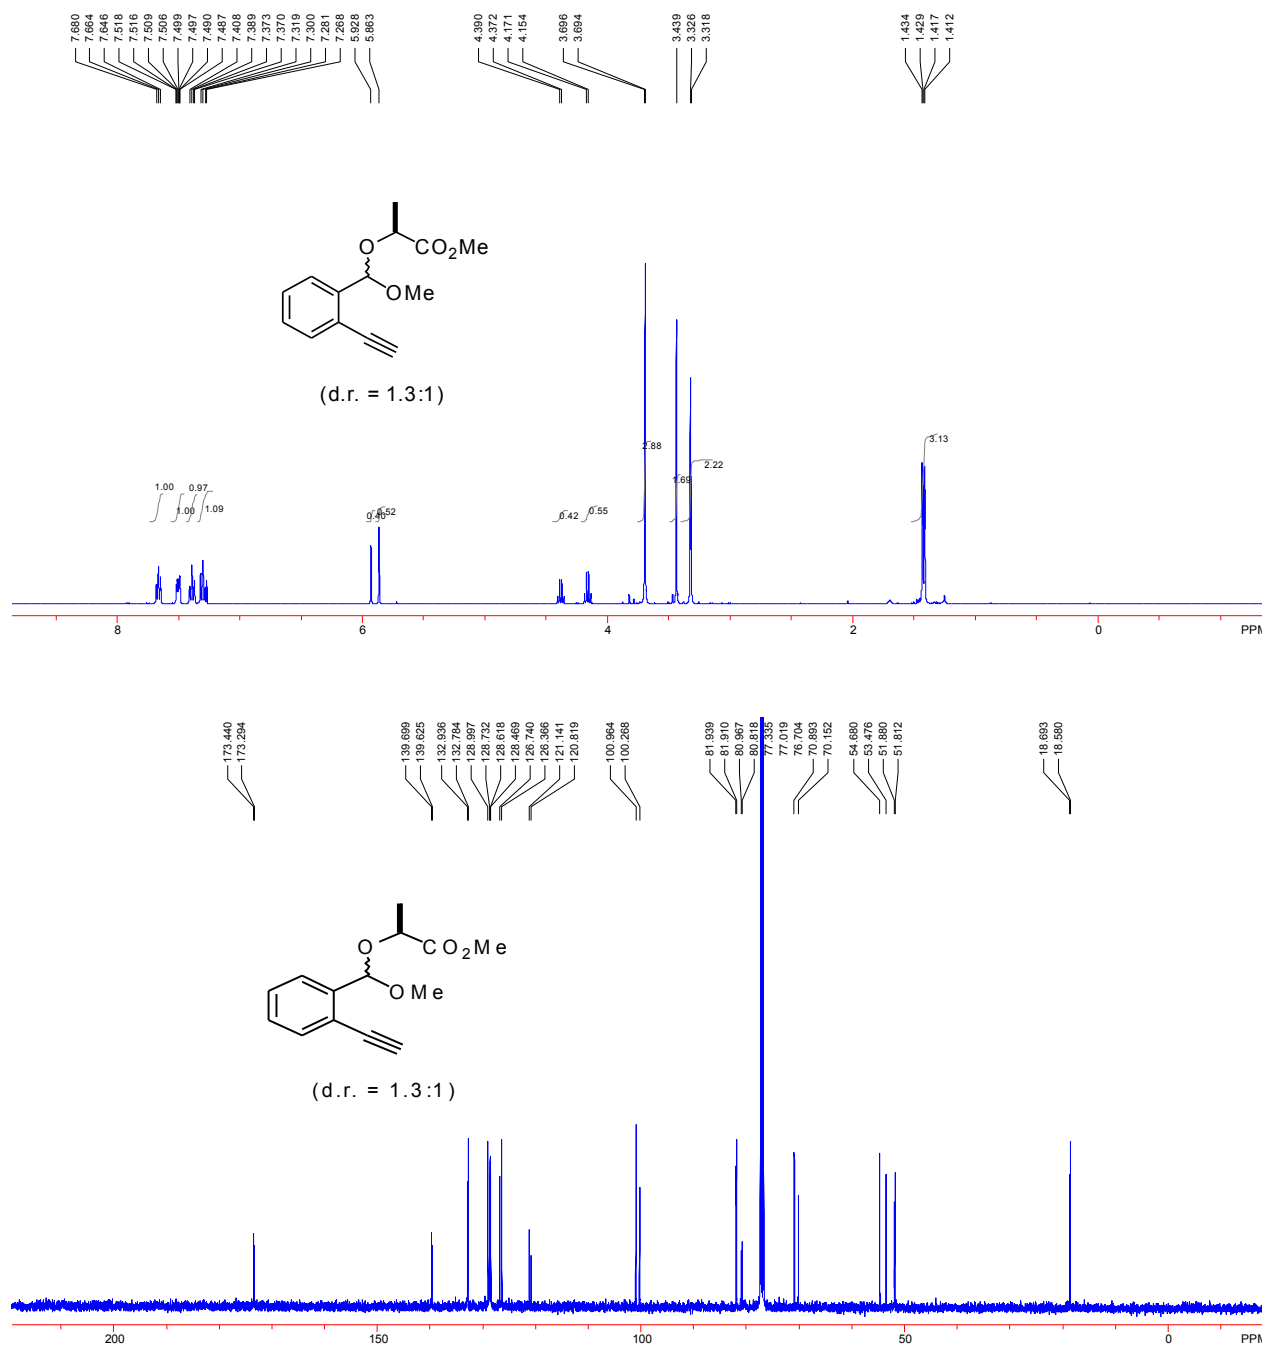



$^1\text{H}$  NMR (400 MHz,  $\text{CDCl}_3$ ) and  $^{13}\text{C}$  NMR (100 MHz,  $\text{CDCl}_3$ ) of **5a**

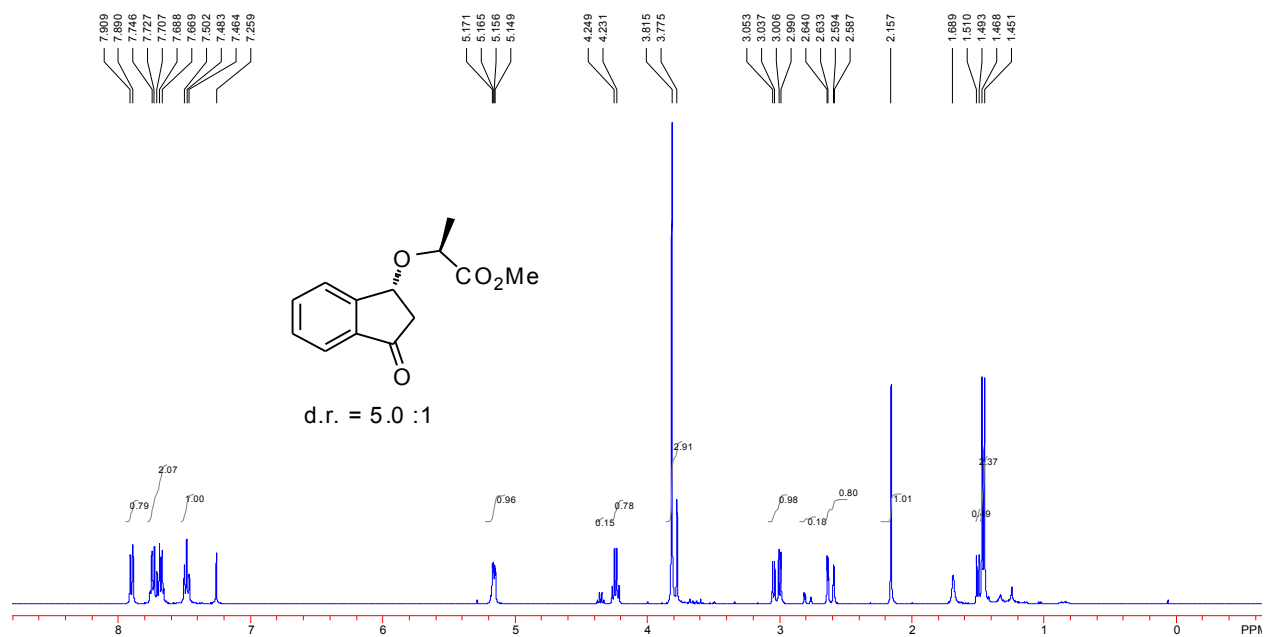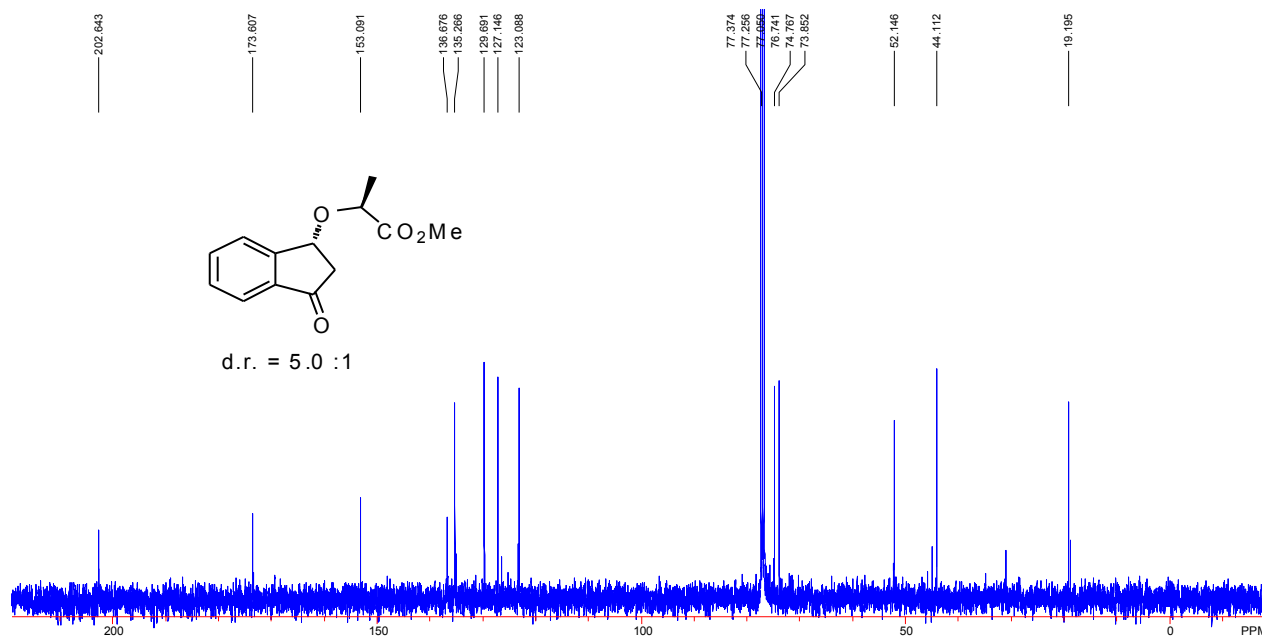

$^1\text{H}$  NMR (400 MHz,  $\text{CDCl}_3$ ) and  $^{13}\text{C}$  NMR (100 MHz,  $\text{CDCl}_3$ ) of **5b**

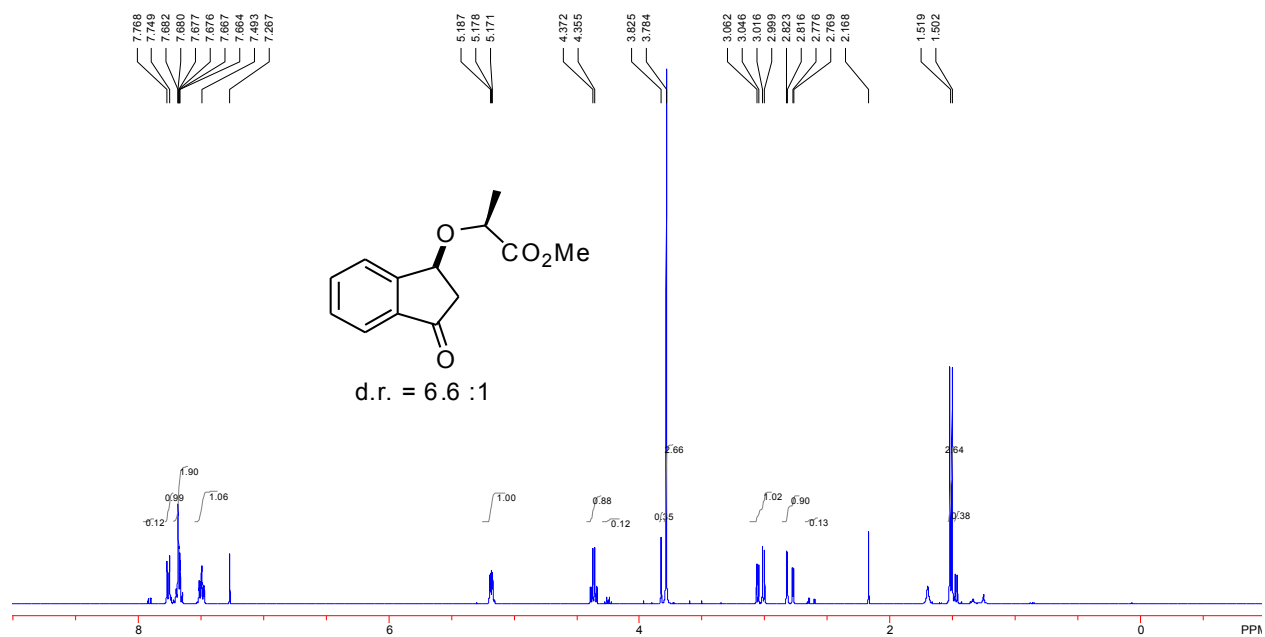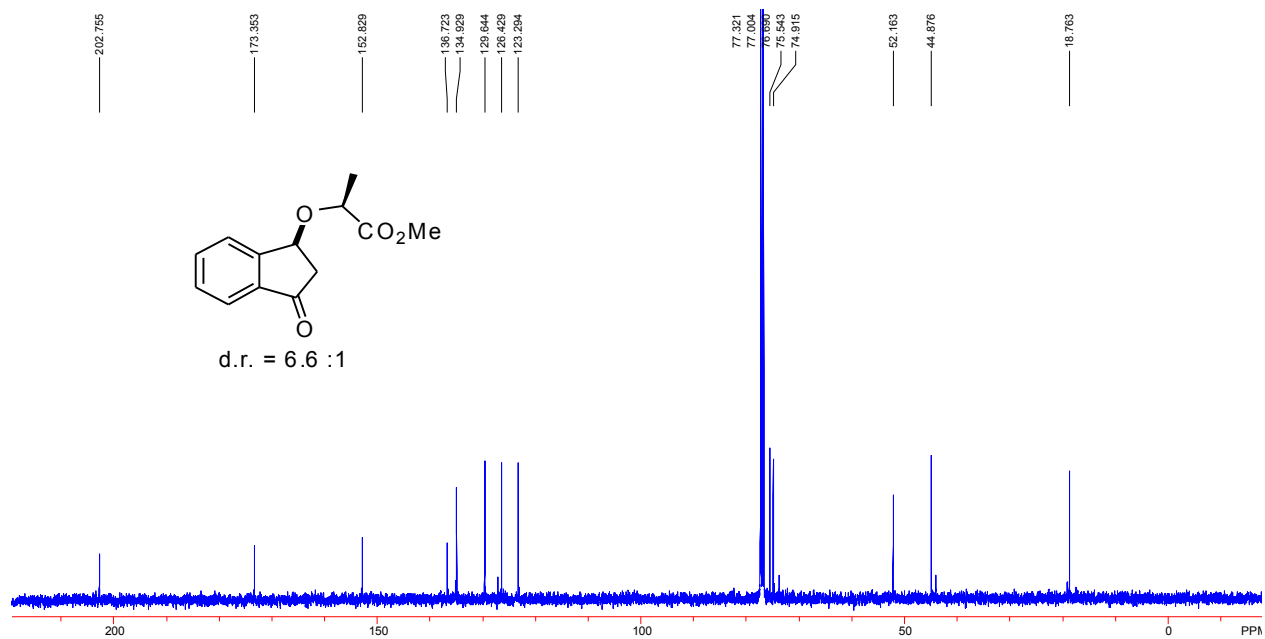

## 8. Copies of Chiral HPLC Analysis

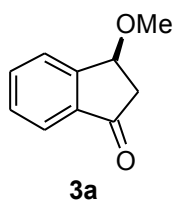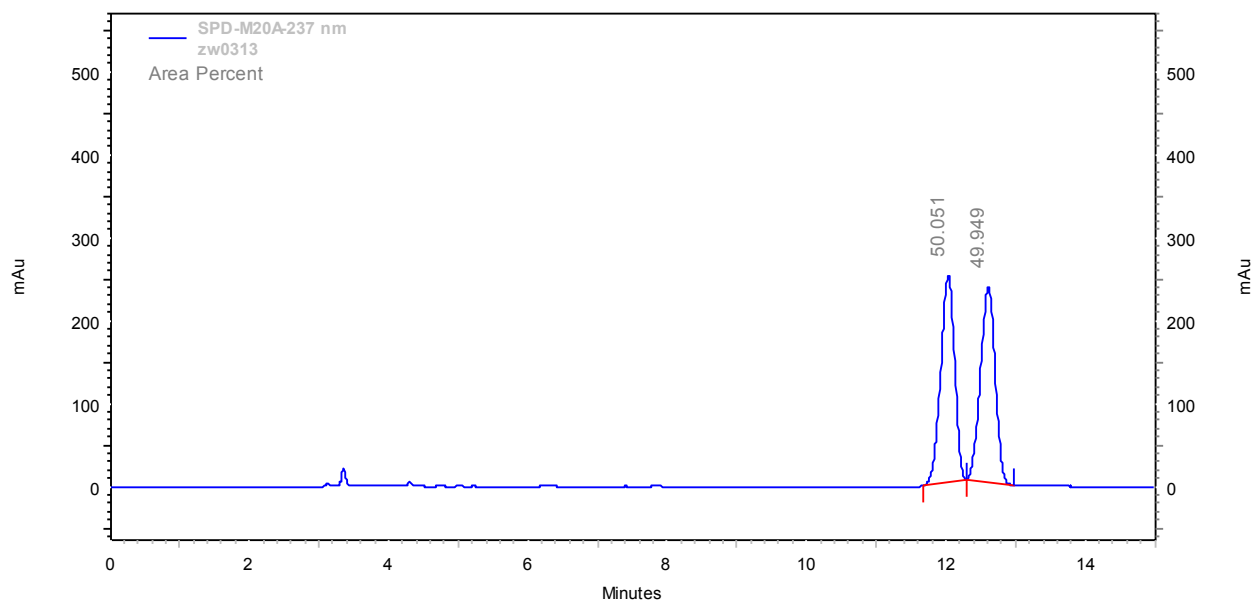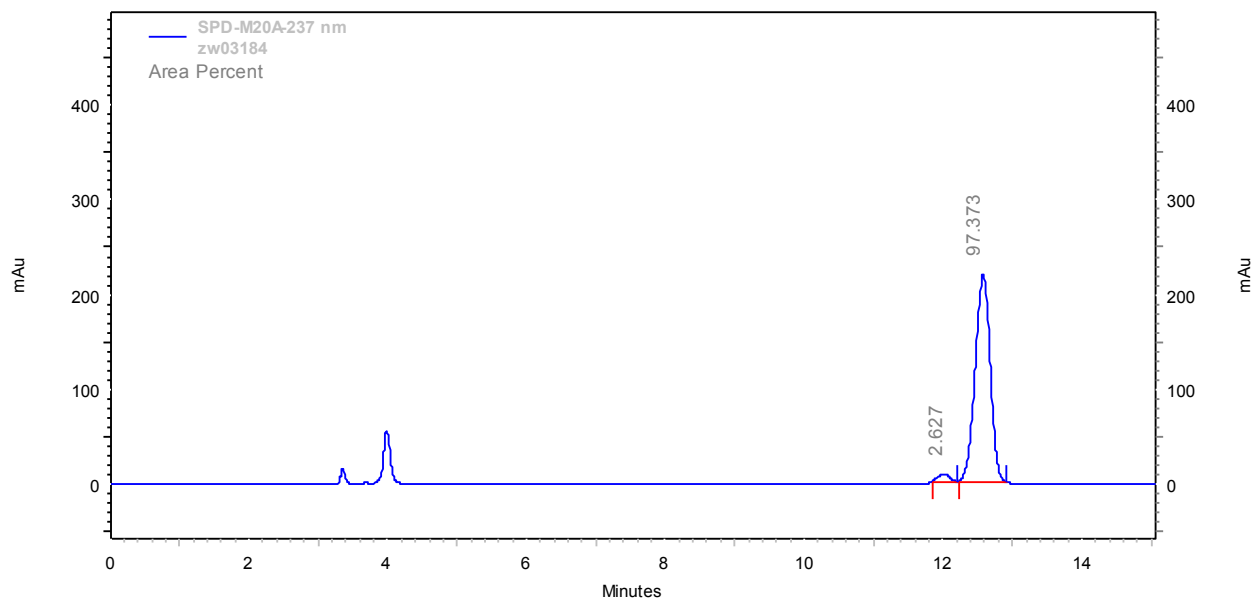

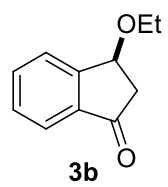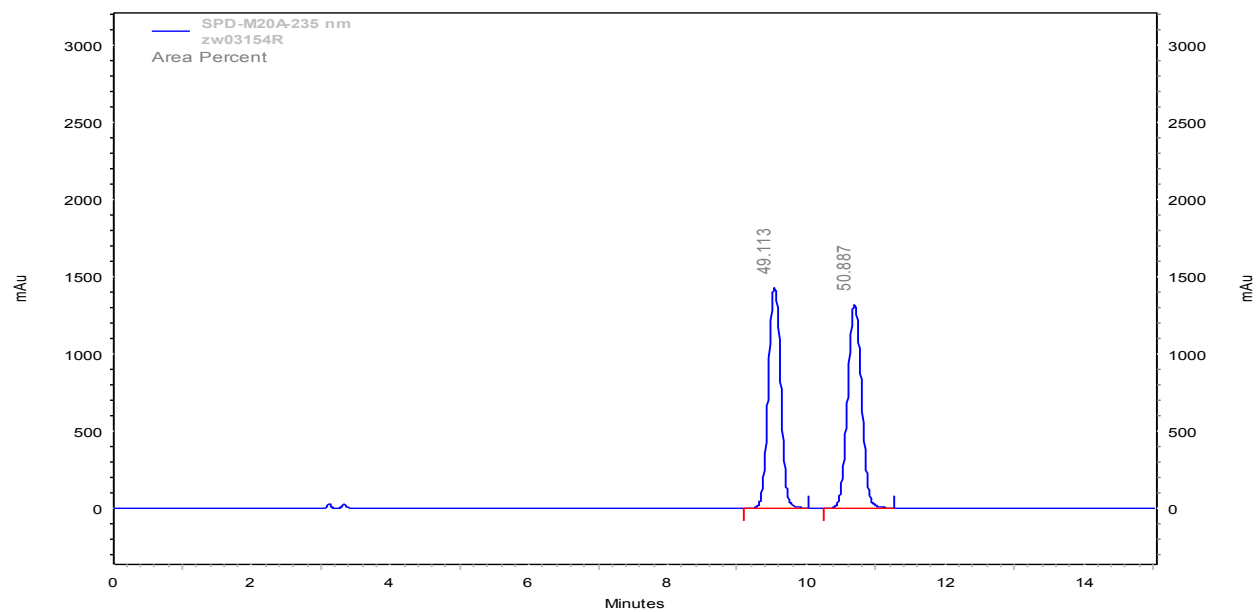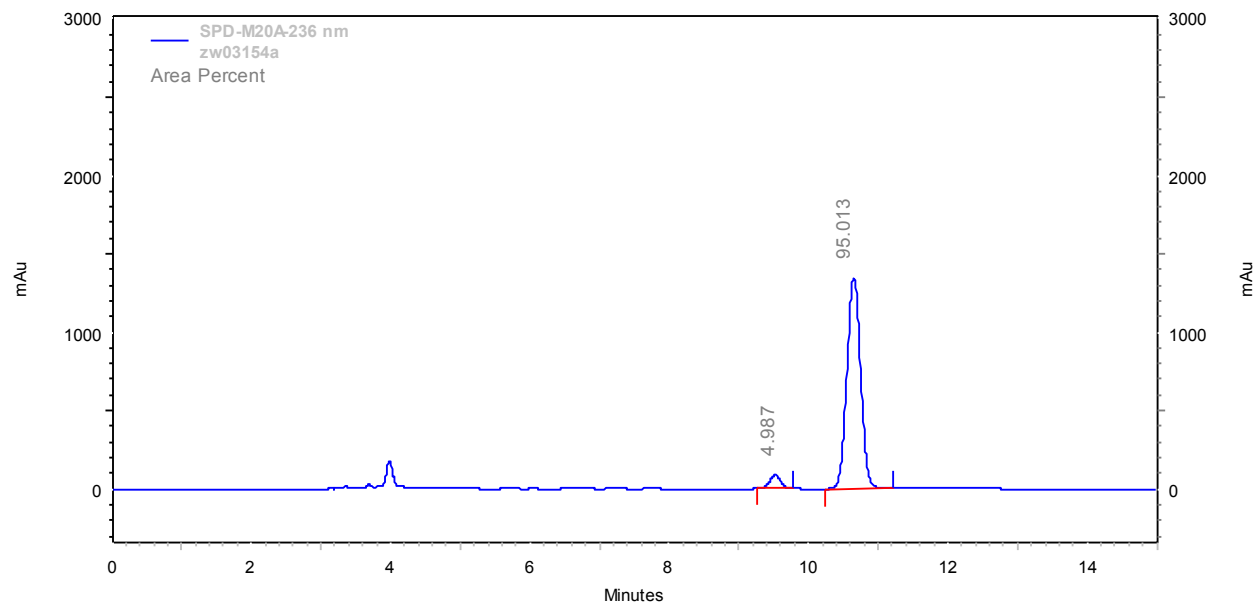

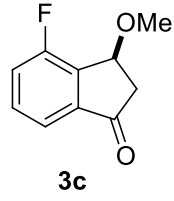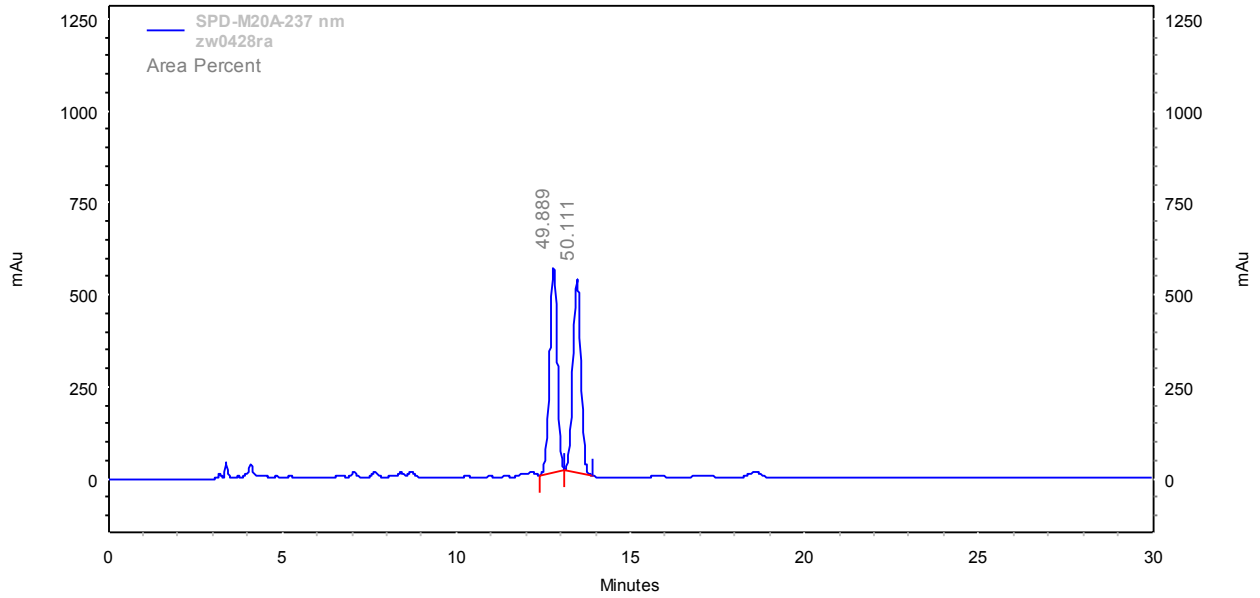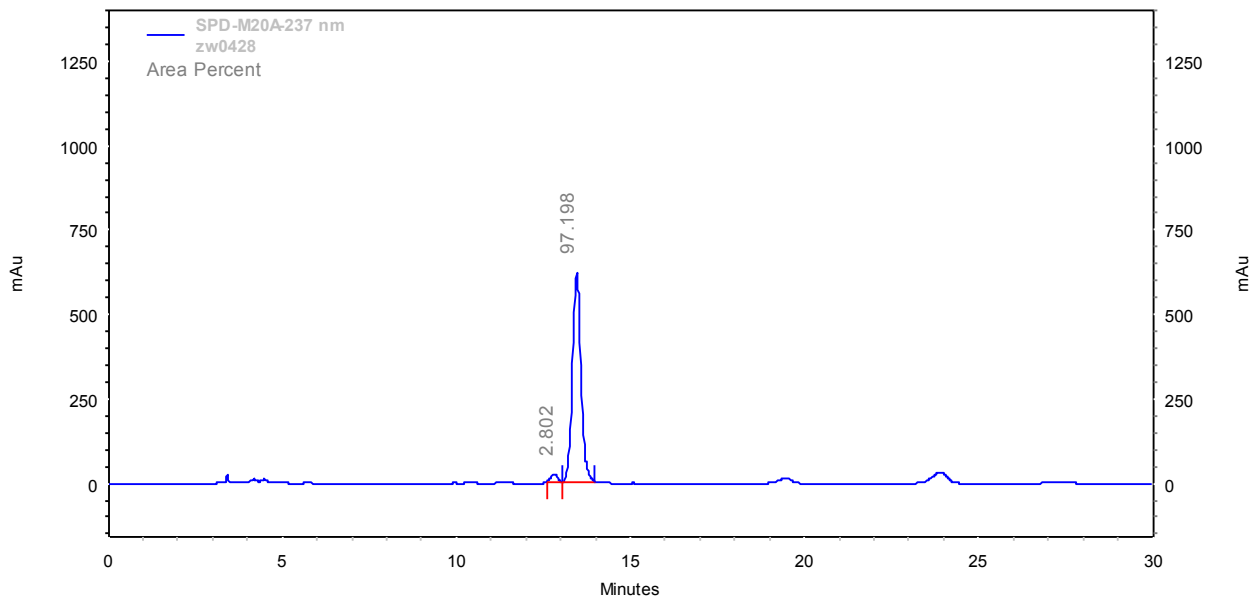

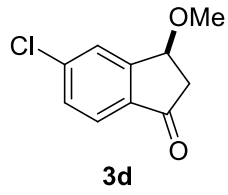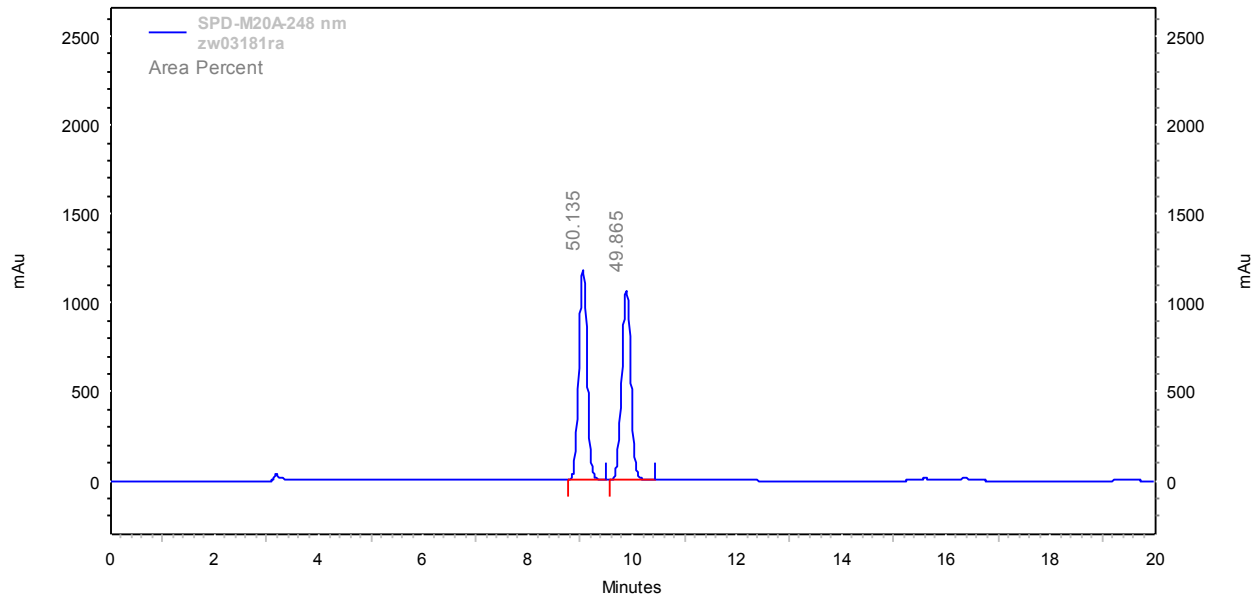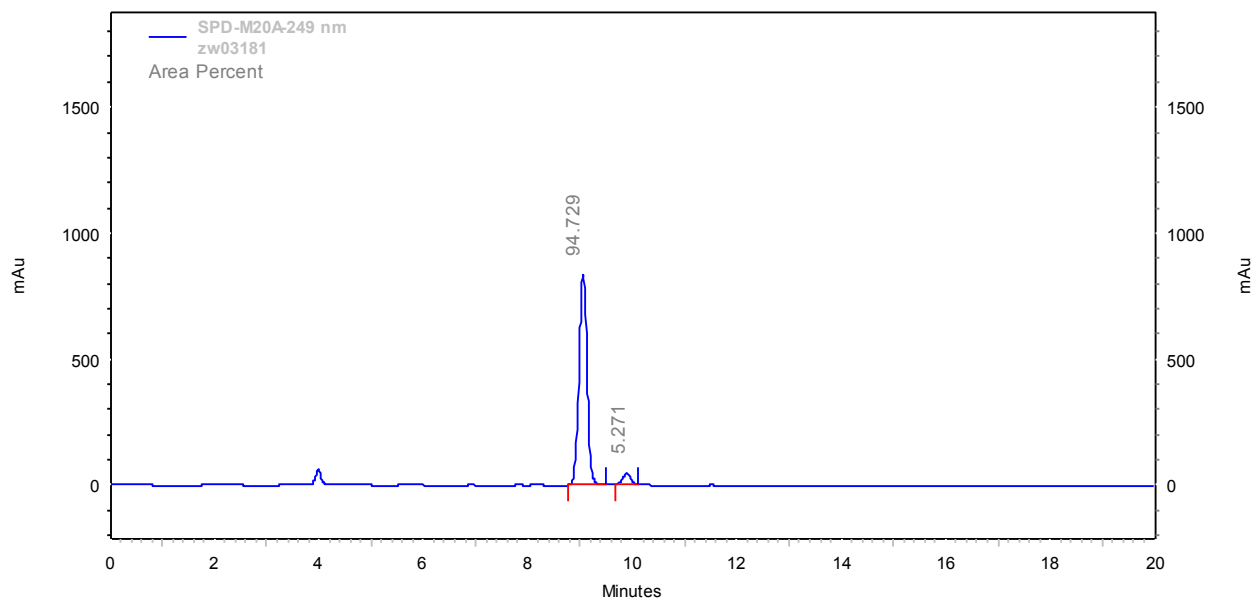

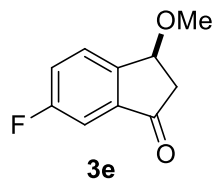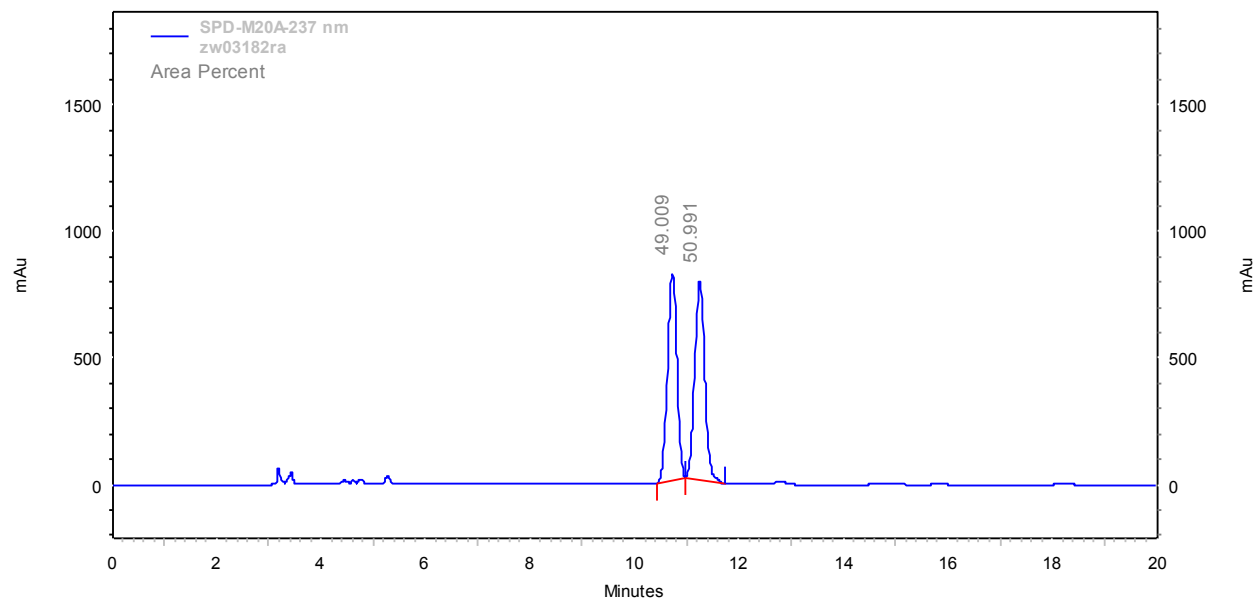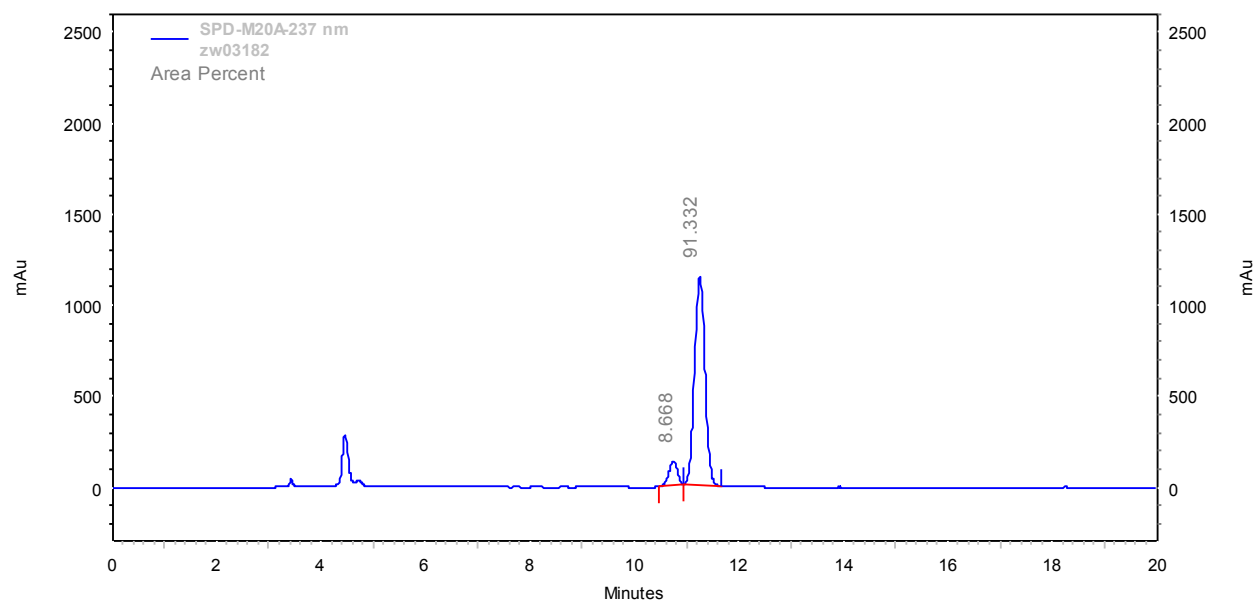

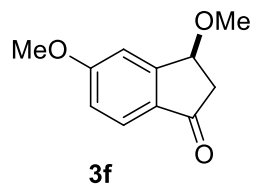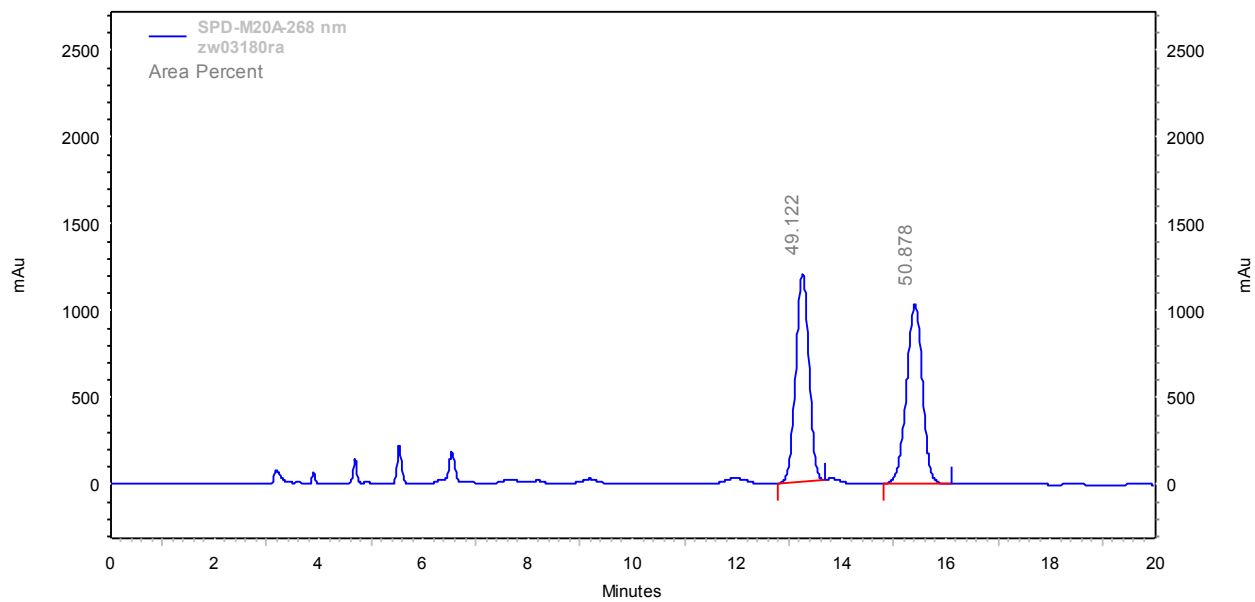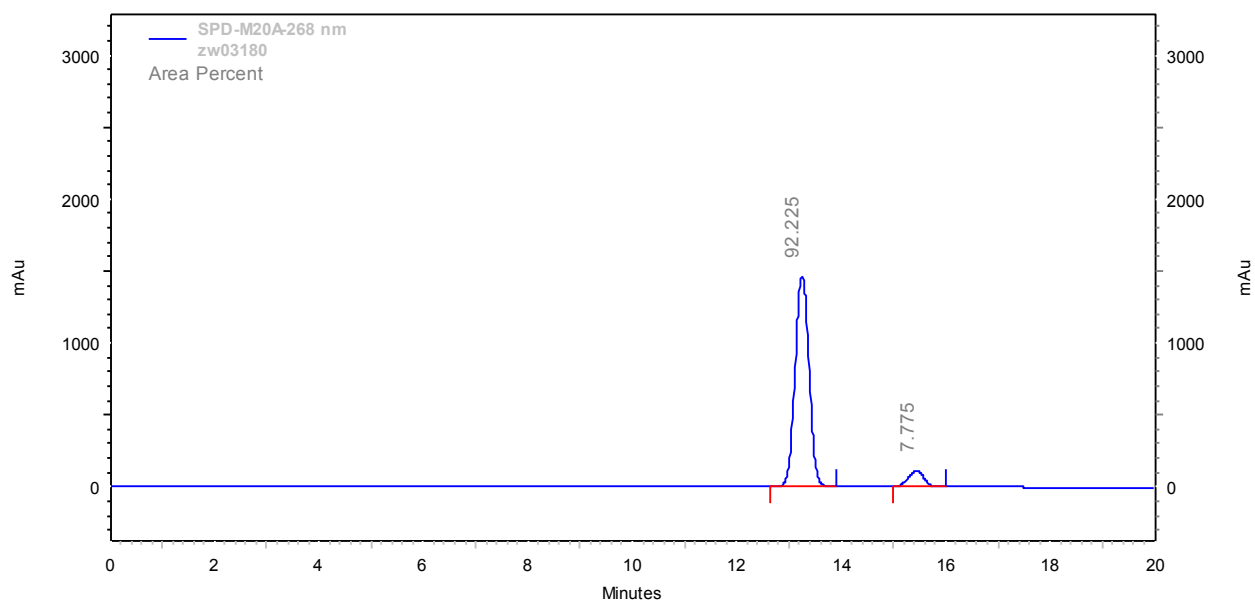



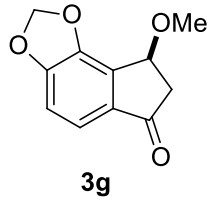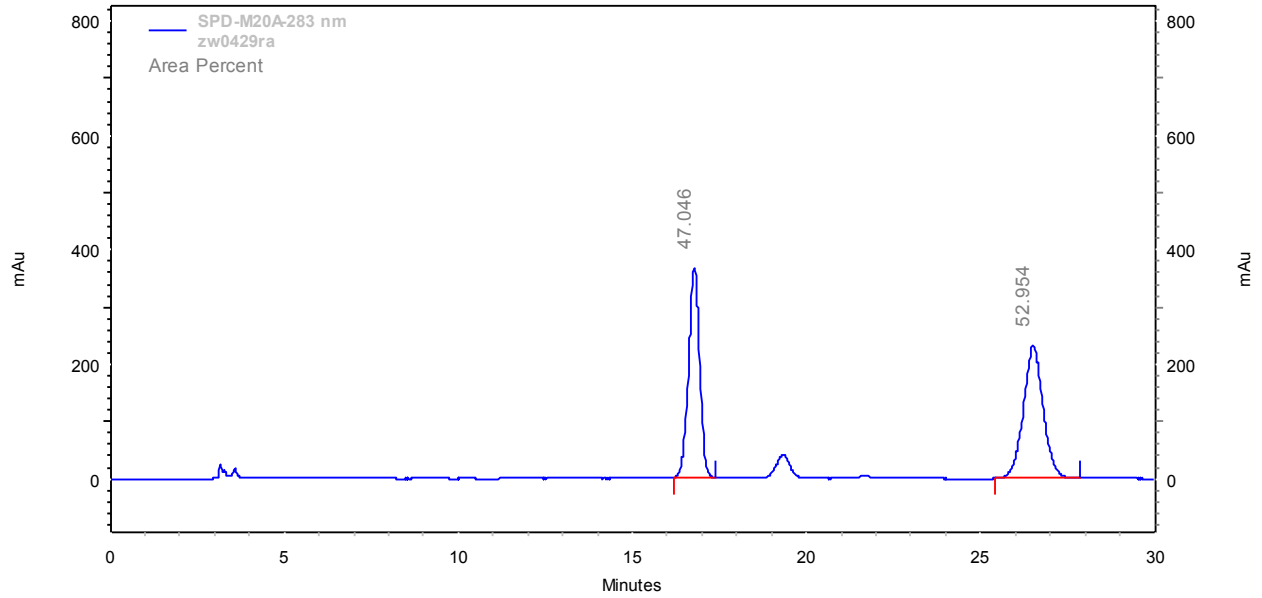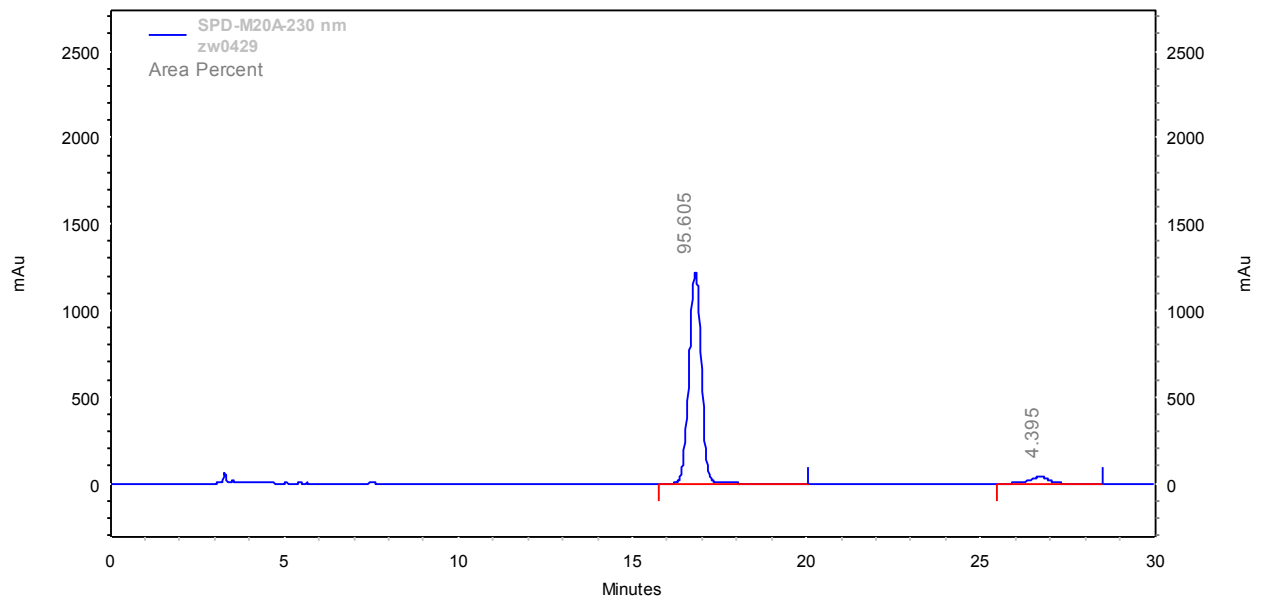

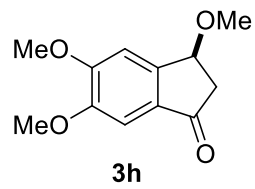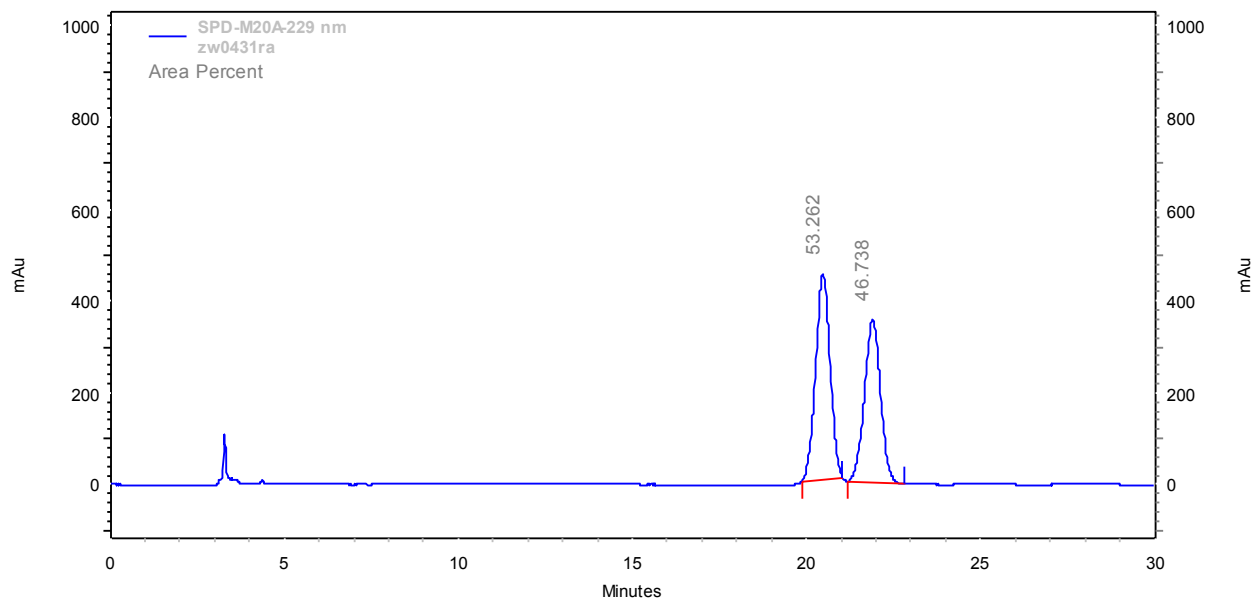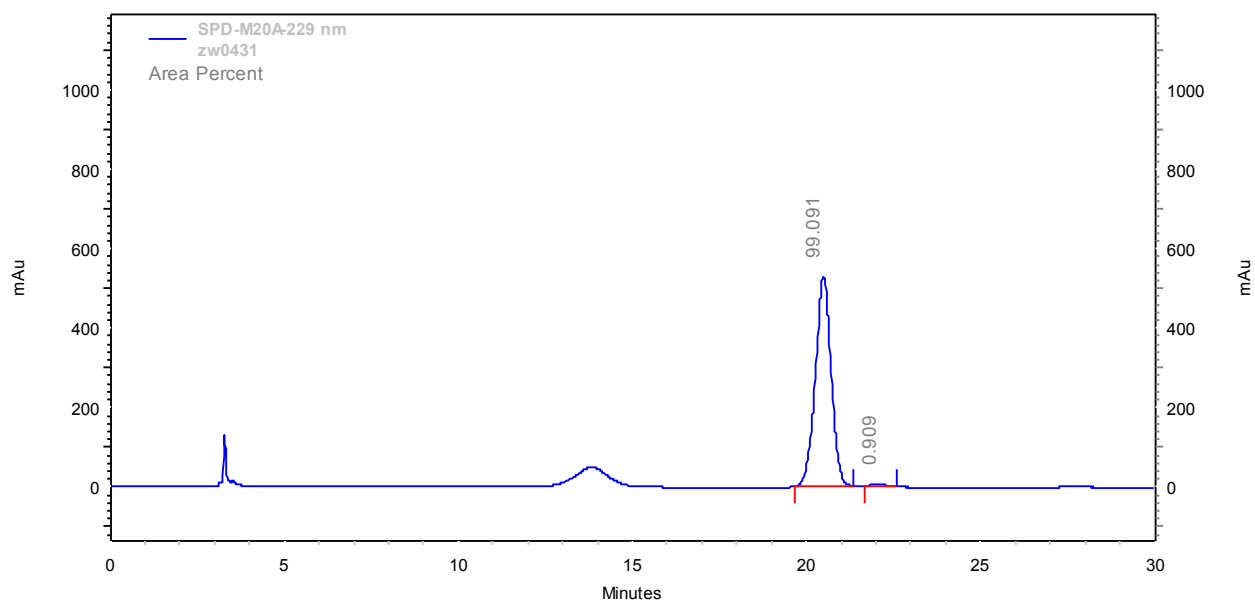

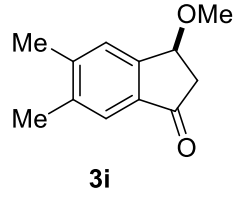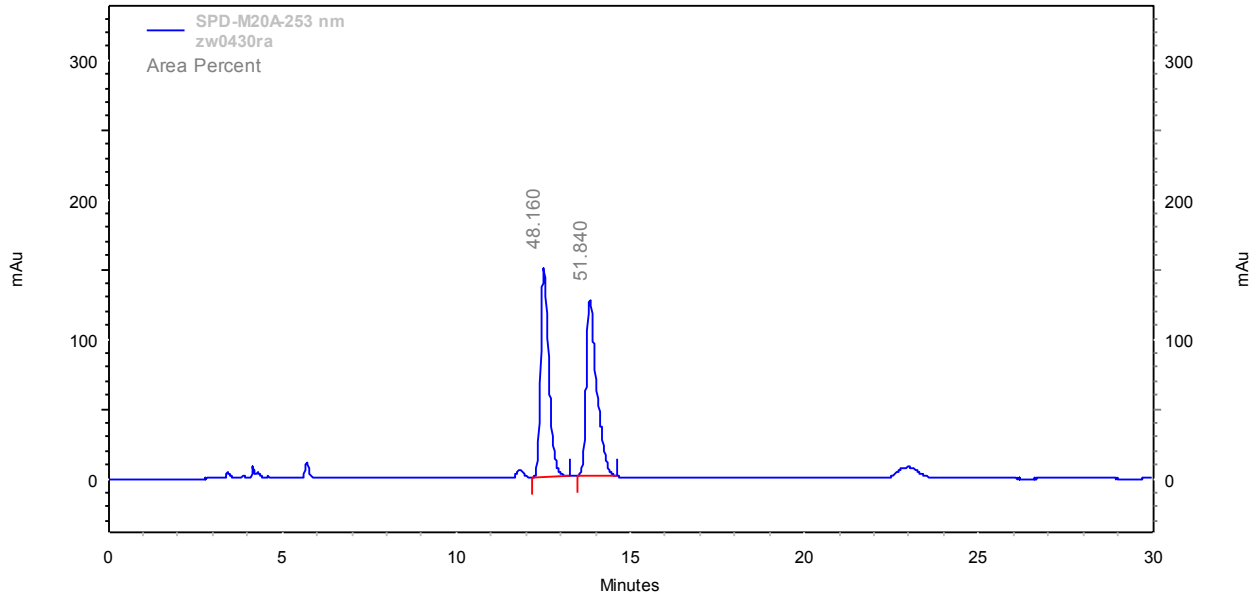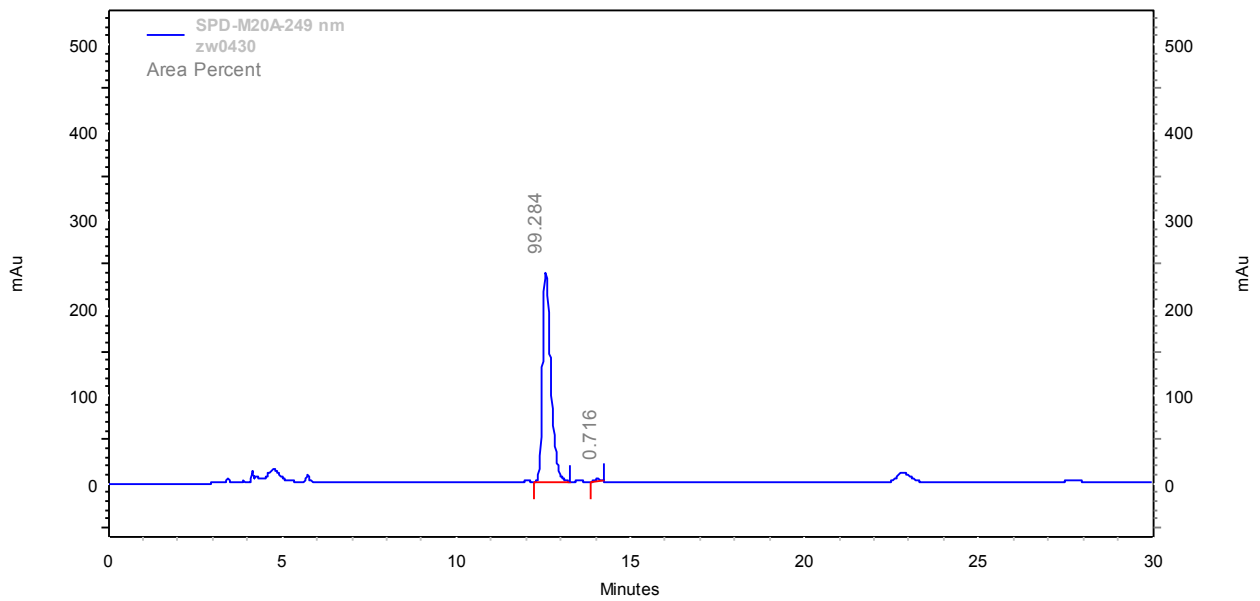

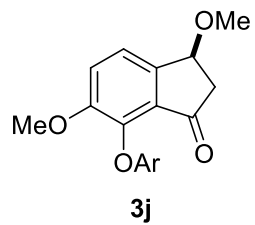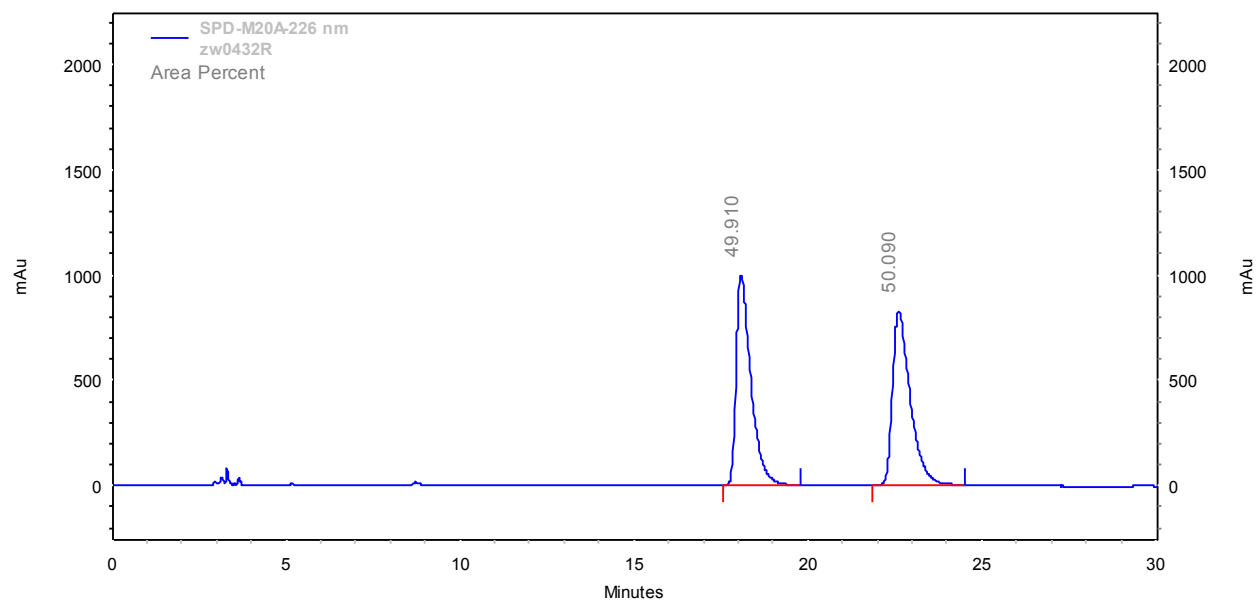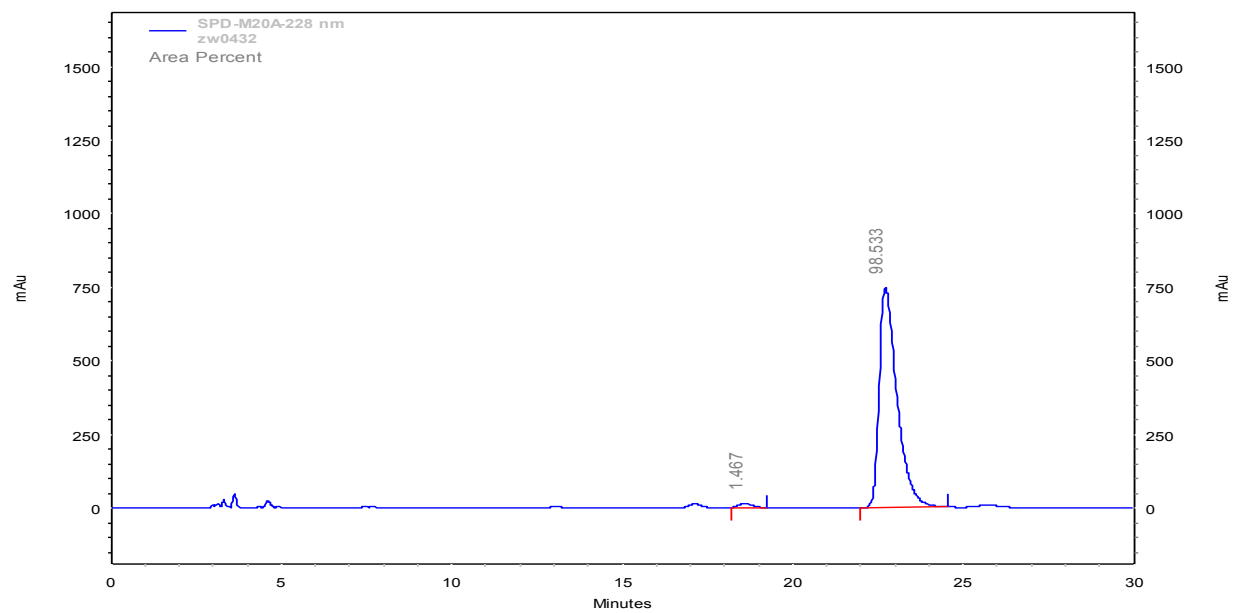

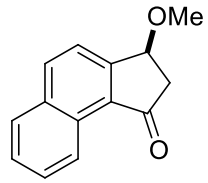

**3k**

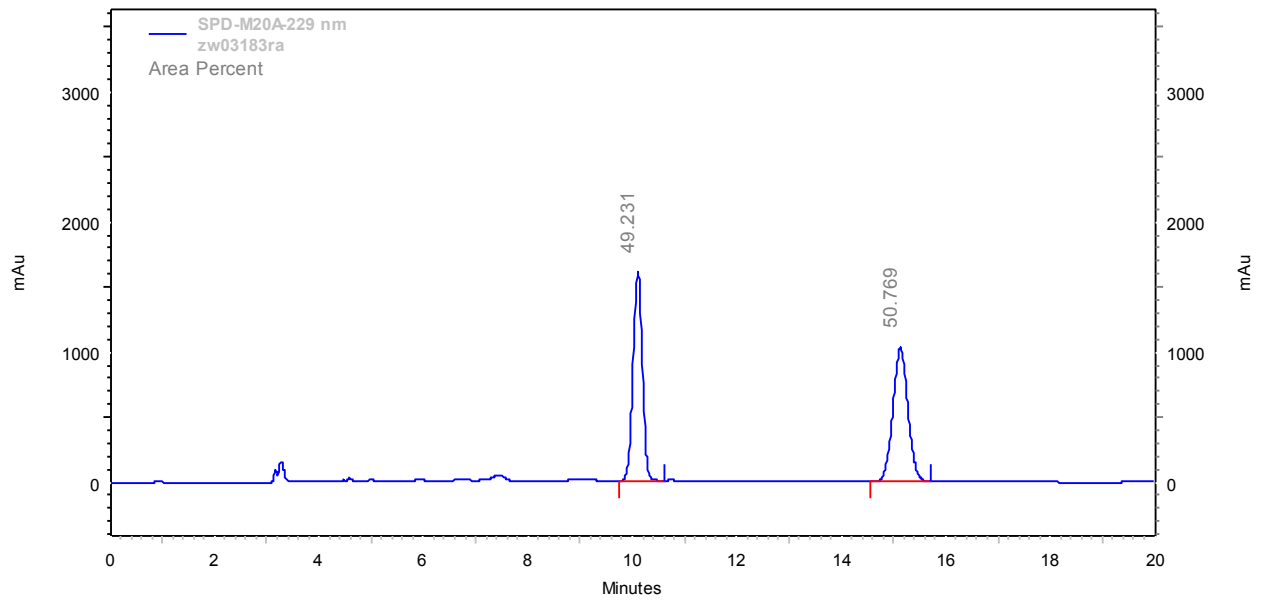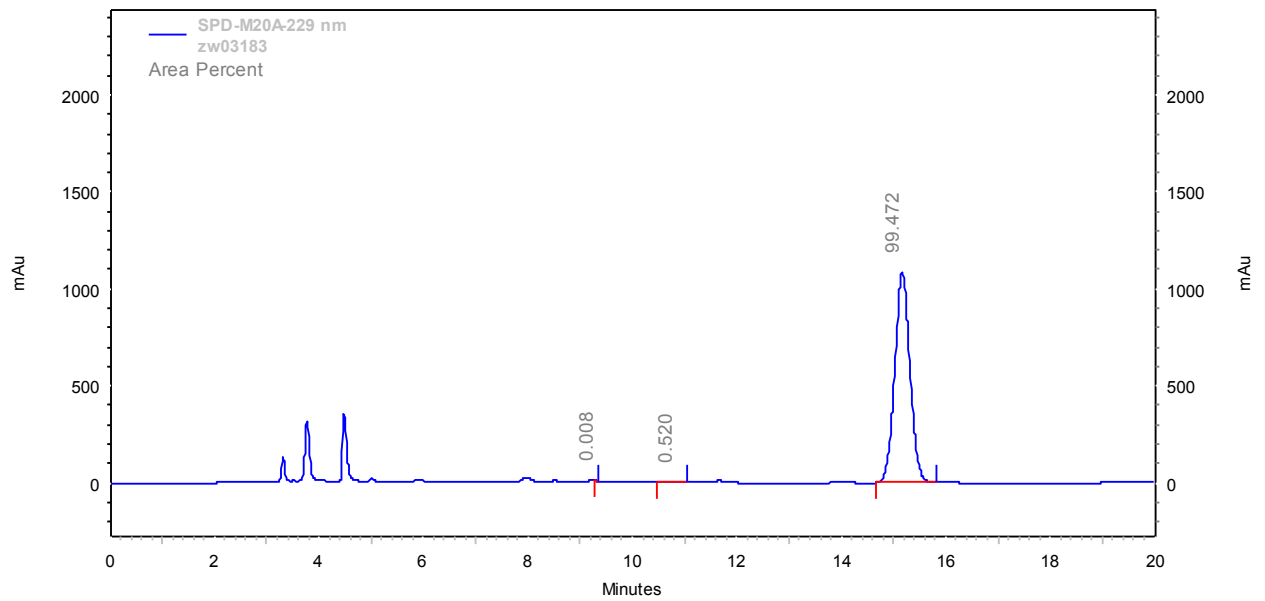

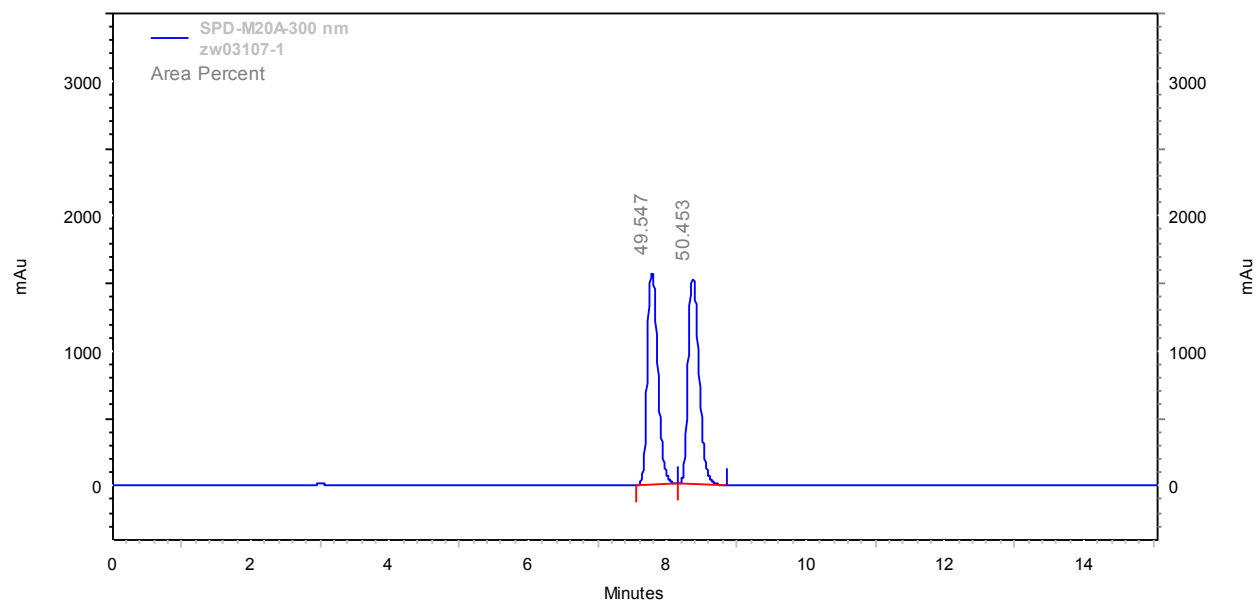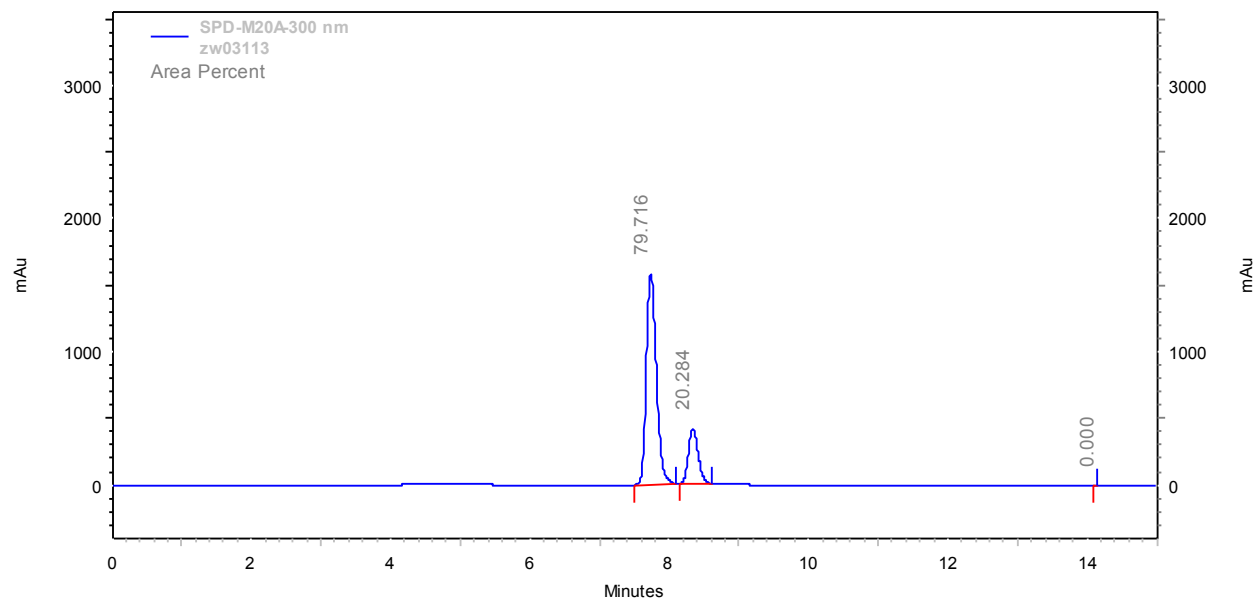

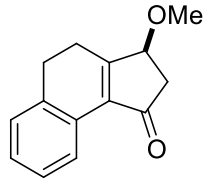

3m

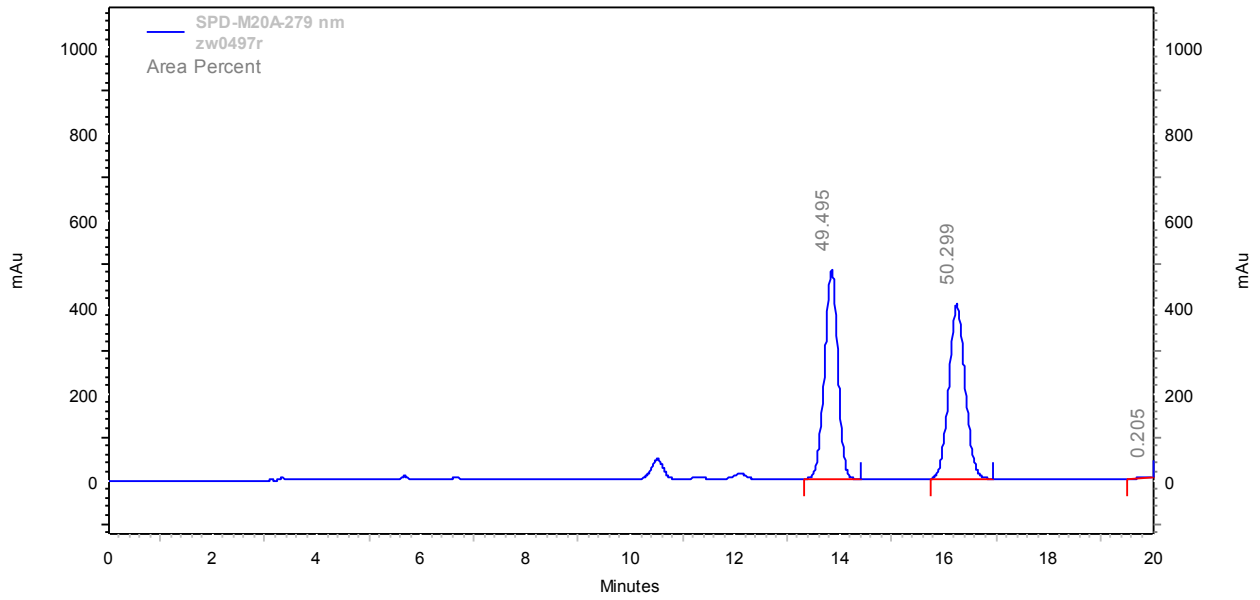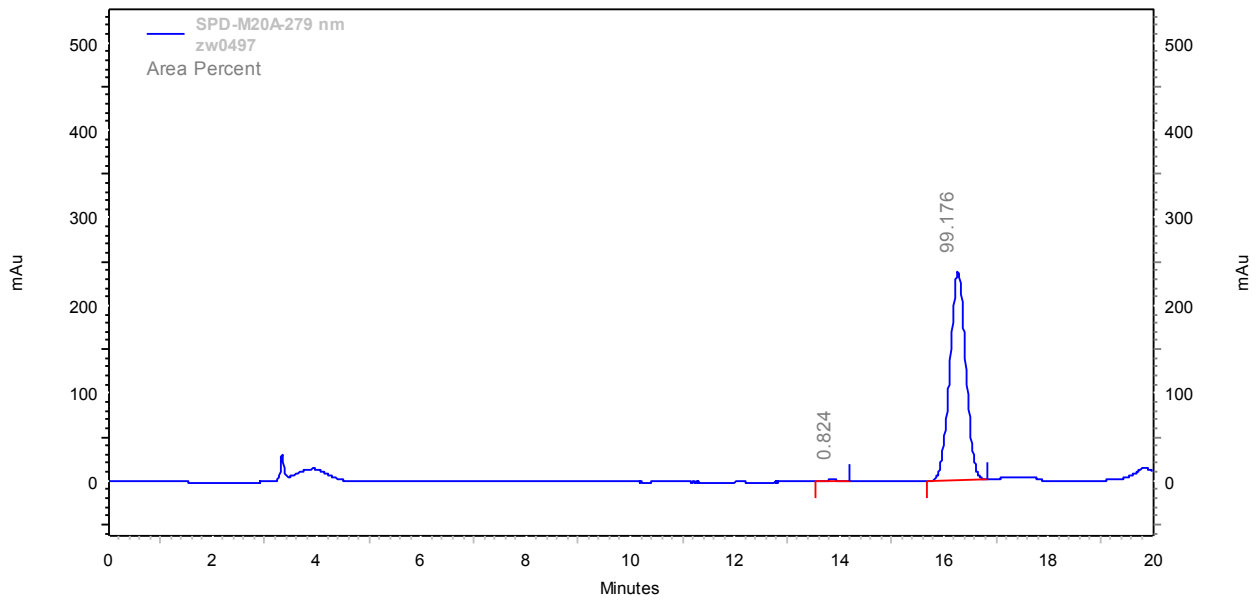

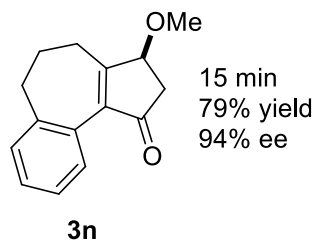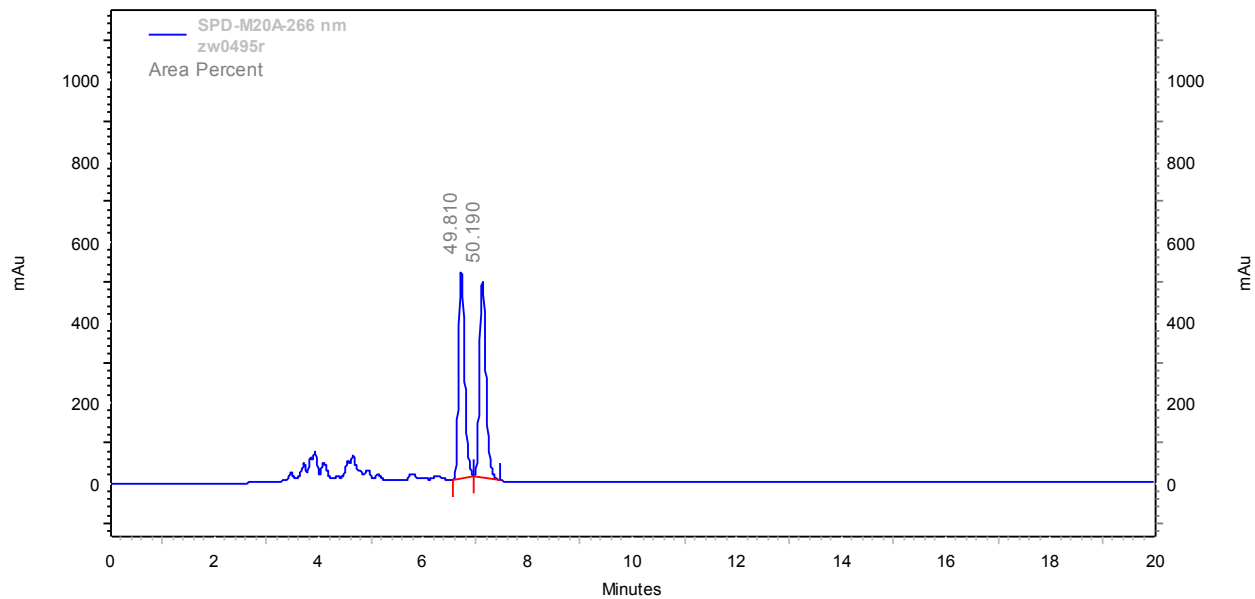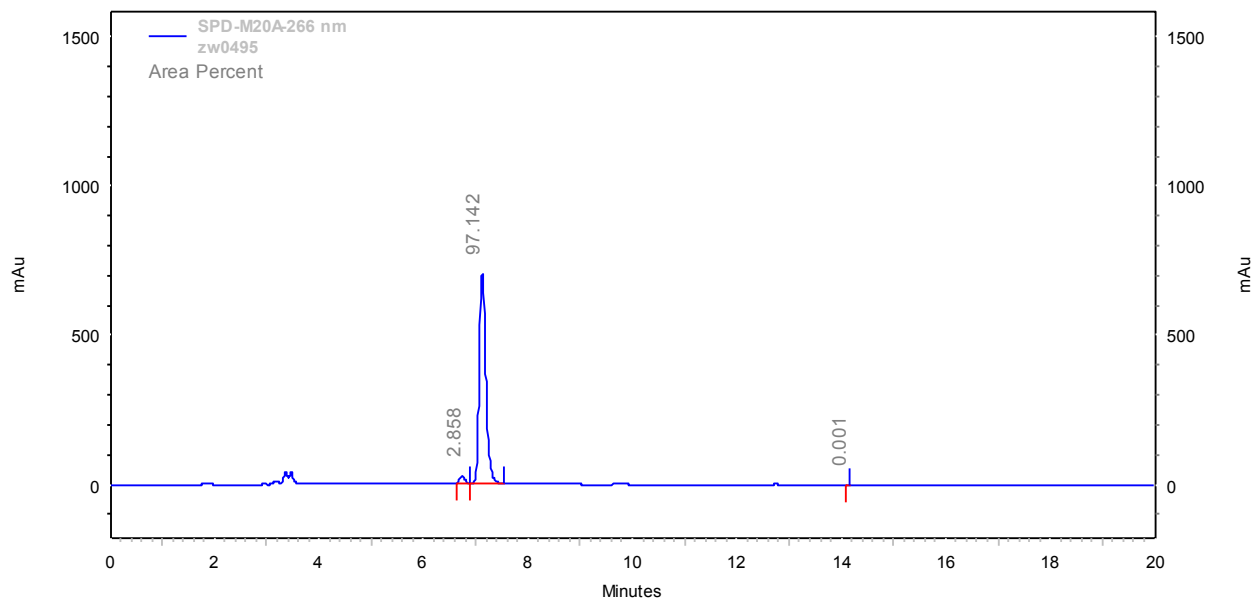



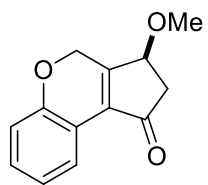

**3o**

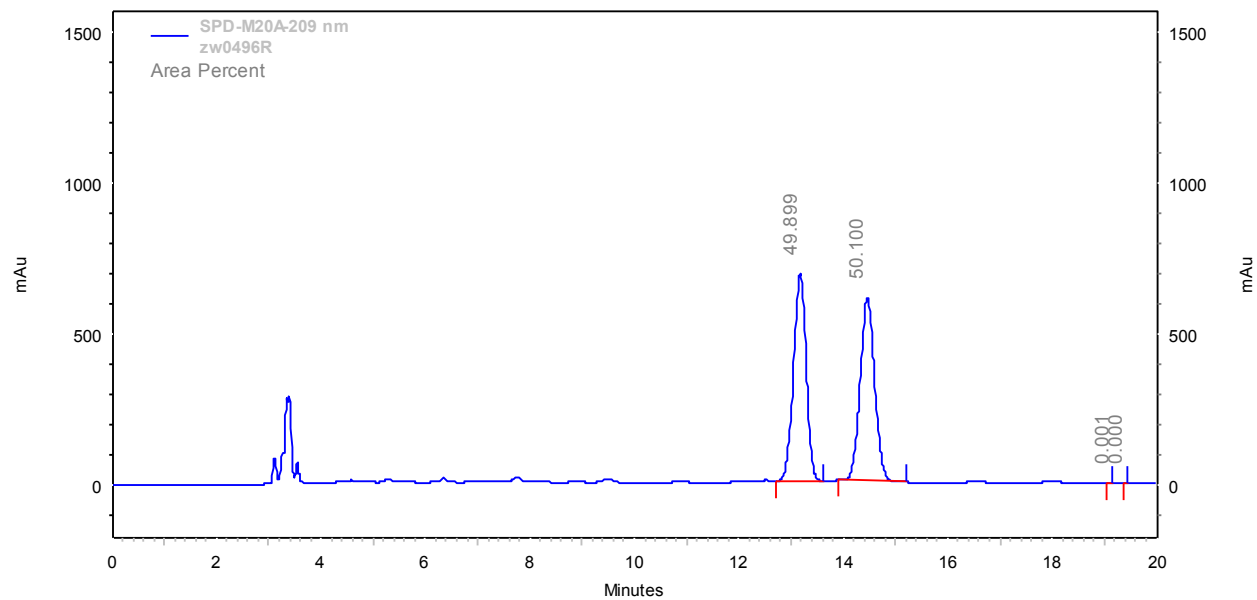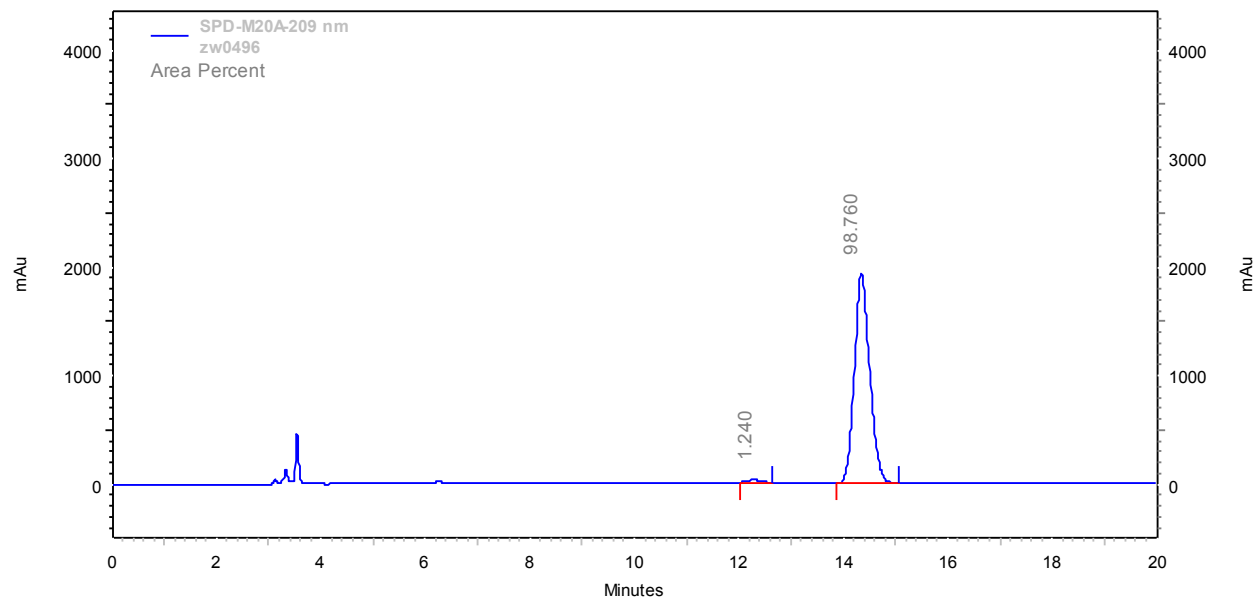

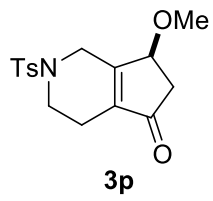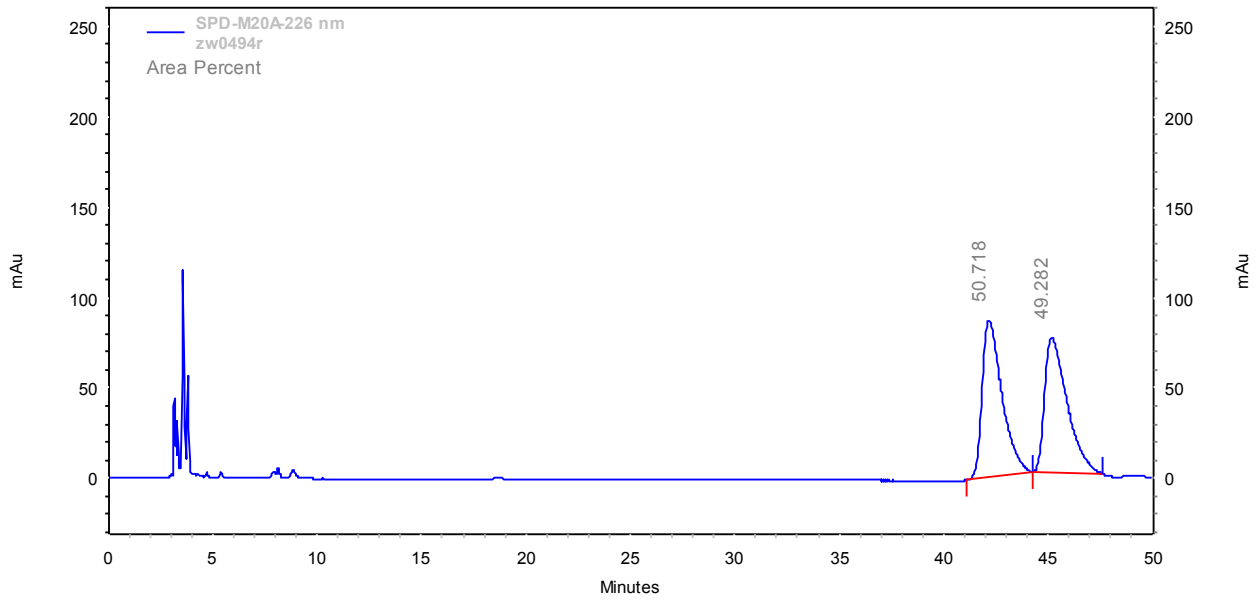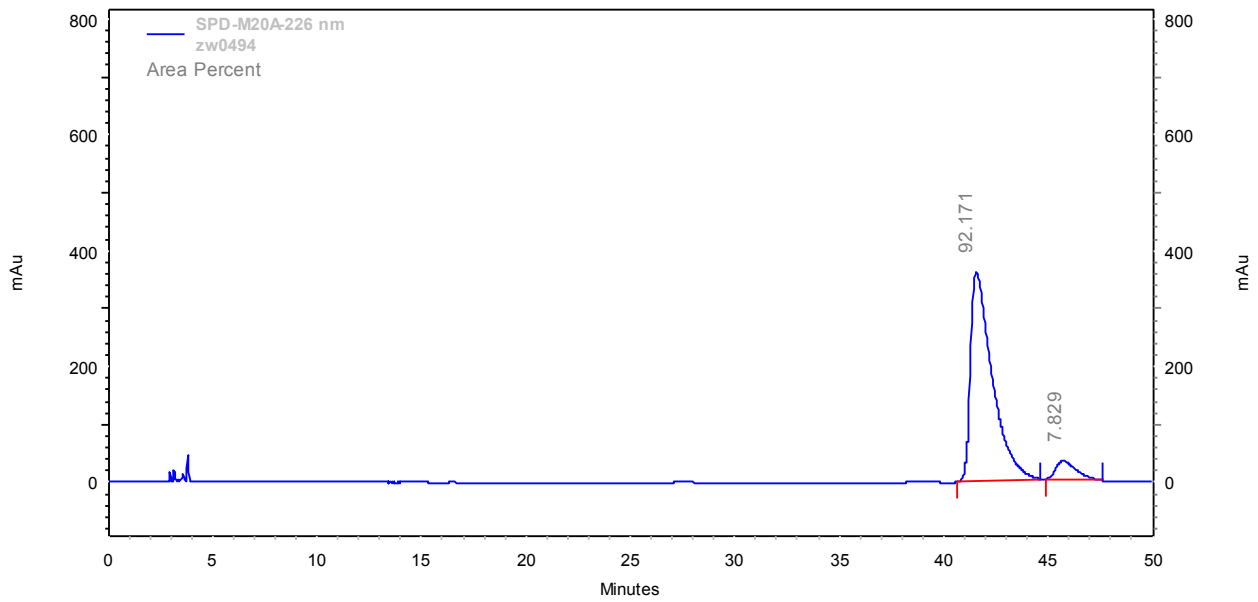

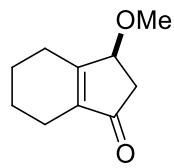

**3q**

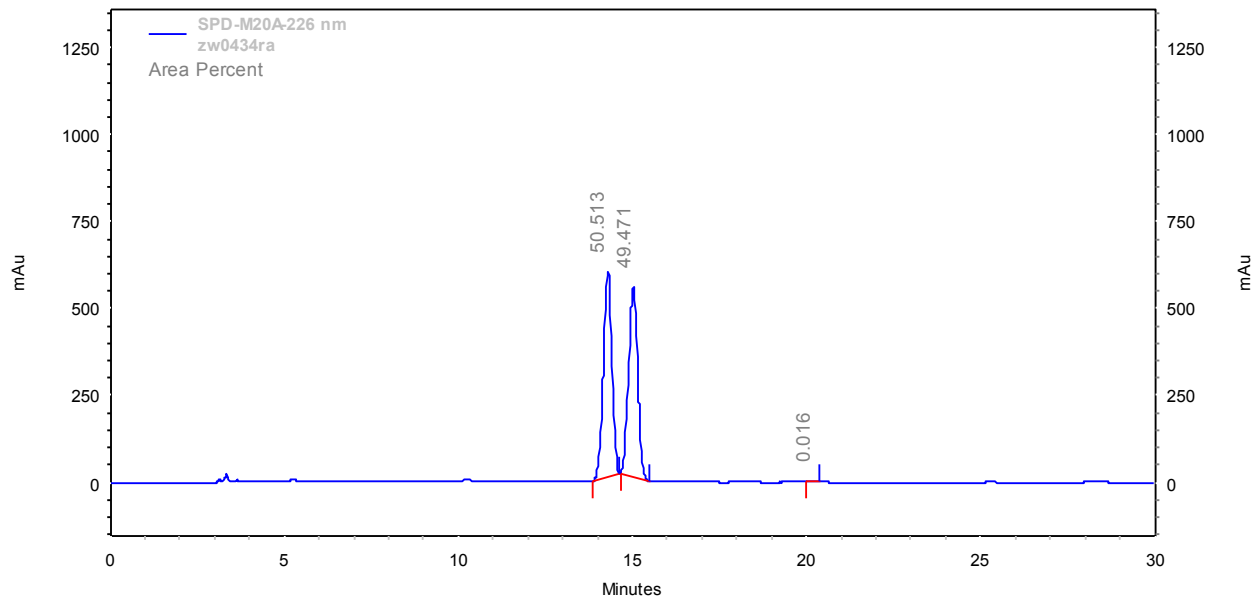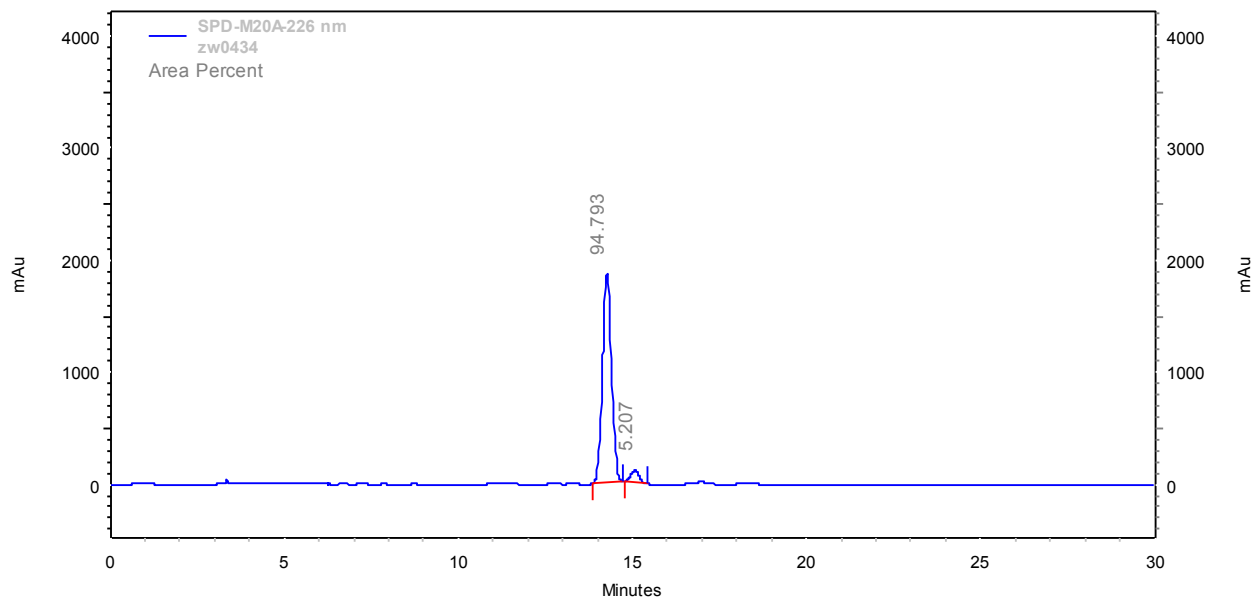

### 9. Single Crystal X-ray Analysis of 3k

A yellow prism 0.060 x 0.050 x 0.020 mm in size was mounted on a Cryoloop with Paratone oil. Data were collected in a nitrogen gas stream at 100(2) K using phi and omega scans. Crystal-to-detector distance was 60 mm and exposure time was 5 seconds per frame using a scan width of 1.0°. Data collection was 99.7% complete to 67.000° in  $\theta$ . A total of 15454 reflections were collected covering the indices,  $-10 \leq h \leq 10$ ,  $-12 \leq k \leq 10$ ,  $-13 \leq l \leq 13$ . 1885 reflections were found to be symmetry independent, with an  $R_{\text{int}}$  of 0.0270. Indexing and unit cell refinement indicated a primitive, orthorhombic lattice. The space group was found to be P 21 21 (No. 19). The data were integrated using the Bruker SAINT software program and scaled using the SADABS software program. Solution by iterative methods (SHELXT) produced a complete heavy-atom phasing model consistent with the proposed structure. All non-hydrogen atoms were refined anisotropically by full-matrix least-squares (SHELXL-2013). All hydrogen atoms were placed using a riding model. Their positions were constrained relative to their parent atom using the appropriate HFIX command in SHELXL-2013. Absolute stereochemistry was unambiguously determined to be *S* at C1.

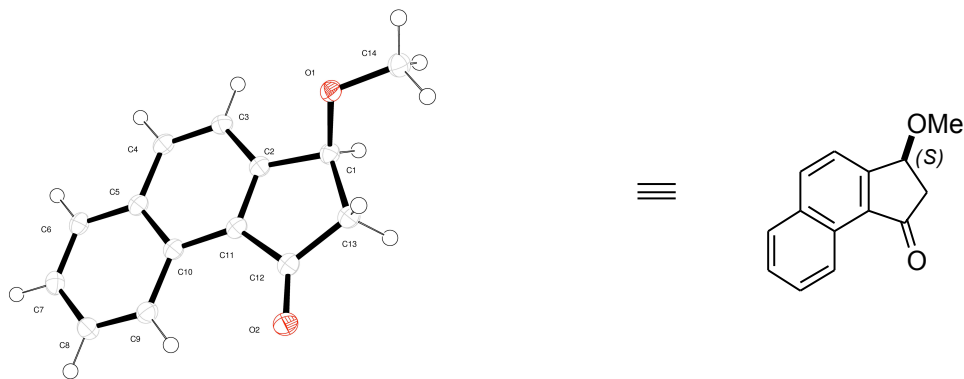

Table 1. Crystal data and structure refinement for toste79.

|                                   |                                                |                       |
|-----------------------------------|------------------------------------------------|-----------------------|
| X-ray ID                          | toste79                                        |                       |
| Sample/notebook ID                | ZW03183                                        |                       |
| Empirical formula                 | C <sub>14</sub> H <sub>12</sub> O <sub>2</sub> |                       |
| Formula weight                    | 212.24                                         |                       |
| Temperature                       | 100(2) K                                       |                       |
| Wavelength                        | 1.54178 Å                                      |                       |
| Crystal system                    | Orthorhombic                                   |                       |
| Space group                       | P 21 21 21                                     |                       |
| Unit cell dimensions              | a = 8.3759(11) Å                               | $\alpha = 90^\circ$ . |
|                                   | b = 10.6746(14) Å                              | $\beta = 90^\circ$ .  |
|                                   | c = 11.5652(15) Å                              | $\gamma = 90^\circ$ . |
| Volume                            | 1034.0(2) Å <sup>3</sup>                       |                       |
| Z                                 | 4                                              |                       |
| Density (calculated)              | 1.363 Mg/m <sup>3</sup>                        |                       |
| Absorption coefficient            | 0.725 mm <sup>-1</sup>                         |                       |
| F(000)                            | 448                                            |                       |
| Crystal size                      | 0.060 x 0.050 x 0.020 mm <sup>3</sup>          |                       |
| Crystal color/habit               | yellow prism                                   |                       |
| Theta range for data collection   | 5.640 to 68.311°.                              |                       |
| Index ranges                      | -10 ≤ h ≤ 10, -12 ≤ k ≤ 10, -13 ≤ l ≤ 13       |                       |
| Reflections collected             | 15454                                          |                       |
| Independent reflections           | 1885 [R(int) = 0.0270]                         |                       |
| Completeness to theta = 67.000°   | 99.7 %                                         |                       |
| Absorption correction             | Semi-empirical from equivalents                |                       |
| Max. and min. transmission        | 0.929 and 0.881                                |                       |
| Refinement method                 | Full-matrix least-squares on F <sup>2</sup>    |                       |
| Data / restraints / parameters    | 1885 / 0 / 146                                 |                       |
| Goodness-of-fit on F <sup>2</sup> | 1.072                                          |                       |
| Final R indices [I > 2σ(I)]       | R1 = 0.0245, wR2 = 0.0656                      |                       |
| R indices (all data)              | R1 = 0.0247, wR2 = 0.0658                      |                       |
| Absolute structure parameter      | -0.04(4)                                       |                       |
| Extinction coefficient            | n/a                                            |                       |
| Largest diff. peak and hole       | 0.111 and -0.179 e.Å <sup>-3</sup>             |                       |

Table 2. Atomic coordinates ( $\times 10^4$ ) and equivalent isotropic displacement parameters ( $\text{\AA}^2 \times 10^3$ ) for toste79.  $U(\text{eq})$  is defined as one third of the trace of the orthogonalized  $U^{ij}$  tensor.

|       | x        | y        | z       | U(eq) |
|-------|----------|----------|---------|-------|
| C(1)  | 9046(2)  | 8720(1)  | 3829(1) | 18(1) |
| C(2)  | 10240(2) | 9571(2)  | 4416(1) | 18(1) |
| C(3)  | 11892(2) | 9636(2)  | 4177(1) | 19(1) |
| C(4)  | 12797(2) | 10480(2) | 4775(1) | 20(1) |
| C(5)  | 12122(2) | 11288(1) | 5628(1) | 18(1) |
| C(6)  | 13070(2) | 12162(2) | 6238(1) | 20(1) |
| C(7)  | 12404(2) | 12951(2) | 7040(1) | 22(1) |
| C(8)  | 10756(2) | 12883(2) | 7278(1) | 23(1) |
| C(9)  | 9801(2)  | 12035(2) | 6714(1) | 21(1) |
| C(10) | 10455(2) | 11220(1) | 5876(1) | 18(1) |
| C(11) | 9544(2)  | 10325(1) | 5238(1) | 18(1) |
| C(12) | 7814(2)  | 10044(2) | 5304(1) | 19(1) |
| C(13) | 7469(2)  | 8988(2)  | 4461(1) | 22(1) |
| C(14) | 8767(2)  | 6625(2)  | 3210(1) | 21(1) |
| O(1)  | 9602(1)  | 7467(1)  | 3944(1) | 20(1) |
| O(2)  | 6824(1)  | 10553(1) | 5919(1) | 25(1) |

Table 3. Bond lengths [ $\text{\AA}$ ] and angles [ $^\circ$ ] for *toste79*.

|                   |            |              |            |
|-------------------|------------|--------------|------------|
| C(1)-O(1)         | 1.4222(18) | C(7)-H(7)    | 0.9500     |
| C(1)-C(2)         | 1.512(2)   | C(8)-C(9)    | 1.373(2)   |
| C(1)-C(13)        | 1.537(2)   | C(8)-H(8)    | 0.9500     |
| C(1)-H(1)         | 1.0000     | C(9)-C(10)   | 1.413(2)   |
| C(2)-C(11)        | 1.376(2)   | C(9)-H(9)    | 0.9500     |
| C(2)-C(3)         | 1.413(2)   | C(10)-C(11)  | 1.428(2)   |
| C(3)-C(4)         | 1.365(2)   | C(11)-C(12)  | 1.482(2)   |
| C(3)-H(3)         | 0.9500     | C(12)-O(2)   | 1.2206(19) |
| C(4)-C(5)         | 1.427(2)   | C(12)-C(13)  | 1.518(2)   |
| C(4)-H(4)         | 0.9500     | C(13)-H(13A) | 0.9900     |
| C(5)-C(6)         | 1.414(2)   | C(13)-H(13B) | 0.9900     |
| C(5)-C(10)        | 1.427(2)   | C(14)-O(1)   | 1.4206(18) |
| C(6)-C(7)         | 1.371(2)   | C(14)-H(14A) | 0.9800     |
| C(6)-H(6)         | 0.9500     | C(14)-H(14B) | 0.9800     |
| C(7)-C(8)         | 1.410(2)   | C(14)-H(14C) | 0.9800     |
|                   |            |              |            |
| O(1)-C(1)-C(2)    | 107.86(12) |              |            |
| O(1)-C(1)-C(13)   | 114.34(13) |              |            |
| C(2)-C(1)-C(13)   | 104.10(12) |              |            |
| O(1)-C(1)-H(1)    | 110.1      |              |            |
| C(2)-C(1)-H(1)    | 110.1      |              |            |
| C(13)-C(1)-H(1)   | 110.1      |              |            |
| C(11)-C(2)-C(3)   | 121.42(15) |              |            |
| C(11)-C(2)-C(1)   | 112.43(13) |              |            |
| C(3)-C(2)-C(1)    | 126.15(14) |              |            |
| C(4)-C(3)-C(2)    | 118.49(14) |              |            |
| C(4)-C(3)-H(3)    | 120.8      |              |            |
| C(2)-C(3)-H(3)    | 120.8      |              |            |
| C(3)-C(4)-C(5)    | 121.95(13) |              |            |
| C(3)-C(4)-H(4)    | 119.0      |              |            |
| C(5)-C(4)-H(4)    | 119.0      |              |            |
| C(6)-C(5)-C(4)    | 121.42(13) |              |            |
| C(6)-C(5)-C(10)   | 118.86(14) |              |            |
| C(4)-C(5)-C(10)   | 119.72(14) |              |            |
| C(7)-C(6)-C(5)    | 120.93(14) |              |            |
| C(7)-C(6)-H(6)    | 119.5      |              |            |
| C(5)-C(6)-H(6)    | 119.5      |              |            |
| C(6)-C(7)-C(8)    | 119.97(15) |              |            |
| C(6)-C(7)-H(7)    | 120.0      |              |            |
| C(8)-C(7)-H(7)    | 120.0      |              |            |
| C(9)-C(8)-C(7)    | 120.73(15) |              |            |
| C(9)-C(8)-H(8)    | 119.6      |              |            |
| C(7)-C(8)-H(8)    | 119.6      |              |            |
| C(8)-C(9)-C(10)   | 120.44(14) |              |            |
| C(8)-C(9)-H(9)    | 119.8      |              |            |
| C(10)-C(9)-H(9)   | 119.8      |              |            |
| C(9)-C(10)-C(5)   | 119.06(14) |              |            |
| C(9)-C(10)-C(11)  | 124.01(13) |              |            |
| C(5)-C(10)-C(11)  | 116.92(14) |              |            |
| C(2)-C(11)-C(10)  | 121.49(14) |              |            |
| C(2)-C(11)-C(12)  | 109.35(14) |              |            |
| C(10)-C(11)-C(12) | 129.15(14) |              |            |

|                     |            |
|---------------------|------------|
| O(2)-C(12)-C(11)    | 127.18(15) |
| O(2)-C(12)-C(13)    | 125.14(14) |
| C(11)-C(12)-C(13)   | 107.69(13) |
| C(12)-C(13)-C(1)    | 106.24(12) |
| C(12)-C(13)-H(13A)  | 110.5      |
| C(1)-C(13)-H(13A)   | 110.5      |
| C(12)-C(13)-H(13B)  | 110.5      |
| C(1)-C(13)-H(13B)   | 110.5      |
| H(13A)-C(13)-H(13B) | 108.7      |
| O(1)-C(14)-H(14A)   | 109.5      |
| O(1)-C(14)-H(14B)   | 109.5      |
| H(14A)-C(14)-H(14B) | 109.5      |
| O(1)-C(14)-H(14C)   | 109.5      |
| H(14A)-C(14)-H(14C) | 109.5      |
| H(14B)-C(14)-H(14C) | 109.5      |
| C(14)-O(1)-C(1)     | 112.22(11) |

---

Symmetry transformations used to generate equivalent atoms:

Table 4. Anisotropic displacement parameters ( $\text{\AA}^2 \times 10^3$ ) for *toste79*. The anisotropic displacement factor exponent takes the form:  $-2\pi^2 [ h^2 a^{*2} U^{11} + \dots + 2 h k a^* b^* U^{12} ]$

|       | $U^{11}$ | $U^{22}$ | $U^{33}$ | $U^{23}$ | $U^{13}$ | $U^{12}$ |
|-------|----------|----------|----------|----------|----------|----------|
| C(1)  | 18(1)    | 18(1)    | 18(1)    | 2(1)     | -1(1)    | 0(1)     |
| C(2)  | 19(1)    | 16(1)    | 17(1)    | 4(1)     | -1(1)    | 1(1)     |
| C(3)  | 19(1)    | 20(1)    | 19(1)    | 2(1)     | 2(1)     | 2(1)     |
| C(4)  | 15(1)    | 22(1)    | 22(1)    | 4(1)     | 2(1)     | 0(1)     |
| C(5)  | 19(1)    | 18(1)    | 18(1)    | 5(1)     | -2(1)    | 1(1)     |
| C(6)  | 19(1)    | 21(1)    | 21(1)    | 5(1)     | -2(1)    | -1(1)    |
| C(7)  | 25(1)    | 19(1)    | 21(1)    | 2(1)     | -5(1)    | -2(1)    |
| C(8)  | 26(1)    | 23(1)    | 22(1)    | -3(1)    | -1(1)    | 2(1)     |
| C(9)  | 19(1)    | 24(1)    | 21(1)    | 1(1)     | 0(1)     | 1(1)     |
| C(10) | 19(1)    | 17(1)    | 18(1)    | 4(1)     | -1(1)    | 1(1)     |
| C(11) | 18(1)    | 20(1)    | 17(1)    | 4(1)     | 0(1)     | 1(1)     |
| C(12) | 19(1)    | 21(1)    | 18(1)    | 4(1)     | 0(1)     | 0(1)     |
| C(13) | 17(1)    | 24(1)    | 25(1)    | -2(1)    | 1(1)     | -1(1)    |
| C(14) | 20(1)    | 20(1)    | 25(1)    | 1(1)     | 0(1)     | -3(1)    |
| O(1)  | 19(1)    | 18(1)    | 23(1)    | 0(1)     | -3(1)    | 1(1)     |
| O(2)  | 18(1)    | 30(1)    | 26(1)    | -4(1)    | 4(1)     | -1(1)    |

---



Table 5. Hydrogen coordinates ( $\times 10^4$ ) and isotropic displacement parameters ( $\text{\AA}^2 \times 10^{-3}$ ) for toste79.

|        | x     | y     | z    | U(eq) |
|--------|-------|-------|------|-------|
| H(1)   | 8948  | 8946  | 2993 | 22    |
| H(3)   | 12363 | 9105  | 3613 | 23    |
| H(4)   | 13908 | 10531 | 4618 | 24    |
| H(6)   | 14185 | 12204 | 6091 | 24    |
| H(7)   | 13053 | 13542 | 7434 | 26    |
| H(8)   | 10300 | 13430 | 7836 | 28    |
| H(9)   | 8694  | 11996 | 6888 | 25    |
| H(13A) | 6632  | 9242  | 3904 | 27    |
| H(13B) | 7099  | 8233  | 4880 | 27    |
| H(14A) | 7641  | 6595  | 3438 | 32    |
| H(14B) | 9234  | 5787  | 3277 | 32    |
| H(14C) | 8849  | 6913  | 2407 | 32    |
